# Supplementary material for: Reference data-set driven metabolomics
Source: Research Square preprint supplement (doi:10.21203/rs.3.rs-654519/v1), 2021-07-12
Supplement: Supplementary file 1 [file 607449fa9a5e5139d49115b5.xlsx]

## Sheet: metadata
filename	sample_name	description	simple_complex	sample_type	sample_type_aquatic_land	sample_type_group1	sample_type_group2	sample_type_group3	sample_type_group4	sample_type_group5	sample_type_group6	sample_type_groupB1	sample_type_groupB2	sample_type_groupB3	processed_method	botanical_genus	botanical_genus_species	botanical_anatomy	botanical_family	collection_timestamp	dna_extracted	elevation	env_biome	env_feature	env_material	env_package	fermentation_day	geo_loc_name	host_scientific_name	host_taxid	latitude	longitude	scientific_name	site_name	taxon_id	title	varietal	rep_nb	sample_type_common	empo_1	empo_2	empo_3	fermented	plate_num	run_order	additives	additives_specific	age	age_units
15NAVY01_V1_ALL_GB2_01_39810.mzXML	15NAVY01_V1_ALL	15NAVY01_V1_ALL	complex	food	complex	complex	complex	complex	complex	complex	complex	complex	complex	complex	not entered	not entered	not entered	not entered	not entered	not entered	FALSE	193	urban biome	anthropogenic environmental material	food product	misc environment	none	USA:CO:Boulder	not entered	not entered	40.015	-105.27	not entered	not entered	not entered	Global FoodOmics_ONR_food	not applicable	not applicable	meal	host-associated	not applicable	not applicable	not entered	Fp_meal		not entered	not applicable	not applicable	not applicable
15NAVY01_V1_breakfast_GA7_01_39806.mzXML	15NAVY01_V1_breakfast	15NAVY01_V1_breakfast	complex	food	complex	complex	complex	complex	complex	complex	complex	complex	complex	complex	not entered	not entered	not entered	not entered	not entered	not entered	FALSE	193	urban biome	anthropogenic environmental material	food product	misc environment	none	USA:CO:Boulder	not entered	not entered	40.015	-105.27	not entered	not entered	not entered	Global FoodOmics_ONR_food	not applicable	not applicable	meal	host-associated	not applicable	not applicable	not entered	Fp_meal		not entered	not applicable	not applicable	not applicable
15NAVY01_v1_brk_1_GA4_01_39548.mzXML	15NAVY01_v1_brk_1	**Peanut Butter Smooth, 8/14	complex	food	land	plant	fruit	legume	legume	peanut	complex	not applicable	not applicable	not applicable	not entered	not applicable	not applicable	not applicable	not applicable	not entered	FALSE	193	urban biome	anthropogenic environmental material	food product	misc environment	none	USA:CO:Boulder	not entered	not entered	40.015	-105.27	not entered	not entered	not entered	Global FoodOmics_ONR_food	not applicable	not applicable	peanut butter	host associated	plant	plant-corpus	no	Fp1	39548	not collected	not applicable	not applicable	not applicable
15NAVY01_v1_brk_2_GB4_01_39546.mzXML	15NAVY01_v1_brk_2	Honey Nut Cheerios	complex	food	land	plant	fruit	grain/grass	complex	complex	complex	not applicable	not applicable	not applicable	not entered	not entered	not entered	not entered	not entered	not entered	FALSE	193	urban biome	anthropogenic environmental material	food product	misc environment	none	USA:CO:Boulder	not entered	not entered	40.015	-105.27	not entered	not entered	not entered	Global FoodOmics_ONR_food	not applicable	not applicable	cereal	host-associated	plant	plant-corpus	no	Fp1	39546	not entered	not applicable	not applicable	not applicable
15NAVY01_v1_brk_3_GC4_01_39547.mzXML	15NAVY01_v1_brk_3	Bread White, Aspen	complex	food	land	plant	fruit	grain/grass	complex	complex	complex	not applicable	not applicable	not applicable	not entered	not entered	not entered	not entered	not entered	not entered	FALSE	193	urban biome	anthropogenic environmental material	food product	misc environment	none	USA:CO:Boulder	not entered	not entered	40.015	-105.27	not entered	not entered	not entered	Global FoodOmics_ONR_food	not applicable	not applicable	bread	host associated	plant	plant-corpus	yes	Fp1	39547	not entered	not applicable	not applicable	not applicable
15NAVY01_v1_lun_1_GA5_01_39630.mzXML	15NAVY01_v1_lun_1	Turkey, ROAST,FRESH,TOM,Mayonnaise Light Kraft 8/14,Mustard Yellow,Apple Juice 7/15	complex	food	land	complex	complex	complex	complex	complex	complex	not applicable	not applicable	not applicable	not entered	not entered	not entered	not entered	not entered	not entered	FALSE	193	urban biome	anthropogenic environmental material	food product	misc environment	none	USA:CO:Boulder	not entered	not entered	40.015	-105.27	not entered	not entered	not entered	Global FoodOmics_ONR_food	not applicable	not applicable	not entered	host associated	not applicable	not applicable	no	Fp1	39630	not entered	not applicable	not applicable	not applicable
15NAVY01_v1_lun_2_GB5_01_39627.mzXML	15NAVY01_v1_lun_2	Grapes Red or Green,Apple Juice 7/15	complex	food	land	plant	fruit	complex	complex	complex	complex	not applicable	not applicable	not applicable	not entered	not entered	not entered	not entered	not entered	not entered	FALSE	193	urban biome	anthropogenic environmental material	food product	misc environment	none	USA:CO:Boulder	not entered	not entered	40.015	-105.27	not entered	not entered	not entered	Global FoodOmics_ONR_food	not applicable	not applicable	grape	host associated	plant	plant-corpus	no	Fp1	39627	not entered	not applicable	not applicable	not applicable
15NAVY01_v1_lun_3_GC5_01_39628.mzXML	15NAVY01_v1_lun_3	Bread White, Aspen,Apple Juice 7/15	complex	food	land	plant	fruit	complex	complex	complex	complex	not applicable	not applicable	not applicable	not entered	not entered	not entered	not entered	not entered	not entered	FALSE	193	urban biome	anthropogenic environmental material	food product	misc environment	none	USA:CO:Boulder	not entered	not entered	40.015	-105.27	not entered	not entered	not entered	Global FoodOmics_ONR_food	not applicable	not applicable	bread	host associated	plant	plant-corpus	yes	Fp1	39628	not entered	not applicable	not applicable	not applicable
15NAVY01_v1_lun_4_GD5_01_39629.mzXML	15NAVY01_v1_lun_4	Pretzels Rold Gold-09/07,Apple Juice 7/15	complex	food	land	complex	complex	complex	complex	complex	complex	not applicable	not applicable	not applicable	not entered	not entered	not entered	not entered	not entered	not entered	FALSE	193	urban biome	anthropogenic environmental material	food product	misc environment	none	USA:CO:Boulder	not entered	not entered	40.015	-105.27	not entered	not entered	not entered	Global FoodOmics_ONR_food	not applicable	not applicable	pretzel	host-associated	plant	plant-corpus	no	Fp1	39629	not entered	not applicable	not applicable	not applicable
15NAVY01_V1_lunch_GB1_01_39808.mzXML	15NAVY01_V1_lunch	15NAVY01_V1_lunch	complex	food	complex	complex	complex	complex	complex	complex	complex	complex	complex	complex	not entered	not entered	not entered	not entered	not entered	not entered	FALSE	193	urban biome	anthropogenic environmental material	food product	misc environment	none	USA:CO:Boulder	not entered	not entered	40.015	-105.27	not entered	not entered	not entered	Global FoodOmics_ONR_food	not applicable	not applicable	meal	host-associated	not applicable	not applicable	not entered	Fp_meal		not entered	not applicable	not applicable	not applicable
15NAVY01_V1_snack_GA6_01_39807.mzXML	15NAVY01_V1_snack	15NAVY01_V1_snack	complex	food	complex	complex	complex	complex	complex	complex	complex	complex	complex	complex	not entered	not entered	not entered	not entered	not entered	not entered	FALSE	193	urban biome	anthropogenic environmental material	food product	misc environment	none	USA:CO:Boulder	not entered	not entered	40.015	-105.27	not entered	not entered	not entered	Global FoodOmics_ONR_food	not applicable	not applicable	meal	host-associated	not applicable	not applicable	not entered	Fp_meal		not entered	not applicable	not applicable	not applicable
15NAVY01_v1_snk_1_GG3_01_39516.mzXML	15NAVY01_v1_snk_1	Potato Chip BAKED Plain	complex	food	land	plant	vegetable/herb	vegetable/herb	vegetable	potato	potato	not applicable	not applicable	not applicable	not entered	not entered	not entered	not entered	not entered	not entered	FALSE	193	urban biome	anthropogenic environmental material	food product	misc environment	none	USA:CO:Boulder	not entered	not entered	40.015	-105.27	not entered	not entered	not entered	Global FoodOmics_ONR_food	not applicable	not applicable	chip	host-associated	plant	plant-corpus	no	Fp1	39516	not entered	not applicable	not applicable	not applicable
15NAVY01_v1_snk_2_GH3_01_39517.mzXML	15NAVY01_v1_snk_2	Granola Bar, Nature Valley Sweet n Salty	complex	food	land	complex	complex	complex	complex	complex	complex	not applicable	not applicable	not applicable	not entered	not entered	not entered	not entered	not entered	not entered	FALSE	193	urban biome	anthropogenic environmental material	food product	misc environment	none	USA:CO:Boulder	not entered	not entered	40.015	-105.27	not entered	not entered	not entered	Global FoodOmics_ONR_food	not applicable	not applicable	snack bar	host associated	not applicable	not applicable	no	Fp1	39517	not entered	not applicable	not applicable	not applicable
15NAVY01_v1_sup_1_GD4_01_39583.mzXML	15NAVY01_v1_sup_1	Green Beans	complex	food	land	plant	fruit	legume	legume	bean	green bean	not applicable	not applicable	not applicable	not entered	not entered	not entered	not entered	not entered	not entered	FALSE	193	urban biome	anthropogenic environmental material	food product	misc environment	none	USA:CO:Boulder	not entered	not entered	40.015	-105.27	not entered	not entered	not entered	Global FoodOmics_ONR_food	not applicable	not applicable	fresh bean	host-associated	plant	plant-corpus	no	Fp1	39583	not entered	not applicable	not applicable	not applicable
15NAVY01_v1_sup_2_GE4_01_39586.mzXML	15NAVY01_v1_sup_2	Butter, without salt 7/14	complex	food	land	animal	animal	dairy	butter	butter	butter	not applicable	not applicable	not applicable	not entered	not entered	not entered	not entered	not entered	not entered	FALSE	193	urban biome	anthropogenic environmental material	food product	misc environment	none	USA:CO:Boulder	not entered	not entered	40.015	-105.27	not entered	not entered	not entered	Global FoodOmics_ONR_food	not applicable	not applicable	butter	host-associated	animal	animal-secretion	no	Fp1	39586	not entered	not applicable	not applicable	not applicable
15NAVY01_v1_sup_3_rerun_GF4_01_39663.mzXML	15NAVY01_v1_sup_3	**Roll, WHEAT, Aspen 4/15	complex	food	land	plant	fruit	grain/grass	grain/grass	complex	complex	not applicable	not applicable	not applicable	not entered	not applicable	not applicable	not applicable	not applicable	not entered	FALSE	193	urban biome	anthropogenic environmental material	food product	misc environment	none	USA:CO:Boulder	not entered	not entered	40.015	-105.27	not entered	not entered	not entered	Global FoodOmics_ONR_food	not applicable	not applicable	bread roll	host associated	plant	plant-corpus	yes	Fp1	39663	not collected	not applicable	not applicable	not applicable
15NAVY01_v1_sup_4_GG4_01_39587.mzXML	15NAVY01_v1_sup_4	Chicken Breast	complex	food	land	animal	animal	poultry	poultry	chicken	chicken	not applicable	not applicable	not applicable	not entered	not entered	not entered	not entered	not entered	not entered	FALSE	193	urban biome	anthropogenic environmental material	food product	misc environment	none	USA:CO:Boulder	not entered	not entered	40.015	-105.27	not entered	not entered	not entered	Global FoodOmics_ONR_food	not applicable	not applicable	meat	host associated	animal	animal-corpus	no	Fp1	39587	not entered	not applicable	not applicable	not applicable
15NAVY01_v1_sup_5_GH4_01_39585.mzXML	15NAVY01_v1_sup_5	**Pudding, Vanilla Jell-o 8/14	complex	food	land	complex	complex	complex	complex	complex	complex	not applicable	not applicable	not applicable	not entered	not applicable	not applicable	not applicable	not applicable	not entered	FALSE	193	urban biome	anthropogenic environmental material	food product	misc environment	none	USA:CO:Boulder	not entered	not entered	40.015	-105.27	not entered	not entered	not entered	Global FoodOmics_ONR_food	not applicable	not applicable	pudding	host-associated	not applicable	not applicable	no	Fp1	39585	not collected	not applicable	not applicable	not applicable
15NAVY01_V1_supper_GA8_01_39809.mzXML	15NAVY01_V1_supper	15NAVY01_V1_supper	complex	food	complex	complex	complex	complex	complex	complex	complex	complex	complex	complex	not entered	not entered	not entered	not entered	not entered	not entered	FALSE	193	urban biome	anthropogenic environmental material	food product	misc environment	none	USA:CO:Boulder	not entered	not entered	40.015	-105.27	not entered	not entered	not entered	Global FoodOmics_ONR_food	not applicable	not applicable	meal	host-associated	not applicable	not applicable	not entered	Fp_meal		not entered	not applicable	not applicable	not applicable
16NAVY05_V1_ALL_GA5_01_39802.mzXML	16NAVY05_V1_ALL	16NAVY05_V1_ALL	complex	food	complex	complex	complex	complex	complex	complex	complex	complex	complex	complex	not entered	not entered	not entered	not entered	not entered	not entered	FALSE	193	urban biome	anthropogenic environmental material	food product	misc environment	none	USA:CO:Boulder	not entered	not entered	40.015	-105.27	not entered	not entered	not entered	Global FoodOmics_ONR_food	not applicable	not applicable	meal	host-associated	not applicable	not applicable	not entered	Fp_meal		not entered	not applicable	not applicable	not applicable
16NAVY05_V1_breakfast_GA2_01_39797.mzXML	16NAVY05_V1_breakfast	16NAVY05_V1_breakfast	complex	food	complex	complex	complex	complex	complex	complex	complex	complex	complex	complex	not entered	not entered	not entered	not entered	not entered	not entered	FALSE	193	urban biome	anthropogenic environmental material	food product	misc environment	none	USA:CO:Boulder	not entered	not entered	40.015	-105.27	not entered	not entered	not entered	Global FoodOmics_ONR_food	not applicable	not applicable	meal	host-associated	not applicable	not applicable	not entered	Fp_meal		not entered	not applicable	not applicable	not applicable
16NAVY05_v1_brk_1_GC2_01_39541.mzXML	16NAVY05_v1_brk_1	strawberries,milk, orange juice	complex	food	land	complex	complex	complex	complex	complex	complex	not applicable	not applicable	not applicable	not entered	not entered	not entered	not entered	not entered	not entered	FALSE	193	urban biome	anthropogenic environmental material	food product	misc environment	none	USA:CO:Boulder	not entered	not entered	40.015	-105.27	not entered	not entered	not entered	Global FoodOmics_ONR_food	not applicable	not applicable	berry	host associated	not applicable	not applicable	no	Fp1	39541	not entered	not applicable	not applicable	not applicable
16NAVY05_v1_brk_2_GD2_01_39542.mzXML	16NAVY05_v1_brk_2	milk,orange juice,rice krispies	complex	food	land	complex	complex	complex	complex	complex	complex	not applicable	not applicable	not applicable	not entered	not entered	not entered	not entered	not entered	not entered	FALSE	193	urban biome	anthropogenic environmental material	food product	misc environment	none	USA:CO:Boulder	not entered	not entered	40.015	-105.27	not entered	not entered	not entered	Global FoodOmics_ONR_food	not applicable	not applicable	cereal	host associated	not applicable	not applicable	no	Fp1	39542	not entered	not applicable	not applicable	not applicable
16NAVY05_v1_brk_3_GE2_01_39543.mzXML	16NAVY05_v1_brk_3	whole wheat bread,peanut butter,milk,orange juice	complex	food	land	complex	complex	complex	complex	complex	complex	not applicable	not applicable	not applicable	not entered	not entered	not entered	not entered	not entered	not entered	FALSE	193	urban biome	anthropogenic environmental material	food product	misc environment	none	USA:CO:Boulder	not entered	not entered	40.015	-105.27	not entered	not entered	not entered	Global FoodOmics_ONR_food	not applicable	not applicable	sandwich	host associated	not applicable	not applicable	yes	Fp1	39543	not entered	not applicable	not applicable	not applicable
16NAVY05_v1_lun_1_rerun_GD3_01_39624.mzXML	16NAVY05_v1_lun_1	**Lettuce Looseleaf	complex	food	land	plant	vegetable/herb	vegetable/herb	vegetable	lettuce	lettuce	not applicable	not applicable	not applicable	not entered	not entered	not entered	leaf	not entered	not entered	FALSE	193	urban biome	anthropogenic environmental material	food product	misc environment	none	USA:CO:Boulder	not entered	not entered	40.015	-105.27	not entered	not entered	not entered	Global FoodOmics_ONR_food	not applicable	not applicable	lettuce	host-associated	plant	plant-corpus	no	Fp1	39624	not collected	not applicable	not applicable	not applicable
16NAVY05_v1_lun_2_rerun_GE3_01_39625.mzXML	16NAVY05_v1_lun_2	Applesauce Natural	complex	food	land	plant	fruit	fleshy fruit	pome	apple	complex	not applicable	not applicable	not applicable	not entered	not entered	not entered	not entered	not entered	not entered	FALSE	193	urban biome	anthropogenic environmental material	food product	misc environment	none	USA:CO:Boulder	not entered	not entered	40.015	-105.27	not entered	not entered	not entered	Global FoodOmics_ONR_food	not applicable	not applicable	apple sauce	host associated	plant	plant-corpus	no	Fp1	39625	not entered	not applicable	not applicable	not applicable
16NAVY05_v1_lun_3_GF3_01_39621.mzXML	16NAVY05_v1_lun_3	Bread, Multi-grain, Aspen,Ham , HORMEL 9/08,**Lettuce Looseleaf,Mustard, Spicy Brown 8/14,Mustard, Spicy Brown 8/14,**Cheese American, sliced 11/22,**Cheese American, sliced 11/22,Tomato Raw,Tomato Raw	complex	food	land	complex	complex	complex	complex	complex	complex	not applicable	not applicable	not applicable	not entered	not entered	not entered	not entered	not entered	not entered	FALSE	193	urban biome	anthropogenic environmental material	food product	misc environment	none	USA:CO:Boulder	not entered	not entered	40.015	-105.27	not entered	not entered	not entered	Global FoodOmics_ONR_food	not applicable	not applicable	sandwich	host associated	plant	plant-corpus	yes	Fp1	39621	not entered	not applicable	not applicable	not applicable
16NAVY05_V1_lunch_GA4_01_39799.mzXML	16NAVY05_V1_lunch	16NAVY05_V1_lunch	complex	food	complex	complex	complex	complex	complex	complex	complex	complex	complex	complex	not entered	not entered	not entered	not entered	not entered	not entered	FALSE	193	urban biome	anthropogenic environmental material	food product	misc environment	none	USA:CO:Boulder	not entered	not entered	40.015	-105.27	not entered	not entered	not entered	Global FoodOmics_ONR_food	not applicable	not applicable	meal	host-associated	not applicable	not applicable	not entered	Fp_meal		not entered	not applicable	not applicable	not applicable
16NAVY05_V1_snack_GA1_01_39798.mzXML	16NAVY05_V1_snack	16NAVY05_V1_snack	complex	food	complex	complex	complex	complex	complex	complex	complex	complex	complex	complex	not entered	not entered	not entered	not entered	not entered	not entered	FALSE	193	urban biome	anthropogenic environmental material	food product	misc environment	none	USA:CO:Boulder	not entered	not entered	40.015	-105.27	not entered	not entered	not entered	Global FoodOmics_ONR_food	not applicable	not applicable	meal	host-associated	not applicable	not applicable	not entered	Fp_meal		not entered	not applicable	not applicable	not applicable
16NAVY05_v1_snk_1_GA2_01_39513.mzXML	16NAVY05_v1_snk_1	granola bar	complex	food	land	complex	complex	complex	complex	complex	complex	not applicable	not applicable	not applicable	not entered	not entered	not entered	not entered	not entered	not entered	FALSE	193	urban biome	anthropogenic environmental material	food product	misc environment	none	USA:CO:Boulder	not entered	not entered	40.015	-105.27	not entered	not entered	not entered	Global FoodOmics_ONR_food	not applicable	not applicable	snack bar	host associated	not applicable	not applicable	no	Fp1	39513	not entered	not applicable	not applicable	not applicable
16NAVY05_v1_snk_2_GB2_01_39514.mzXML	16NAVY05_v1_snk_2	blueberry muffin	complex	food	land	complex	complex	complex	complex	complex	complex	complex	complex	complex	not entered	not entered	not entered	not entered	not entered	not entered	FALSE	193	urban biome	anthropogenic environmental material	food product	misc environment	none	USA:CO:Boulder	not entered	not entered	40.015	-105.27	not entered	not entered	not entered	Global FoodOmics_ONR_food	not applicable	not applicable	muffin	host associated	not applicable	not applicable	no	Fp1	39514	not entered	not applicable	not applicable	not applicable
16NAVY05_v1_sup_1_GF2_01_39577.mzXML	16NAVY05_v1_sup_1	**Cashews Planters 08/14,Teriyaki Sauce, Low Sodium (10/14),Oil Canola	complex	food	land	plant	complex	complex	complex	complex	complex	not applicable	not applicable	not applicable	not entered	not applicable	not applicable	not applicable	not applicable	not entered	FALSE	193	urban biome	anthropogenic environmental material	food product	misc environment	none	USA:CO:Boulder	not entered	not entered	40.015	-105.27	not entered	not entered	not entered	Global FoodOmics_ONR_food	not applicable	not applicable	nut	host associated	plant	plant-corpus	yes	Fp1	39577	not collected	not applicable	not applicable	not applicable
16NAVY05_v1_sup_2_GG2_01_39578.mzXML	16NAVY05_v1_sup_2	Chicken Breast,Teriyaki Sauce, Low Sodium (10/14),Oil Canola	complex	food	land	complex	complex	complex	complex	complex	complex	not applicable	not applicable	not applicable	not entered	not entered	not entered	not entered	not entered	not entered	FALSE	193	urban biome	anthropogenic environmental material	food product	misc environment	none	USA:CO:Boulder	not entered	not entered	40.015	-105.27	not entered	not entered	not entered	Global FoodOmics_ONR_food	not applicable	not applicable	meat	host associated	not applicable	not applicable	no	Fp1	39578	not entered	not applicable	not applicable	not applicable
16NAVY05_v1_sup_3_rerun_GH2_01_39666.mzXML	16NAVY05_v1_sup_3	Stir-fry Vegetables, Oriental Style(broccoli),Teriyaki Sauce, Low Sodium (10/14),Oil Canola	complex	food	land	plant	complex	complex	complex	complex	complex	not applicable	not applicable	not applicable	not entered	not entered	not entered	not entered	not entered	not entered	FALSE	193	urban biome	anthropogenic environmental material	food product	misc environment	none	USA:CO:Boulder	not entered	not entered	40.015	-105.27	not entered	not entered	not entered	Global FoodOmics_ONR_food	not applicable	not applicable	vegetable	host associated	plant	plant-corpus	yes	Fp1	39666	not entered	not applicable	not applicable	not applicable
16NAVY05_v1_sup_4_GA3_01_39574.mzXML	16NAVY05_v1_sup_4	Stir-fry Vegetables, Oriental Style(carrot),Teriyaki Sauce, Low Sodium (10/14),Oil Canola	complex	food	land	plant	complex	complex	complex	complex	complex	not applicable	not applicable	not applicable	not entered	not entered	not entered	not entered	not entered	not entered	FALSE	193	urban biome	anthropogenic environmental material	food product	misc environment	none	USA:CO:Boulder	not entered	not entered	40.015	-105.27	not entered	not entered	not entered	Global FoodOmics_ONR_food	not applicable	not applicable	vegetable	host associated	plant	plant-corpus	yes	Fp1	39574	not entered	not applicable	not applicable	not applicable
16NAVY05_v1_sup_5_rerun_GB3_01_39667.mzXML	16NAVY05_v1_sup_5	Nilla Wafer Nabisco,Teriyaki Sauce, Low Sodium (10/14),Oil Canola	complex	food	land	plant	complex	complex	complex	complex	complex	not applicable	not applicable	not applicable	not entered	not entered	not entered	not entered	not entered	not entered	FALSE	193	urban biome	anthropogenic environmental material	food product	misc environment	none	USA:CO:Boulder	not entered	not entered	40.015	-105.27	not entered	not entered	not entered	Global FoodOmics_ONR_food	not applicable	not applicable	cookie	host associated	not applicable	not applicable	no	Fp1	39667	not entered	not applicable	not applicable	not applicable
16NAVY05_v1_sup_6_rerun_GC3_01_39668.mzXML	16NAVY05_v1_sup_6	Rice, brown, cooked, Monarch,Teriyaki Sauce, Low Sodium (10/14),Oil Canola	complex	food	land	plant	fruit	grain/grass	grain/grass	rice	complex	not applicable	not applicable	not applicable	not entered	not entered	not entered	not entered	not entered	not entered	FALSE	193	urban biome	anthropogenic environmental material	food product	misc environment	none	USA:CO:Boulder	not entered	not entered	40.015	-105.27	not entered	not entered	not entered	Global FoodOmics_ONR_food	not applicable	not applicable	grain	host associated	plant	plant-corpus	yes	Fp1	39668	not entered	not applicable	not applicable	not applicable
16NAVY05_V1_supper_GA3_01_39800.mzXML	16NAVY05_V1_supper	16NAVY05_V1_supper	complex	food	complex	complex	complex	complex	complex	complex	complex	complex	complex	complex	not entered	not entered	not entered	not entered	not entered	not entered	FALSE	193	urban biome	anthropogenic environmental material	food product	misc environment	none	USA:CO:Boulder	not entered	not entered	40.015	-105.27	not entered	not entered	not entered	Global FoodOmics_ONR_food	not applicable	not applicable	meal	host-associated	not applicable	not applicable	not entered	Fp_meal		not entered	not applicable	not applicable	not applicable
16NAVY10_V2_ALL_GD1_01_39833.mzXML	16NAVY10_V2_ALL	16NAVY10_V2_ALL	complex	food	complex	complex	complex	complex	complex	complex	complex	complex	complex	complex	not entered	not entered	not entered	not entered	not entered	not entered	FALSE	193	urban biome	anthropogenic environmental material	food product	misc environment	none	USA:CO:Boulder	not entered	not entered	40.015	-105.27	not entered	not entered	not entered	Global FoodOmics_ONR_food	not applicable	not applicable	meal	host-associated	not applicable	not applicable	not entered	Fp_meal		not entered	not applicable	not applicable	not applicable
16NAVY10_V2_breakfast_GC6_01_39828.mzXML	16NAVY10_V2_breakfast	16NAVY10_V2_breakfast	complex	food	complex	complex	complex	complex	complex	complex	complex	complex	complex	complex	not entered	not entered	not entered	not entered	not entered	not entered	FALSE	193	urban biome	anthropogenic environmental material	food product	misc environment	none	USA:CO:Boulder	not entered	not entered	40.015	-105.27	not entered	not entered	not entered	Global FoodOmics_ONR_food	not applicable	not applicable	meal	host-associated	not applicable	not applicable	not entered	Fp_meal		not entered	not applicable	not applicable	not applicable
16NAVY10_v2_brk_1_GE9_01_39561.mzXML	16NAVY10_v2_brk_1	Peanut Butter Smooth, 3/16	complex	food	land	plant	fruit	legume	legume	peanut	peanut	not applicable	not applicable	not applicable	not entered	not entered	not entered	not entered	not entered	not entered	FALSE	193	urban biome	anthropogenic environmental material	food product	misc environment	none	USA:CO:Boulder	not entered	not entered	40.015	-105.27	not entered	not entered	not entered	Global FoodOmics_ONR_food	not applicable	not applicable	peanut butter	host-associated	plant	plant-corpus	no	Fp1	39561	not entered	not applicable	not applicable	not applicable
16NAVY10_v2_brk_2_GF9_01_39559.mzXML	16NAVY10_v2_brk_2	Strawberries Fresh	complex	food	land	plant	fruit	fleshy fruit	pseudocarp	strawberry	strawberry	not applicable	not applicable	not applicable	not entered	not entered	not entered	not entered	not entered	not entered	FALSE	193	urban biome	anthropogenic environmental material	food product	misc environment	none	USA:CO:Boulder	not entered	not entered	40.015	-105.27	not entered	not entered	not entered	Global FoodOmics_ONR_food	not applicable	not applicable	berry	host-associated	plant	plant-corpus	no	Fp1	39559	not entered	not applicable	not applicable	not applicable
16NAVY10_v2_brk_3_GG9_01_39560.mzXML	16NAVY10_v2_brk_3	Bread Whole Wheat , Aspen,**Milk 2%,Orange Juice 7/15	complex	food	land	complex	complex	complex	complex	complex	complex	not applicable	not applicable	not applicable	not entered	not entered	not entered	not entered	not entered	not entered	FALSE	193	urban biome	anthropogenic environmental material	food product	misc environment	none	USA:CO:Boulder	not entered	not entered	40.015	-105.27	not entered	not entered	not entered	Global FoodOmics_ONR_food	not applicable	not applicable	bread	host associated	plant	plant-corpus	yes	Fp1	39560	not entered	not applicable	not applicable	not applicable
16NAVY10_v2_lun_1_GD10_01_39653.mzXML	16NAVY10_v2_lun_1	Bread, Multi-grain, Aspen,Mayonnaise Kraft 8/14,Mustard, Spicy Brown 8/14	complex	food	land	complex	complex	complex	complex	complex	complex	not applicable	not applicable	not applicable	not entered	not entered	not entered	not entered	not entered	not entered	FALSE	193	urban biome	anthropogenic environmental material	food product	misc environment	none	USA:CO:Boulder	not entered	not entered	40.015	-105.27	not entered	not entered	not entered	Global FoodOmics_ONR_food	not applicable	not applicable	sandwich	host associated	plant	plant-corpus	yes	Fp1	39653	not entered	not applicable	not applicable	not applicable
16NAVY10_v2_lun_2_GE10_01_39654.mzXML	16NAVY10_v2_lun_2	**Lettuce Looseleaf,Mayonnaise Kraft 8/14,	complex	food	land	plant	vegetable/herb	vegetable/herb	vegetable	lettuce	complex	not applicable	not applicable	not applicable	not entered	not entered	not entered	leaf	not entered	not entered	FALSE	193	urban biome	anthropogenic environmental material	food product	misc environment	none	USA:CO:Boulder	not entered	not entered	40.015	-105.27	not entered	not entered	not entered	Global FoodOmics_ONR_food	not applicable	not applicable	lettuce	host-associated	plant	plant-corpus	no	Fp1	39654	not collected	not applicable	not applicable	not applicable
16NAVY10_v2_lun_3_GF10_01_39657.mzXML	16NAVY10_v2_lun_3	Turkey, ROAST,FRESH,TOM,Mayonnaise Kraft 8/14	complex	food	land	complex	complex	complex	complex	complex	complex	not applicable	not applicable	not applicable	not entered	not entered	not entered	not entered	not entered	not entered	FALSE	193	urban biome	anthropogenic environmental material	food product	misc environment	none	USA:CO:Boulder	not entered	not entered	40.015	-105.27	not entered	not entered	not entered	Global FoodOmics_ONR_food	not applicable	not applicable	not entered	host associated	not applicable	not applicable	no	Fp1	39657	not entered	not applicable	not applicable	not applicable
16NAVY10_v2_lun_4_GG10_01_39652.mzXML	16NAVY10_v2_lun_4	Tomato Raw,Applesauce Natural	complex	food	land	plant	fruit	complex	complex	complex	complex	not applicable	not applicable	not applicable	not entered	not entered	not entered	not entered	not entered	not entered	FALSE	193	urban biome	anthropogenic environmental material	food product	misc environment	none	USA:CO:Boulder	not entered	not entered	40.015	-105.27	not entered	not entered	not entered	Global FoodOmics_ONR_food	not applicable	not applicable	tomato	host associated	plant	plant-corpus	no	Fp1	39652	not entered	not applicable	not applicable	not applicable
16NAVY10_v2_lun_5_GH10_01_39655.mzXML	16NAVY10_v2_lun_5	**Cheese American, sliced 11/22	complex	food	land	animal	animal	dairy	cheese	american cheese	american cheese	not applicable	not applicable	not applicable	not entered	not applicable	not applicable	not applicable	not applicable	not entered	FALSE	193	urban biome	anthropogenic environmental material	food product	misc environment	none	USA:CO:Boulder	not entered	not entered	40.015	-105.27	not entered	not entered	not entered	Global FoodOmics_ONR_food	not applicable	not applicable	cheese	host associated	animal	animal-secretion	yes	Fp1	39655	not collected	not applicable	not applicable	not applicable
16NAVY10_v2_lun_6_GA11_01_39656.mzXML	16NAVY10_v2_lun_6	Sunchips Cheddar	complex	food	land	complex	complex	complex	complex	complex	complex	not applicable	not applicable	not applicable	not entered	not entered	not entered	not entered	not entered	not entered	FALSE	193	urban biome	anthropogenic environmental material	food product	misc environment	none	USA:CO:Boulder	not entered	not entered	40.015	-105.27	not entered	not entered	not entered	Global FoodOmics_ONR_food	not applicable	not applicable	chip	host associated	not applicable	not applicable	yes	Fp1	39656	not entered	not applicable	not applicable	not applicable
16NAVY10_V2_lunch_GC8_01_39830.mzXML	16NAVY10_V2_lunch	16NAVY10_V2_lunch	complex	food	complex	complex	complex	complex	complex	complex	complex	complex	complex	complex	not entered	not entered	not entered	not entered	not entered	not entered	FALSE	193	urban biome	anthropogenic environmental material	food product	misc environment	none	USA:CO:Boulder	not entered	not entered	40.015	-105.27	not entered	not entered	not entered	Global FoodOmics_ONR_food	not applicable	not applicable	meal	host-associated	not applicable	not applicable	not entered	Fp_meal		not entered	not applicable	not applicable	not applicable
16NAVY10_V2_snack_GC5_01_39829.mzXML	16NAVY10_V2_snack	16NAVY10_V2_snack	complex	food	complex	complex	complex	complex	complex	complex	complex	complex	complex	complex	not entered	not entered	not entered	not entered	not entered	not entered	FALSE	193	urban biome	anthropogenic environmental material	food product	misc environment	none	USA:CO:Boulder	not entered	not entered	40.015	-105.27	not entered	not entered	not entered	Global FoodOmics_ONR_food	not applicable	not applicable	meal	host-associated	not applicable	not applicable	not entered	Fp_meal		not entered	not applicable	not applicable	not applicable
16NAVY10_v2_snk_1_rerun_GC9_01_39537.mzXML	16NAVY10_v2_snk_1	Grapes Red or Green	complex	food	land	plant	fruit	fleshy fruit	berry	grape	green grape	not applicable	not applicable	not applicable	not entered	not entered	not entered	not entered	not entered	not entered	FALSE	193	urban biome	anthropogenic environmental material	food product	misc environment	none	USA:CO:Boulder	not entered	not entered	40.015	-105.27	not entered	not entered	not entered	Global FoodOmics_ONR_food	not applicable	not applicable	grape	host-associated	plant	plant-corpus	no	Fp1	39537	not entered	not applicable	not applicable	not applicable
16NAVY10_v2_snk_2_rerun_GD9_01_39538.mzXML	16NAVY10_v2_snk_2	Granola Bar, Nature Valley Sweet n Salty	complex	food	land	complex	complex	complex	complex	complex	complex	not applicable	not applicable	not applicable	not entered	not entered	not entered	not entered	not entered	not entered	FALSE	193	urban biome	anthropogenic environmental material	food product	misc environment	none	USA:CO:Boulder	not entered	not entered	40.015	-105.27	not entered	not entered	not entered	Global FoodOmics_ONR_food	not applicable	not applicable	snack bar	host associated	not applicable	not applicable	no	Fp1	39538	not entered	not applicable	not applicable	not applicable
16NAVY10_v2_sup_1_GH9_01_39606.mzXML	16NAVY10_v2_sup_1	Cashews Planters, 3/16, Teriyaki Sauce, Low Sodium (10/14),Oil Canola	complex	food	land	plant	complex	complex	complex	complex	complex	not applicable	not applicable	not applicable	not entered	not entered	not entered	not entered	not entered	not entered	FALSE	193	urban biome	anthropogenic environmental material	food product	misc environment	none	USA:CO:Boulder	not entered	not entered	40.015	-105.27	not entered	not entered	not entered	Global FoodOmics_ONR_food	not applicable	not applicable	nut	host associated	plant	plant-corpus	no	Fp1	39606	not entered	not applicable	not applicable	not applicable
16NAVY10_v2_sup_2_GA10_01_39607.mzXML	16NAVY10_v2_sup_2	Rice, brown, cooked, Monarch,Teriyaki Sauce, Low Sodium (10/14),Oil Canola	complex	food	land	plant	fruit	grain/grass	grain/grass	rice	complex	not applicable	not applicable	not applicable	not entered	not entered	not entered	not entered	not entered	not entered	FALSE	193	urban biome	anthropogenic environmental material	food product	misc environment	none	USA:CO:Boulder	not entered	not entered	40.015	-105.27	not entered	not entered	not entered	Global FoodOmics_ONR_food	not applicable	not applicable	grain	host associated	plant	plant-corpus	yes	Fp1	39607	not entered	not applicable	not applicable	not applicable
16NAVY10_v2_sup_3_GB10_01_39609.mzXML	16NAVY10_v2_sup_3	Chicken Breast,Teriyaki Sauce, Low Sodium (10/14),Oil Canola	complex	food	land	complex	complex	complex	complex	complex	complex	not applicable	not applicable	not applicable	not entered	not entered	not entered	not entered	not entered	not entered	FALSE	193	urban biome	anthropogenic environmental material	food product	misc environment	none	USA:CO:Boulder	not entered	not entered	40.015	-105.27	not entered	not entered	not entered	Global FoodOmics_ONR_food	not applicable	not applicable	meat	host associated	not applicable	not applicable	no	Fp1	39609	not entered	not applicable	not applicable	not applicable
16NAVY10_v2_sup_4_GC10_01_39608.mzXML	16NAVY10_v2_sup_4	Stir-fry Vegetables, Oriental Style,Teriyaki Sauce, Low Sodium (10/14),Oil Canola	complex	food	land	plant	complex	complex	complex	complex	complex	not applicable	not applicable	not applicable	not entered	not entered	not entered	not entered	not entered	not entered	FALSE	193	urban biome	anthropogenic environmental material	food product	misc environment	none	USA:CO:Boulder	not entered	not entered	40.015	-105.27	not entered	not entered	not entered	Global FoodOmics_ONR_food	not applicable	not applicable	vegetable	host associated	plant	plant-corpus	yes	Fp1	39608	not entered	not applicable	not applicable	not applicable
16NAVY10_V2_supper_GC7_01_39831.mzXML	16NAVY10_V2_supper	16NAVY10_V2_supper	complex	food	complex	complex	complex	complex	complex	complex	complex	complex	complex	complex	not entered	not entered	not entered	not entered	not entered	not entered	FALSE	193	urban biome	anthropogenic environmental material	food product	misc environment	none	USA:CO:Boulder	not entered	not entered	40.015	-105.27	not entered	not entered	not entered	Global FoodOmics_ONR_food	not applicable	not applicable	meal	host-associated	not applicable	not applicable	not entered	Fp_meal		not entered	not applicable	not applicable	not applicable
18NAVY27_V1_ALL_GE3_01_39852.mzXML	18NAVY27_V1_ALL	18NAVY27_V1_ALL	complex	food	complex	complex	complex	complex	complex	complex	complex	complex	complex	complex	not entered	not entered	not entered	not entered	not entered	not entered	FALSE	193	urban biome	anthropogenic environmental material	food product	misc environment	none	USA:CO:Boulder	not entered	not entered	40.015	-105.27	not entered	not entered	not entered	Global FoodOmics_ONR_food	not applicable	not applicable	meal	host-associated	not applicable	not applicable	not entered	Fp_meal		not entered	not applicable	not applicable	not applicable
18NAVY27_V1_breakfast_GD8_01_39847.mzXML	18NAVY27_V1_breakfast	18NAVY27_V1_breakfast	complex	food	complex	complex	complex	complex	complex	complex	complex	complex	complex	complex	not entered	not entered	not entered	not entered	not entered	not entered	FALSE	193	urban biome	anthropogenic environmental material	food product	misc environment	none	USA:CO:Boulder	not entered	not entered	40.015	-105.27	not entered	not entered	not entered	Global FoodOmics_ONR_food	not applicable	not applicable	meal	host-associated	not applicable	not applicable	not entered	Fp_meal		not entered	not applicable	not applicable	not applicable
18NAVY27_v1_brk_1_BA3_01_39771.mzXML	18NAVY27_v1_brk_1	Cheerios,**Soy Milk, Silk, Original, 3/16,Orange Juice 7/15	complex	food	land	plant	fruit	complex	complex	complex	complex	not applicable	not applicable	not applicable	not entered	not entered	not entered	not entered	not entered	not entered	FALSE	193	urban biome	anthropogenic environmental material	food product	misc environment	none	USA:CO:Boulder	not entered	not entered	40.015	-105.27	not entered	not entered	not entered	Global FoodOmics_ONR_food	not applicable	not applicable	cereal	host associated	plant	plant-corpus	no	Fp2	39771	not entered	not applicable	not applicable	not applicable
18NAVY27_v1_brk_2_BB3_01_39772.mzXML	18NAVY27_v1_brk_2	Bagel Plain 4/15	complex	food	land	plant	complex	complex	complex	complex	complex	not applicable	not applicable	not applicable	not entered	not entered	not entered	not entered	not entered	not entered	FALSE	193	urban biome	anthropogenic environmental material	food product	misc environment	none	USA:CO:Boulder	not entered	not entered	40.015	-105.27	not entered	not entered	not entered	Global FoodOmics_ONR_food	not applicable	not applicable	bagel	host associated	not applicable	not applicable	yes	Fp2	39772	not entered	not applicable	not applicable	not applicable
18NAVY27_v1_lun_1_rerun_BB4_01_39706.mzXML	18NAVY27_v1_lun_1	Bread, Multi-grain, Aspen with oat	complex	food	land	plant	fruit	grain/grass	complex	complex	complex	not applicable	not applicable	not applicable	not entered	not entered	not entered	not entered	not entered	not entered	FALSE	193	urban biome	anthropogenic environmental material	food product	misc environment	none	USA:CO:Boulder	not entered	not entered	40.015	-105.27	not entered	not entered	not entered	Global FoodOmics_ONR_food	not applicable	not applicable	bread	host associated	plant	plant-corpus	yes	Fp2	39706	not entered	not applicable	not applicable	not applicable
18NAVY27_v1_lun_2_rerun_BC4_01_39707.mzXML	18NAVY27_v1_lun_2	Grape Red	complex	food	land	plant	fruit	fleshy fruit	berry	grape	grape	not applicable	not applicable	not applicable	not entered	not entered	not entered	not entered	not entered	not entered	FALSE	193	urban biome	anthropogenic environmental material	food product	misc environment	none	USA:CO:Boulder	not entered	not entered	40.015	-105.27	not entered	not entered	not entered	Global FoodOmics_ONR_food	not applicable	not applicable	grape	host associated	plant	plant-corpus	no	Fp2	39707	not entered	not applicable	not applicable	not applicable
18NAVY27_v1_lun_3_rerun_BD4_01_39690.mzXML	18NAVY27_v1_lun_3	Cheese Cheddar Sliced 11/06	complex	food	land	animal	animal	dairy	cheese	cheddar cheese	cheddar cheese	not applicable	not applicable	not applicable	not entered	not entered	not entered	not entered	not entered	not entered	FALSE	193	urban biome	anthropogenic environmental material	food product	misc environment	none	USA:CO:Boulder	not entered	not entered	40.015	-105.27	not entered	not entered	not entered	Global FoodOmics_ONR_food	not applicable	not applicable	cheese	host associated	not entered	not entered	not entered	Fp2	39690	not entered	not applicable	not applicable	not applicable
18NAVY27_v1_lun_4_BE4_01_39691.mzXML	18NAVY27_v1_lun_4	Nilla Wafer Nabisco, dry	complex	food	land	plant	complex	complex	complex	complex	complex	not applicable	not applicable	not applicable	not entered	not entered	not entered	not entered	not entered	not entered	FALSE	193	urban biome	anthropogenic environmental material	food product	misc environment	none	USA:CO:Boulder	not entered	not entered	40.015	-105.27	not entered	not entered	not entered	Global FoodOmics_ONR_food	not applicable	not applicable	cookie	host associated	not entered	not applicable	no	Fp2	39691	not entered	not applicable	not applicable	not applicable
18NAVY27_v1_lun_5_BF4_01_39692.mzXML	18NAVY27_v1_lun_5	Potato chip Lays 2007	complex	food	land	plant	vegetable/herb	vegetable/herb	vegetable	potato	potato	not applicable	not applicable	not applicable	not entered	not entered	not entered	not entered	not entered	not entered	FALSE	193	urban biome	anthropogenic environmental material	food product	misc environment	none	USA:CO:Boulder	not entered	not entered	40.015	-105.27	not entered	not entered	not entered	Global FoodOmics_ONR_food	not applicable	not applicable	chip	host-associated	plant	plant-corpus	no	Fp2	39692	not entered	not applicable	not applicable	not applicable
18NAVY27_v1_lun_6_BG4_01_39693.mzXML	18NAVY27_v1_lun_6	Turkey, ROAST,FRESH,TOM	complex	food	land	animal	animal	poultry	poultry	turkey	turkey	not applicable	not applicable	not applicable	not entered	not entered	not entered	not entered	not entered	not entered	FALSE	193	urban biome	anthropogenic environmental material	food product	misc environment	none	USA:CO:Boulder	not entered	not entered	40.015	-105.27	not entered	not entered	not entered	Global FoodOmics_ONR_food	not applicable	not applicable	meat	host-associated	not applicable	not applicable	no	Fp2	39693	not entered	not applicable	not applicable	not applicable
18NAVY27_v1_lun_7_BH4_01_39694.mzXML	18NAVY27_v1_lun_7	Mayonnaise Kraft 8/14,Mustard, Spicy Brown 8/14,Potato chip Lays 2007	complex	food	land	complex	complex	complex	complex	complex	complex	not applicable	not applicable	not applicable	not entered	not entered	not entered	not entered	not entered	not entered	FALSE	193	urban biome	anthropogenic environmental material	food product	misc environment	none	USA:CO:Boulder	not entered	not entered	40.015	-105.27	not entered	not entered	not entered	Global FoodOmics_ONR_food	not applicable	not applicable	condiments	host-associated	not applicable	not applicable	no	Fp2	39694	not entered	not applicable	not applicable	not applicable
18NAVY27_V1_lunch_GE2_01_39849.mzXML	18NAVY27_V1_lunch	18NAVY27_V1_lunch	complex	food	complex	complex	complex	complex	complex	complex	complex	complex	complex	complex	not entered	not entered	not entered	not entered	not entered	not entered	FALSE	193	urban biome	anthropogenic environmental material	food product	misc environment	none	USA:CO:Boulder	not entered	not entered	40.015	-105.27	not entered	not entered	not entered	Global FoodOmics_ONR_food	not applicable	not applicable	meal	host-associated	not applicable	not applicable	not entered	Fp_meal		not entered	not applicable	not applicable	not applicable
18NAVY27_V1_snack_GD7_01_39848.mzXML	18NAVY27_V1_snack	18NAVY27_V1_snack	complex	food	complex	complex	complex	complex	complex	complex	complex	complex	complex	complex	not entered	not entered	not entered	not entered	not entered	not entered	FALSE	193	urban biome	anthropogenic environmental material	food product	misc environment	none	USA:CO:Boulder	not entered	not entered	40.015	-105.27	not entered	not entered	not entered	Global FoodOmics_ONR_food	not applicable	not applicable	meal	host-associated	not applicable	not applicable	not entered	Fp_meal		not entered	not applicable	not applicable	not applicable
18NAVY27_v1_snk_1_BG2_01_39782.mzXML	18NAVY27_v1_snk_1	Triscuits Nabisco, 8/14,Apple Juice 7/15	complex	food	land	plant	complex	complex	complex	complex	complex	not applicable	not applicable	not applicable	not entered	not entered	not entered	not entered	not entered	not entered	FALSE	193	urban biome	anthropogenic environmental material	food product	misc environment	none	USA:CO:Boulder	not entered	not entered	40.015	-105.27	not entered	not entered	not entered	Global FoodOmics_ONR_food	not applicable	not applicable	cracker	host associated	plant	plant-corpus	no	Fp2	39782	not entered	not applicable	not applicable	not applicable
18NAVY27_v1_snk_2_BH2_01_39783.mzXML	18NAVY27_v1_snk_2	Peanut Butter Smooth, 3/16	complex	food	land	plant	fruit	legume	legume	peanut	peanut	not applicable	not applicable	not applicable	not entered	not entered	not entered	not entered	not entered	not entered	FALSE	193	urban biome	anthropogenic environmental material	food product	misc environment	none	USA:CO:Boulder	not entered	not entered	40.015	-105.27	not entered	not entered	not entered	Global FoodOmics_ONR_food	not applicable	not applicable	peanut butter	host-associated	plant	plant-corpus	no	Fp2	39783	not entered	not applicable	not applicable	not applicable
18NAVY27_v1_sup_1_BC3_01_39735.mzXML	18NAVY27_v1_sup_1	Chicken Breast,Pasta Sauce,Angela Mia, 12/10,Oil Olive	complex	food	land	complex	complex	complex	complex	complex	complex	not applicable	not applicable	not applicable	not entered	not entered	not entered	not entered	not entered	not entered	FALSE	193	urban biome	anthropogenic environmental material	food product	misc environment	none	USA:CO:Boulder	not entered	not entered	40.015	-105.27	not entered	not entered	not entered	Global FoodOmics_ONR_food	not applicable	not applicable	meat	host associated	not applicable	not applicable	no	Fp2	39735	not entered	not applicable	not applicable	not applicable
18NAVY27_v1_sup_2_BD3_01_39729.mzXML	18NAVY27_v1_sup_2	Pasta Sauce,Angela Mia, 12/10,Oil Olive	complex	food	land	plant	complex	complex	complex	complex	complex	not applicable	not applicable	not applicable	not entered	not entered	not entered	not entered	not entered	not entered	FALSE	193	urban biome	anthropogenic environmental material	food product	misc environment	none	USA:CO:Boulder	not entered	not entered	40.015	-105.27	not entered	not entered	not entered	Global FoodOmics_ONR_food	not applicable	not applicable	sauce	host associated	plant	plant-corpus	no	Fp2	39729	not entered	not applicable	not applicable	not applicable
18NAVY27_v1_sup_3_BE3_01_39730.mzXML	18NAVY27_v1_sup_3	Spaghetti COOKED,Pasta Sauce,Angela Mia, 12/10,Oil Olive	complex	food	land	plant	fruit	complex	complex	complex	complex	not applicable	not applicable	not applicable	not entered	not entered	not entered	not entered	not entered	not entered	FALSE	193	urban biome	anthropogenic environmental material	food product	misc environment	none	USA:CO:Boulder	not entered	not entered	40.015	-105.27	not entered	not entered	not entered	Global FoodOmics_ONR_food	not applicable	not applicable	pasta	host-associated	plant	plant-corpus	no	Fp2	39730	not entered	not applicable	not applicable	not applicable
18NAVY27_v1_sup_4_BF3_01_39731.mzXML	18NAVY27_v1_sup_4	Roll, Hawaiian,Butter, without salt 7/14,Oil Olive	complex	food	land	complex	complex	complex	complex	complex	complex	not applicable	not applicable	not applicable	not entered	not entered	not entered	not entered	not entered	not entered	FALSE	193	urban biome	anthropogenic environmental material	food product	misc environment	none	USA:CO:Boulder	not entered	not entered	40.015	-105.27	not entered	not entered	not entered	Global FoodOmics_ONR_food	not applicable	not applicable	roll	host associated	not applicable	not applicable	no	Fp2	39731	not entered	not applicable	not applicable	not applicable
18NAVY27_v1_sup_5_BG3_01_39732.mzXML	18NAVY27_v1_sup_5	Pound Cake Sara Lee,All Butter 8/14,Oil Olive, peach juice	complex	food	land	complex	complex	complex	complex	complex	complex	not applicable	not applicable	not applicable	not entered	not entered	not entered	not entered	not entered	not entered	FALSE	193	urban biome	anthropogenic environmental material	food product	misc environment	none	USA:CO:Boulder	not entered	not entered	40.015	-105.27	not entered	not entered	not entered	Global FoodOmics_ONR_food	not applicable	not applicable	cake	host associated	not applicable	not applicable	no	Fp2	39732	not entered	not applicable	not applicable	not applicable
18NAVY27_v1_sup_6_BH3_01_39787.mzXML	18NAVY27_v1_sup_6	Peaches in Juice MONARCH 3/08,Oil Olive	complex	food	land	plant	fruit	complex	complex	complex	complex	not applicable	not applicable	not applicable	not entered	not entered	not entered	not entered	not entered	not entered	FALSE	193	urban biome	anthropogenic environmental material	food product	misc environment	none	USA:CO:Boulder	not entered	not entered	40.015	-105.27	not entered	not entered	not entered	Global FoodOmics_ONR_food	not applicable	not applicable	stone fruit	host associated	plant	plant-corpus	no	Fp2	39787	not entered	not applicable	not applicable	not applicable
18NAVY27_v1_sup_7_BA4_01_39734.mzXML	18NAVY27_v1_sup_7	Butter, without salt 7/14,Oil Olive	complex	food	land	complex	complex	complex	complex	complex	complex	not applicable	not applicable	not applicable	not entered	not entered	not entered	not entered	not entered	not entered	FALSE	193	urban biome	anthropogenic environmental material	food product	misc environment	none	USA:CO:Boulder	not entered	not entered	40.015	-105.27	not entered	not entered	not entered	Global FoodOmics_ONR_food	not applicable	not applicable	butter	host-associated	not applicable	not applicable	no	Fp2	39734	not entered	not applicable	not applicable	not applicable
18NAVY27_V1_supper_GE1_01_39850.mzXML	18NAVY27_V1_supper	18NAVY27_V1_supper	complex	food	complex	complex	complex	complex	complex	complex	complex	complex	complex	complex	not entered	not entered	not entered	not entered	not entered	not entered	FALSE	193	urban biome	anthropogenic environmental material	food product	misc environment	none	USA:CO:Boulder	not entered	not entered	40.015	-105.27	not entered	not entered	not entered	Global FoodOmics_ONR_food	not applicable	not applicable	meal	host-associated	not applicable	not applicable	not entered	Fp_meal		not entered	not applicable	not applicable	not applicable
18NAVY27_V2_ALL_GC4_01_39826.mzXML	18NAVY27_V2_ALL	18NAVY27_V2_ALL	complex	food	complex	complex	complex	complex	complex	complex	complex	complex	complex	complex	not entered	not entered	not entered	not entered	not entered	not entered	FALSE	193	urban biome	anthropogenic environmental material	food product	misc environment	none	USA:CO:Boulder	not entered	not entered	40.015	-105.27	not entered	not entered	not entered	Global FoodOmics_ONR_food	not applicable	not applicable	meal	host-associated	not applicable	not applicable	not entered	Fp_meal		not entered	not applicable	not applicable	not applicable
18NAVY27_V2_breakfast_GC1_01_39821.mzXML	18NAVY27_V2_breakfast	18NAVY27_V2_breakfast	complex	food	complex	complex	complex	complex	complex	complex	complex	complex	complex	complex	not entered	not entered	not entered	not entered	not entered	not entered	FALSE	193	urban biome	anthropogenic environmental material	food product	misc environment	none	USA:CO:Boulder	not entered	not entered	40.015	-105.27	not entered	not entered	not entered	Global FoodOmics_ONR_food	not applicable	not applicable	meal	host-associated	not applicable	not applicable	not entered	Fp_meal		not entered	not applicable	not applicable	not applicable
18NAVY27_v2_brk_1_rerun_GB8_01_39670.mzXML	18NAVY27_v2_brk_1	Cream Cheese 11/13,Orange Juice 7/15,,**Soy Milk, Silk, Original, 3/16	complex	food	land	complex	complex	complex	complex	complex	complex	not applicable	not applicable	not applicable	not entered	not entered	not entered	not entered	not entered	not entered	FALSE	193	urban biome	anthropogenic environmental material	food product	misc environment	none	USA:CO:Boulder	not entered	not entered	40.015	-105.27	not entered	not entered	not entered	Global FoodOmics_ONR_food	not applicable	not applicable	not entered	host-associated	not applicable	not applicable	yes	Fp1	39670	not entered	not applicable	not applicable	not applicable
18NAVY27_v2_brk_2_rerun_GC8_01_39671.mzXML	18NAVY27_v2_brk_2	Bagel Plain 4/15,**Soy Milk, Silk, Original, 3/16,Orange Juice 7/15	complex	food	land	plant	complex	complex	complex	complex	complex	not applicable	not applicable	not applicable	not entered	not entered	not entered	not entered	not entered	not entered	FALSE	193	urban biome	anthropogenic environmental material	food product	misc environment	none	USA:CO:Boulder	not entered	not entered	40.015	-105.27	not entered	not entered	not entered	Global FoodOmics_ONR_food	not applicable	not applicable	bagel	host associated	not applicable	not applicable	yes	Fp1	39671	not entered	not applicable	not applicable	not applicable
18NAVY27_v2_brk_3_GD8_01_39556.mzXML	18NAVY27_v2_brk_3	Cheerios,**Soy Milk, Silk, Original, 3/16,Orange Juice 7/15	complex	food	land	plant	fruit	complex	complex	complex	complex	not applicable	not applicable	not applicable	not entered	not entered	not entered	not entered	not entered	not entered	FALSE	193	urban biome	anthropogenic environmental material	food product	misc environment	none	USA:CO:Boulder	not entered	not entered	40.015	-105.27	not entered	not entered	not entered	Global FoodOmics_ONR_food	not applicable	not applicable	cereal	host associated	plant	plant-corpus	no	Fp1	39556	not entered	not applicable	not applicable	not applicable
18NAVY27_v2_lun_1_GF8_01_39646.mzXML	18NAVY27_v2_lun_1	Bread, Multi-grain, Aspen,Mayonnaise Kraft 8/14,Mustard, Spicy Brown 8/14	complex	food	land	complex	complex	complex	complex	complex	complex	not applicable	not applicable	not applicable	not entered	not entered	not entered	not entered	not entered	not entered	FALSE	193	urban biome	anthropogenic environmental material	food product	misc environment	none	USA:CO:Boulder	not entered	not entered	40.015	-105.27	not entered	not entered	not entered	Global FoodOmics_ONR_food	not applicable	not applicable	sandwich	host associated	plant	plant-corpus	yes	Fp1	39646	not entered	not applicable	not applicable	not applicable
18NAVY27_v2_lun_2_GG8_01_39649.mzXML	18NAVY27_v2_lun_2	Turkey, ROAST,FRESH,TOM	complex	food	land	animal	animal	poultry	poultry	turkey	turkey	not applicable	not applicable	not applicable	not entered	not entered	not entered	not entered	not entered	not entered	FALSE	193	urban biome	anthropogenic environmental material	food product	misc environment	none	USA:CO:Boulder	not entered	not entered	40.015	-105.27	not entered	not entered	not entered	Global FoodOmics_ONR_food	not applicable	not applicable	meat	host-associated	not applicable	not applicable	no	Fp1	39649	not entered	not applicable	not applicable	not applicable
18NAVY27_v2_lun_3_GH8_01_39647.mzXML	18NAVY27_v2_lun_3	Cheese Cheddar Sliced 11/06	complex	food	land	animal	animal	dairy	cheese	cheddar cheese	cheddar cheese	not applicable	not applicable	not applicable	not entered	not entered	not entered	not entered	not entered	not entered	FALSE	193	urban biome	anthropogenic environmental material	food product	misc environment	none	USA:CO:Boulder	not entered	not entered	40.015	-105.27	not entered	not entered	not entered	Global FoodOmics_ONR_food	not applicable	not applicable	cheese	host associated	not entered	not entered	not entered	Fp1	39647	not entered	not applicable	not applicable	not applicable
18NAVY27_v2_lun_4_GA9_01_39645.mzXML	18NAVY27_v2_lun_4	Grapes Red or Green	complex	food	land	plant	fruit	fleshy fruit	berry	grape	green grape	not applicable	not applicable	not applicable	not entered	not entered	not entered	not entered	not entered	not entered	FALSE	193	urban biome	anthropogenic environmental material	food product	misc environment	none	USA:CO:Boulder	not entered	not entered	40.015	-105.27	not entered	not entered	not entered	Global FoodOmics_ONR_food	not applicable	not applicable	grape	host-associated	plant	plant-corpus	no	Fp1	39645	not entered	not applicable	not applicable	not applicable
18NAVY27_v2_lun_5_GB9_01_39648.mzXML	18NAVY27_v2_lun_5	Potato chip Lays 2007,Mustard, Spicy Brown 8/14,Mayonnaise Kraft 8/14	complex	food	land	complex	complex	complex	complex	complex	complex	not applicable	not applicable	not applicable	not entered	not entered	not entered	not entered	not entered	not entered	FALSE	193	urban biome	anthropogenic environmental material	food product	misc environment	none	USA:CO:Boulder	not entered	not entered	40.015	-105.27	not entered	not entered	not entered	Global FoodOmics_ONR_food	not applicable	not applicable	chip	host-associated	plant	plant-corpus	no	Fp1	39648	not entered	not applicable	not applicable	not applicable
18NAVY27_V2_lunch_GC3_01_39823.mzXML	18NAVY27_V2_lunch	18NAVY27_V2_lunch	complex	food	complex	complex	complex	complex	complex	complex	complex	complex	complex	complex	not entered	not entered	not entered	not entered	not entered	not entered	FALSE	193	urban biome	anthropogenic environmental material	food product	misc environment	none	USA:CO:Boulder	not entered	not entered	40.015	-105.27	not entered	not entered	not entered	Global FoodOmics_ONR_food	not applicable	not applicable	meal	host-associated	not applicable	not applicable	not entered	Fp_meal		not entered	not applicable	not applicable	not applicable
18NAVY27_V2_snack_GB8_01_39822.mzXML	18NAVY27_V2_snack	18NAVY27_V2_snack	complex	food	complex	complex	complex	complex	complex	complex	complex	complex	complex	complex	not entered	not entered	not entered	not entered	not entered	not entered	FALSE	193	urban biome	anthropogenic environmental material	food product	misc environment	none	USA:CO:Boulder	not entered	not entered	40.015	-105.27	not entered	not entered	not entered	Global FoodOmics_ONR_food	not applicable	not applicable	meal	host-associated	not applicable	not applicable	not entered	Fp_meal		not entered	not applicable	not applicable	not applicable
18NAVY27_v2_snk_1_GH7_01_39524.mzXML	18NAVY27_v2_snk_1	Triscuits Nabisco, 8/14,Apple Juice 7/15	complex	food	land	plant	complex	complex	complex	complex	complex	not applicable	not applicable	not applicable	not entered	not entered	not entered	not entered	not entered	not entered	FALSE	193	urban biome	anthropogenic environmental material	food product	misc environment	none	USA:CO:Boulder	not entered	not entered	40.015	-105.27	not entered	not entered	not entered	Global FoodOmics_ONR_food	not applicable	not applicable	cracker	host associated	plant	plant-corpus	no	Fp1	39524	not entered	not applicable	not applicable	not applicable
18NAVY27_v2_snk_2_GA8_01_39525.mzXML	18NAVY27_v2_snk_2	Peanut Butter Smooth, 3/16,Apple Juice 7/15	complex	food	land	plant	fruit	legume	legume	peanut	peanut	not applicable	not applicable	not applicable	not entered	not entered	not entered	not entered	not entered	not entered	FALSE	193	urban biome	anthropogenic environmental material	food product	misc environment	none	USA:CO:Boulder	not entered	not entered	40.015	-105.27	not entered	not entered	not entered	Global FoodOmics_ONR_food	not applicable	not applicable	peanut butter	host-associated	plant	plant-corpus	no	Fp1	39525	not entered	not applicable	not applicable	not applicable
18NAVY27_v2_sup_1_GE8_01_39600.mzXML	18NAVY27_v2_sup_1	Chicken Breast,Spaghetti COOKED,Pasta Sauce,Angela Mia, 12/10,Oil Olive,Parmesan Cheese 8/14,Roll, Hawaiian,Butter, without salt 7/14,Pound Cake Sara Lee,All Butter 8/14,Peaches in Juice MONARCH 3/08	complex	food	land	complex	complex	complex	complex	complex	complex	not applicable	not applicable	not applicable	not entered	not entered	not entered	not entered	not entered	not entered	FALSE	193	urban biome	anthropogenic environmental material	food product	misc environment	none	USA:CO:Boulder	not entered	not entered	40.015	-105.27	not entered	not entered	not entered	Global FoodOmics_ONR_food	not applicable	not applicable	meat	host associated	not applicable	not applicable	no	Fp1	39600	not entered	not applicable	not applicable	not applicable
18NAVY27_V2_supper_GC2_01_39824.mzXML	18NAVY27_V2_supper	18NAVY27_V2_supper	complex	food	complex	complex	complex	complex	complex	complex	complex	complex	complex	complex	not entered	not entered	not entered	not entered	not entered	not entered	FALSE	193	urban biome	anthropogenic environmental material	food product	misc environment	none	USA:CO:Boulder	not entered	not entered	40.015	-105.27	not entered	not entered	not entered	Global FoodOmics_ONR_food	not applicable	not applicable	meal	host-associated	not applicable	not applicable	not entered	Fp_meal		not entered	not applicable	not applicable	not applicable
18NAVY28_V1_ALL_rerun_GD6_01_39877.mzXML	18NAVY28_V1_ALL	18NAVY28_V1_ALL	complex	food	complex	complex	complex	complex	complex	complex	complex	complex	complex	complex	not entered	not entered	not entered	not entered	not entered	not entered	FALSE	193	urban biome	anthropogenic environmental material	food product	misc environment	none	USA:CO:Boulder	not entered	not entered	40.015	-105.27	not entered	not entered	not entered	Global FoodOmics_ONR_food	not applicable	not applicable	meal	host-associated	not applicable	not applicable	not entered	Fp_meal		not entered	not applicable	not applicable	not applicable
18NAVY28_V1_breakfast_GD3_01_39836.mzXML	18NAVY28_V1_breakfast	18NAVY28_V1_breakfast	complex	food	complex	complex	complex	complex	complex	complex	complex	complex	complex	complex	not entered	not entered	not entered	not entered	not entered	not entered	FALSE	193	urban biome	anthropogenic environmental material	food product	misc environment	none	USA:CO:Boulder	not entered	not entered	40.015	-105.27	not entered	not entered	not entered	Global FoodOmics_ONR_food	not applicable	not applicable	meal	host-associated	not applicable	not applicable	not entered	Fp_meal		not entered	not applicable	not applicable	not applicable
18NAVY28_v1_brk_1_rerun_GG11_01_39669.mzXML	18NAVY28_v1_brk_1	Cheese Cheddar Shredded	complex	food	land	animal	animal	dairy	cheese	cheddar cheese	cheddar cheese	not applicable	not applicable	not applicable	not entered	not entered	not entered	not entered	not entered	not entered	FALSE	193	urban biome	anthropogenic environmental material	food product	misc environment	none	USA:CO:Boulder	not entered	not entered	40.015	-105.27	not entered	not entered	not entered	Global FoodOmics_ONR_food	not applicable	not applicable	cheese	host associated	not entered	not entered	not entered	Fp1	39669	not entered	not applicable	not applicable	not applicable
18NAVY28_v1_brk_2_GH11_01_39565.mzXML	18NAVY28_v1_brk_2	Tortilla, Flour	complex	food	land	plant	fruit	grain/grass	grain/grass	wheat	wheat	not applicable	not applicable	not applicable	not entered	not entered	not entered	not entered	not entered	not entered	FALSE	193	urban biome	anthropogenic environmental material	food product	misc environment	none	USA:CO:Boulder	not entered	not entered	40.015	-105.27	not entered	not entered	not entered	Global FoodOmics_ONR_food	not applicable	not applicable	bread product	host associated	plant	plant-corpus	no	Fp1	39565	not entered	not applicable	not applicable	not applicable
18NAVY28_v1_brk_3_GA12_01_39566.mzXML	18NAVY28_v1_brk_3	Black Beans, reduced sodium (Drained 9/14),Picante Sauce SS packet 8/14	complex	food	land	plant	complex	complex	complex	complex	black bean	not applicable	not applicable	not applicable	not entered	not entered	not entered	not entered	not entered	not entered	FALSE	193	urban biome	anthropogenic environmental material	food product	misc environment	none	USA:CO:Boulder	not entered	not entered	40.015	-105.27	not entered	not entered	not entered	Global FoodOmics_ONR_food	not applicable	not applicable	bean	host associated	plant	plant-corpus	no	Fp1	39566	not entered	not applicable	not applicable	not applicable
18NAVY28_v1_brk_4_GB12_01_39567.mzXML	18NAVY28_v1_brk_4	Picante Sauce SS packet 8/14	complex	food	land	plant	complex	complex	complex	complex	complex	not applicable	not applicable	not applicable	not entered	not entered	not entered	not entered	not entered	not entered	FALSE	193	urban biome	anthropogenic environmental material	food product	misc environment	none	USA:CO:Boulder	not entered	not entered	40.015	-105.27	not entered	not entered	not entered	Global FoodOmics_ONR_food	not applicable	not applicable	sauce	host associated	plant	plant-corpus	no	Fp1	39567	not entered	not applicable	not applicable	not applicable
18NAVY28_v1_brk_5_GC12_01_39569.mzXML	18NAVY28_v1_brk_5	Chicken Breast, Picante Sauce SS packet 8/14	complex	food	land	complex	complex	complex	complex	complex	complex	not applicable	not applicable	not applicable	not entered	not entered	not entered	not entered	not entered	not entered	FALSE	193	urban biome	anthropogenic environmental material	food product	misc environment	none	USA:CO:Boulder	not entered	not entered	40.015	-105.27	not entered	not entered	not entered	Global FoodOmics_ONR_food	not applicable	not applicable	meat	host associated	not applicable	not applicable	no	Fp1	39569	not entered	not applicable	not applicable	not applicable
18NAVY28_v1_brk_6_GD12_01_39568.mzXML	18NAVY28_v1_brk_6	Cantaloupe,Picante Sauce SS packet 8/14	complex	food	land	plant	complex	complex	complex	complex	complex	not applicable	not applicable	not applicable	not entered	not entered	not entered	not entered	not entered	not entered	FALSE	193	urban biome	anthropogenic environmental material	food product	misc environment	none	USA:CO:Boulder	not entered	not entered	40.015	-105.27	not entered	not entered	not entered	Global FoodOmics_ONR_food	not applicable	not applicable	melon	host associated	plant	plant-corpus	no	Fp1	39568	not entered	not applicable	not applicable	not applicable
18NAVY28_v1_lun_1_BC2_01_39682.mzXML	18NAVY28_v1_lun_1	Ham , HORMEL 9/08	complex	food	land	animal	animal	meat	pig	pig	ham	not applicable	not applicable	not applicable	not entered	not entered	not entered	not entered	not entered	not entered	FALSE	193	urban biome	anthropogenic environmental material	food product	misc environment	none	USA:CO:Boulder	not entered	not entered	40.015	-105.27	not entered	not entered	not entered	Global FoodOmics_ONR_food	not applicable	not applicable	meat	host-associated	animal	animal-corpus	no	Fp2	39682	not entered	not applicable	not applicable	not applicable
18NAVY28_v1_lun_2_BD2_01_39683.mzXML	18NAVY28_v1_lun_2	Peanut Butter Smooth, 3/16	complex	food	land	plant	fruit	legume	legume	peanut	peanut	not applicable	not applicable	not applicable	not entered	not entered	not entered	not entered	not entered	not entered	FALSE	193	urban biome	anthropogenic environmental material	food product	misc environment	none	USA:CO:Boulder	not entered	not entered	40.015	-105.27	not entered	not entered	not entered	Global FoodOmics_ONR_food	not applicable	not applicable	peanut butter	host-associated	plant	plant-corpus	no	Fp2	39683	not entered	not applicable	not applicable	not applicable
18NAVY28_v1_lun_3_BE2_01_39680.mzXML	18NAVY28_v1_lun_3	Cheese Cheddar Sliced 11/06	complex	food	land	animal	animal	dairy	cheese	cheddar cheese	cheddar cheese	not applicable	not applicable	not applicable	not entered	not entered	not entered	not entered	not entered	not entered	FALSE	193	urban biome	anthropogenic environmental material	food product	misc environment	none	USA:CO:Boulder	not entered	not entered	40.015	-105.27	not entered	not entered	not entered	Global FoodOmics_ONR_food	not applicable	not applicable	cheese	host associated	not entered	not entered	not entered	Fp2	39680	not entered	not applicable	not applicable	not applicable
18NAVY28_v1_lun_4_BF2_01_39681.mzXML	18NAVY28_v1_lun_4	Bread Whole Wheat , Aspen	complex	food	land	plant	fruit	grain/grass	complex	complex	complex	not applicable	not applicable	not applicable	not entered	not entered	not entered	not entered	not entered	not entered	FALSE	193	urban biome	anthropogenic environmental material	food product	misc environment	none	USA:CO:Boulder	not entered	not entered	40.015	-105.27	not entered	not entered	not entered	Global FoodOmics_ONR_food	not applicable	not applicable	bread	host associated	plant	plant-corpus	yes	Fp2	39681	not entered	not applicable	not applicable	not applicable
18NAVY28_V1_lunch_GD5_01_39841.mzXML	18NAVY28_V1_lunch	18NAVY28_V1_lunch	complex	food	complex	complex	complex	complex	complex	complex	complex	complex	complex	complex	not entered	not entered	not entered	not entered	not entered	not entered	FALSE	193	urban biome	anthropogenic environmental material	food product	misc environment	none	USA:CO:Boulder	not entered	not entered	40.015	-105.27	not entered	not entered	not entered	Global FoodOmics_ONR_food	not applicable	not applicable	meal	host-associated	not applicable	not applicable	not entered	Fp_meal		not entered	not applicable	not applicable	not applicable
18NAVY28_V1_snack_GD2_01_39837.mzXML	18NAVY28_V1_snack	18NAVY28_V1_snack	complex	food	complex	complex	complex	complex	complex	complex	complex	complex	complex	complex	not entered	not entered	not entered	not entered	not entered	not entered	FALSE	193	urban biome	anthropogenic environmental material	food product	misc environment	none	USA:CO:Boulder	not entered	not entered	40.015	-105.27	not entered	not entered	not entered	Global FoodOmics_ONR_food	not applicable	not applicable	meal	host-associated	not applicable	not applicable	not entered	Fp_meal		not entered	not applicable	not applicable	not applicable
18NAVY28_v1_snk_1_GB11_01_39530.mzXML	18NAVY28_v1_snk_1	**15-1692 Kind Granola Bar	complex	food	land	complex	complex	complex	complex	complex	complex	not applicable	not applicable	not applicable	not entered	not applicable	not applicable	not applicable	not applicable	not entered	FALSE	193	urban biome	anthropogenic environmental material	food product	misc environment	none	USA:CO:Boulder	not entered	not entered	40.015	-105.27	not entered	not entered	not entered	Global FoodOmics_ONR_food	not applicable	not applicable	snack bar	host-associated	not applicable	not applicable	no	Fp1	39530	not collected	not applicable	not applicable	not applicable
18NAVY28_v1_snk_2_GC11_01_39531.mzXML	18NAVY28_v1_snk_2	Pretzels Rold Gold-09/07	complex	food	land	complex	complex	complex	complex	complex	complex	not applicable	not applicable	not applicable	not entered	not entered	not entered	not entered	not entered	not entered	FALSE	193	urban biome	anthropogenic environmental material	food product	misc environment	none	USA:CO:Boulder	not entered	not entered	40.015	-105.27	not entered	not entered	not entered	Global FoodOmics_ONR_food	not applicable	not applicable	pretzel	host-associated	plant	plant-corpus	no	Fp1	39531	not entered	not applicable	not applicable	not applicable
18NAVY28_v1_snk_3_GD11_01_39532.mzXML	18NAVY28_v1_snk_3	Carrot Baby	complex	food	land	plant	vegetable/herb	vegetable/herb	vegetable	carrot	carrot	not applicable	not applicable	not applicable	not entered	not entered	not entered	not entered	not entered	not entered	FALSE	193	urban biome	anthropogenic environmental material	food product	misc environment	none	USA:CO:Boulder	not entered	not entered	40.015	-105.27	not entered	not entered	not entered	Global FoodOmics_ONR_food	not applicable	not applicable	carrot	host-associated	plant	plant-corpus	no	Fp1	39532	not entered	not applicable	not applicable	not applicable
18NAVY28_v1_snk_4_GE11_01_39533.mzXML	18NAVY28_v1_snk_4	Grapes Red or Green	complex	food	land	plant	fruit	fleshy fruit	berry	grape	green grape	not applicable	not applicable	not applicable	not entered	not entered	not entered	not entered	not entered	not entered	FALSE	193	urban biome	anthropogenic environmental material	food product	misc environment	none	USA:CO:Boulder	not entered	not entered	40.015	-105.27	not entered	not entered	not entered	Global FoodOmics_ONR_food	not applicable	not applicable	grape	host-associated	plant	plant-corpus	no	Fp1	39533	not entered	not applicable	not applicable	not applicable
18NAVY28_v1_snk_5_GF11_01_39534.mzXML	18NAVY28_v1_snk_5	Graham Cracker -4/16	complex	food	land	plant	complex	complex	complex	complex	complex	not applicable	not applicable	not applicable	not entered	not entered	not entered	not entered	not entered	not entered	FALSE	193	urban biome	anthropogenic environmental material	food product	misc environment	none	USA:CO:Boulder	not entered	not entered	40.015	-105.27	not entered	not entered	not entered	Global FoodOmics_ONR_food	not applicable	not applicable	cracker	host associated	plant	plant-corpus	no	Fp1	39534	not entered	not applicable	not applicable	not applicable
18NAVY28_v1_sup_1_GE12_01_39612.mzXML	18NAVY28_v1_sup_1	Cheese Cheddar Shredded	complex	food	land	animal	animal	dairy	cheese	cheddar cheese	cheddar cheese	not applicable	not applicable	not applicable	not entered	not entered	not entered	not entered	not entered	not entered	FALSE	193	urban biome	anthropogenic environmental material	food product	misc environment	none	USA:CO:Boulder	not entered	not entered	40.015	-105.27	not entered	not entered	not entered	Global FoodOmics_ONR_food	not applicable	not applicable	cheese	host associated	not entered	not entered	not entered	Fp1	39612	not entered	not applicable	not applicable	not applicable
18NAVY28_v1_sup_2_GF12_01_39613.mzXML	18NAVY28_v1_sup_2	Potato Baked Flesh	complex	food	land	plant	vegetable/herb	vegetable/herb	vegetable	potato	potato	not applicable	not applicable	not applicable	not entered	not entered	not entered	not entered	not entered	not entered	FALSE	193	urban biome	anthropogenic environmental material	food product	misc environment	none	USA:CO:Boulder	not entered	not entered	40.015	-105.27	not entered	not entered	not entered	Global FoodOmics_ONR_food	not applicable	not applicable	potato	host-associated	plant	plant-corpus	no	Fp1	39613	not entered	not applicable	not applicable	not applicable
18NAVY28_v1_sup_3_GG12_01_39614.mzXML	18NAVY28_v1_sup_3	Broccoli	complex	food	land	plant	vegetable/herb	vegetable/herb	flower	broccoli	broccoli	not applicable	not applicable	not applicable	not entered	not entered	not entered	not entered	not entered	not entered	FALSE	193	urban biome	anthropogenic environmental material	food product	misc environment	none	USA:CO:Boulder	not entered	not entered	40.015	-105.27	not entered	not entered	not entered	Global FoodOmics_ONR_food	not applicable	not applicable	broccoli	host associated	plant	plant-corpus	no	Fp1	39614	not entered	not applicable	not applicable	not applicable
18NAVY28_v1_sup_4_rerun_GH12_01_39672.mzXML	18NAVY28_v1_sup_4	Chicken Breast	complex	food	land	animal	animal	poultry	poultry	chicken	chicken	not applicable	not applicable	not applicable	not entered	not entered	not entered	not entered	not entered	not entered	FALSE	193	urban biome	anthropogenic environmental material	food product	misc environment	none	USA:CO:Boulder	not entered	not entered	40.015	-105.27	not entered	not entered	not entered	Global FoodOmics_ONR_food	not applicable	not applicable	meat	host associated	animal	animal-corpus	no	Fp1	39672	not entered	not applicable	not applicable	not applicable
18NAVY28_v1_sup_5_BA2_01_39725.mzXML	18NAVY28_v1_sup_5	Pound Cake Sara Lee,All Butter 8/14	complex	food	land	complex	complex	complex	complex	complex	complex	not applicable	not applicable	not applicable	not entered	not entered	not entered	not entered	not entered	not entered	FALSE	193	urban biome	anthropogenic environmental material	food product	misc environment	none	USA:CO:Boulder	not entered	not entered	40.015	-105.27	not entered	not entered	not entered	Global FoodOmics_ONR_food	not applicable	not applicable	cake	host associated	not applicable	not applicable	no	Fp2	39725	not entered	not applicable	not applicable	not applicable
18NAVY28_v1_sup_6_BB2_01_39726.mzXML	18NAVY28_v1_sup_6	Butter, without salt 7/14	complex	food	land	animal	animal	dairy	butter	butter	butter	not applicable	not applicable	not applicable	not entered	not entered	not entered	not entered	not entered	not entered	FALSE	193	urban biome	anthropogenic environmental material	food product	misc environment	none	USA:CO:Boulder	not entered	not entered	40.015	-105.27	not entered	not entered	not entered	Global FoodOmics_ONR_food	not applicable	not applicable	butter	host-associated	animal	animal-secretion	no	Fp2	39726	not entered	not applicable	not applicable	not applicable
18NAVY28_V1_supper_GD4_01_39842.mzXML	18NAVY28_V1_supper	18NAVY28_V1_supper	complex	food	complex	complex	complex	complex	complex	complex	complex	complex	complex	complex	not entered	not entered	not entered	not entered	not entered	not entered	FALSE	193	urban biome	anthropogenic environmental material	food product	misc environment	none	USA:CO:Boulder	not entered	not entered	40.015	-105.27	not entered	not entered	not entered	Global FoodOmics_ONR_food	not applicable	not applicable	meal	host-associated	not applicable	not applicable	not entered	Fp_meal		not entered	not applicable	not applicable	not applicable
18NAVY28_V2_ALL_GE8_01_39859.mzXML	18NAVY28_V2_ALL	18NAVY28_V2_ALL	complex	food	complex	complex	complex	complex	complex	complex	complex	complex	complex	complex	not entered	not entered	not entered	not entered	not entered	not entered	FALSE	193	urban biome	anthropogenic environmental material	food product	misc environment	none	USA:CO:Boulder	not entered	not entered	40.015	-105.27	not entered	not entered	not entered	Global FoodOmics_ONR_food	not applicable	not applicable	meal	host-associated	not applicable	not applicable	not entered	Fp_meal		not entered	not applicable	not applicable	not applicable
18NAVY28_V2_breakfast_GE5_01_39854.mzXML	18NAVY28_V2_breakfast	18NAVY28_V2_breakfast	complex	food	complex	complex	complex	complex	complex	complex	complex	complex	complex	complex	not entered	not entered	not entered	not entered	not entered	not entered	FALSE	193	urban biome	anthropogenic environmental material	food product	misc environment	none	USA:CO:Boulder	not entered	not entered	40.015	-105.27	not entered	not entered	not entered	Global FoodOmics_ONR_food	not applicable	not applicable	meal	host-associated	not applicable	not applicable	not entered	Fp_meal		not entered	not applicable	not applicable	not applicable
18NAVY28_v2_brk_1_BD5_01_39775.mzXML	18NAVY28_v2_brk_1	Black Beans, reduced sodium (Drained 9/14),Cantaloupe,Chicken Breast,Picante Sauce SS packet 8/14	complex	food	land	plant	complex	complex	complex	complex	black bean	not applicable	not applicable	not applicable	not entered	not entered	not entered	not entered	not entered	not entered	FALSE	193	urban biome	anthropogenic environmental material	food product	misc environment	none	USA:CO:Boulder	not entered	not entered	40.015	-105.27	not entered	not entered	not entered	Global FoodOmics_ONR_food	not applicable	not applicable	bean	host associated	plant	plant-corpus	no	Fp2	39775	not entered	not applicable	not applicable	not applicable
18NAVY28_v2_brk_2_BE5_01_39773.mzXML	18NAVY28_v2_brk_2	Tortilla, Flour,Picante Sauce SS packet 8/14	complex	food	land	plant	complex	complex	complex	complex	complex	not applicable	not applicable	not applicable	not entered	not entered	not entered	not entered	not entered	not entered	FALSE	193	urban biome	anthropogenic environmental material	food product	misc environment	none	USA:CO:Boulder	not entered	not entered	40.015	-105.27	not entered	not entered	not entered	Global FoodOmics_ONR_food	not applicable	not applicable	bread product	host associated	plant	plant-corpus	no	Fp2	39773	not entered	not applicable	not applicable	not applicable
18NAVY28_v2_brk_3_BF5_01_39774.mzXML	18NAVY28_v2_brk_3	Cheese Cheddar Shredded,Picante Sauce SS packet 8/14	complex	food	land	complex	complex	complex	complex	complex	complex	not applicable	not applicable	not applicable	not entered	not entered	not entered	not entered	not entered	not entered	FALSE	193	urban biome	anthropogenic environmental material	food product	misc environment	none	USA:CO:Boulder	not entered	not entered	40.015	-105.27	not entered	not entered	not entered	Global FoodOmics_ONR_food	not applicable	not applicable	cheese	host associated	not entered	not entered	not entered	Fp2	39774	not entered	not applicable	not applicable	not applicable
18NAVY28_v2_lun_1_BF6_01_39697.mzXML	18NAVY28_v2_lun_1	Pretzels Rold Gold-09/07	complex	food	land	complex	complex	complex	complex	complex	complex	not applicable	not applicable	not applicable	not entered	not entered	not entered	not entered	not entered	not entered	FALSE	193	urban biome	anthropogenic environmental material	food product	misc environment	none	USA:CO:Boulder	not entered	not entered	40.015	-105.27	not entered	not entered	not entered	Global FoodOmics_ONR_food	not applicable	not applicable	pretzel	host-associated	plant	plant-corpus	no	Fp2	39697	not entered	not applicable	not applicable	not applicable
18NAVY28_v2_lun_2_BG6_01_39701.mzXML	18NAVY28_v2_lun_2	Ham , HORMEL 9/08	complex	food	land	animal	animal	meat	pig	pig	ham	not applicable	not applicable	not applicable	not entered	not entered	not entered	not entered	not entered	not entered	FALSE	193	urban biome	anthropogenic environmental material	food product	misc environment	none	USA:CO:Boulder	not entered	not entered	40.015	-105.27	not entered	not entered	not entered	Global FoodOmics_ONR_food	not applicable	not applicable	meat	host-associated	animal	animal-corpus	no	Fp2	39701	not entered	not applicable	not applicable	not applicable
18NAVY28_v2_lun_3_BH6_01_39703.mzXML	18NAVY28_v2_lun_3	Peanut Butter Smooth, 3/16	complex	food	land	plant	fruit	legume	legume	peanut	peanut	not applicable	not applicable	not applicable	not entered	not entered	not entered	not entered	not entered	not entered	FALSE	193	urban biome	anthropogenic environmental material	food product	misc environment	none	USA:CO:Boulder	not entered	not entered	40.015	-105.27	not entered	not entered	not entered	Global FoodOmics_ONR_food	not applicable	not applicable	peanut butter	host-associated	plant	plant-corpus	no	Fp2	39703	not entered	not applicable	not applicable	not applicable
18NAVY28_v2_lun_4_BA7_01_39698.mzXML	18NAVY28_v2_lun_4	Apple Raw With Skin	complex	food	land	plant	fruit	fleshy fruit	pome	apple	apple	not applicable	not applicable	not applicable	not entered	not entered	not entered	not entered	not entered	not entered	FALSE	193	urban biome	anthropogenic environmental material	food product	misc environment	none	USA:CO:Boulder	not entered	not entered	40.015	-105.27	not entered	not entered	not entered	Global FoodOmics_ONR_food	not applicable	not applicable	apple	host associated	plant	plant-corpus	no	Fp2	39698	not entered	not applicable	not applicable	not applicable
18NAVY28_v2_lun_5_BB7_01_39702.mzXML	18NAVY28_v2_lun_5	Potato chip Lays 2007	complex	food	land	plant	vegetable/herb	vegetable/herb	vegetable	potato	potato	not applicable	not applicable	not applicable	not entered	not entered	not entered	not entered	not entered	not entered	FALSE	193	urban biome	anthropogenic environmental material	food product	misc environment	none	USA:CO:Boulder	not entered	not entered	40.015	-105.27	not entered	not entered	not entered	Global FoodOmics_ONR_food	not applicable	not applicable	chip	host-associated	plant	plant-corpus	no	Fp2	39702	not entered	not applicable	not applicable	not applicable
18NAVY28_v2_lun_6_BC7_01_39699.mzXML	18NAVY28_v2_lun_6	Cheese Cheddar Sliced 11/06	complex	food	land	animal	animal	dairy	cheese	cheddar cheese	cheddar cheese	not applicable	not applicable	not applicable	not entered	not entered	not entered	not entered	not entered	not entered	FALSE	193	urban biome	anthropogenic environmental material	food product	misc environment	none	USA:CO:Boulder	not entered	not entered	40.015	-105.27	not entered	not entered	not entered	Global FoodOmics_ONR_food	not applicable	not applicable	cheese	host associated	not entered	not entered	not entered	Fp2	39699	not entered	not applicable	not applicable	not applicable
18NAVY28_v2_lun_7_BD7_01_39700.mzXML	18NAVY28_v2_lun_7	Bread Whole Wheat , Aspen	complex	food	land	plant	fruit	grain/grass	complex	complex	complex	not applicable	not applicable	not applicable	not entered	not entered	not entered	not entered	not entered	not entered	FALSE	193	urban biome	anthropogenic environmental material	food product	misc environment	none	USA:CO:Boulder	not entered	not entered	40.015	-105.27	not entered	not entered	not entered	Global FoodOmics_ONR_food	not applicable	not applicable	bread	host associated	plant	plant-corpus	yes	Fp2	39700	not entered	not applicable	not applicable	not applicable
18NAVY28_V2_lunch_GE7_01_39856.mzXML	18NAVY28_V2_lunch	18NAVY28_V2_lunch	complex	food	complex	complex	complex	complex	complex	complex	complex	complex	complex	complex	not entered	not entered	not entered	not entered	not entered	not entered	FALSE	193	urban biome	anthropogenic environmental material	food product	misc environment	none	USA:CO:Boulder	not entered	not entered	40.015	-105.27	not entered	not entered	not entered	Global FoodOmics_ONR_food	not applicable	not applicable	meal	host-associated	not applicable	not applicable	not entered	Fp_meal		not entered	not applicable	not applicable	not applicable
18NAVY28_V2_snack_GE4_01_39855.mzXML	18NAVY28_V2_snack	18NAVY28_V2_snack	complex	food	complex	complex	complex	complex	complex	complex	complex	complex	complex	complex	not entered	not entered	not entered	not entered	not entered	not entered	FALSE	193	urban biome	anthropogenic environmental material	food product	misc environment	none	USA:CO:Boulder	not entered	not entered	40.015	-105.27	not entered	not entered	not entered	Global FoodOmics_ONR_food	not applicable	not applicable	meal	host-associated	not applicable	not applicable	not entered	Fp_meal		not entered	not applicable	not applicable	not applicable
18NAVY28_v2_snk_1_BA5_01_39784.mzXML	18NAVY28_v2_snk_1	**15-1692 Kind Granola Bar	complex	food	land	complex	complex	complex	complex	complex	complex	not applicable	not applicable	not applicable	not entered	not applicable	not applicable	not applicable	not applicable	not entered	FALSE	193	urban biome	anthropogenic environmental material	food product	misc environment	none	USA:CO:Boulder	not entered	not entered	40.015	-105.27	not entered	not entered	not entered	Global FoodOmics_ONR_food	not applicable	not applicable	snack bar	host-associated	not applicable	not applicable	no	Fp2	39784	not collected	not applicable	not applicable	not applicable
18NAVY28_v2_snk_2_BB5_01_39761.mzXML	18NAVY28_v2_snk_2	Carrot Baby	complex	food	land	plant	vegetable/herb	vegetable/herb	vegetable	carrot	carrot	not applicable	not applicable	not applicable	not entered	not entered	not entered	not entered	not entered	not entered	FALSE	193	urban biome	anthropogenic environmental material	food product	misc environment	none	USA:CO:Boulder	not entered	not entered	40.015	-105.27	not entered	not entered	not entered	Global FoodOmics_ONR_food	not applicable	not applicable	carrot	host-associated	plant	plant-corpus	no	Fp2	39761	not entered	not applicable	not applicable	not applicable
18NAVY28_v2_snk_3_BC5_01_39762.mzXML	18NAVY28_v2_snk_3	Graham Cracker -4/16	complex	food	land	plant	complex	complex	complex	complex	complex	not applicable	not applicable	not applicable	not entered	not entered	not entered	not entered	not entered	not entered	FALSE	193	urban biome	anthropogenic environmental material	food product	misc environment	none	USA:CO:Boulder	not entered	not entered	40.015	-105.27	not entered	not entered	not entered	Global FoodOmics_ONR_food	not applicable	not applicable	cracker	host associated	plant	plant-corpus	no	Fp2	39762	not entered	not applicable	not applicable	not applicable
18NAVY28_v2_sup_1_BG5_01_39739.mzXML	18NAVY28_v2_sup_1	Broccoli	complex	food	land	plant	vegetable/herb	vegetable/herb	flower	broccoli	broccoli	not applicable	not applicable	not applicable	not entered	not entered	not entered	not entered	not entered	not entered	FALSE	193	urban biome	anthropogenic environmental material	food product	misc environment	none	USA:CO:Boulder	not entered	not entered	40.015	-105.27	not entered	not entered	not entered	Global FoodOmics_ONR_food	not applicable	not applicable	broccoli	host associated	plant	plant-corpus	no	Fp2	39739	not entered	not applicable	not applicable	not applicable
18NAVY28_v2_sup_2_rerun2_BH5_01_39793.mzXML	18NAVY28_v2_sup_2	Pound Cake Sara Lee,All Butter 8/14	complex	food	land	complex	complex	complex	complex	complex	complex	not applicable	not applicable	not applicable	not entered	not entered	not entered	not entered	not entered	not entered	FALSE	193	urban biome	anthropogenic environmental material	food product	misc environment	none	USA:CO:Boulder	not entered	not entered	40.015	-105.27	not entered	not entered	not entered	Global FoodOmics_ONR_food	not applicable	not applicable	cake	host associated	not applicable	not applicable	no	Fp2	39793	not entered	not applicable	not applicable	not applicable
18NAVY28_v2_sup_3_BA6_01_39746.mzXML	18NAVY28_v2_sup_3	Chicken Breast	complex	food	land	animal	animal	poultry	poultry	chicken	chicken	not applicable	not applicable	not applicable	not entered	not entered	not entered	not entered	not entered	not entered	FALSE	193	urban biome	anthropogenic environmental material	food product	misc environment	none	USA:CO:Boulder	not entered	not entered	40.015	-105.27	not entered	not entered	not entered	Global FoodOmics_ONR_food	not applicable	not applicable	meat	host associated	animal	animal-corpus	no	Fp2	39746	not entered	not applicable	not applicable	not applicable
18NAVY28_v2_sup_4_BB6_01_39743.mzXML	18NAVY28_v2_sup_4	Cheese Cheddar Shredded	complex	food	land	animal	animal	dairy	cheese	cheddar cheese	cheddar cheese	not applicable	not applicable	not applicable	not entered	not entered	not entered	not entered	not entered	not entered	FALSE	193	urban biome	anthropogenic environmental material	food product	misc environment	none	USA:CO:Boulder	not entered	not entered	40.015	-105.27	not entered	not entered	not entered	Global FoodOmics_ONR_food	not applicable	not applicable	cheese	host associated	not entered	not entered	not entered	Fp2	39743	not entered	not applicable	not applicable	not applicable
18NAVY28_v2_sup_5_BC6_01_39744.mzXML	18NAVY28_v2_sup_5	Grapes Red or Green	complex	food	land	plant	fruit	fleshy fruit	berry	grape	green grape	not applicable	not applicable	not applicable	not entered	not entered	not entered	not entered	not entered	not entered	FALSE	193	urban biome	anthropogenic environmental material	food product	misc environment	none	USA:CO:Boulder	not entered	not entered	40.015	-105.27	not entered	not entered	not entered	Global FoodOmics_ONR_food	not applicable	not applicable	grape	host-associated	plant	plant-corpus	no	Fp2	39744	not entered	not applicable	not applicable	not applicable
18NAVY28_v2_sup_6_rerun_BD6_01_39839.mzXML	18NAVY28_v2_sup_6	Butter, without salt 7/14	complex	food	land	animal	animal	dairy	butter	butter	butter	not applicable	not applicable	not applicable	not entered	not entered	not entered	not entered	not entered	not entered	FALSE	193	urban biome	anthropogenic environmental material	food product	misc environment	none	USA:CO:Boulder	not entered	not entered	40.015	-105.27	not entered	not entered	not entered	Global FoodOmics_ONR_food	not applicable	not applicable	butter	host-associated	animal	animal-secretion	no	Fp2	39839	not entered	not applicable	not applicable	not applicable
18NAVY28_v2_sup_7_BE6_01_39745.mzXML	18NAVY28_v2_sup_7	Potato Baked Flesh	complex	food	land	plant	vegetable/herb	vegetable/herb	vegetable	potato	potato	not applicable	not applicable	not applicable	not entered	not entered	not entered	not entered	not entered	not entered	FALSE	193	urban biome	anthropogenic environmental material	food product	misc environment	none	USA:CO:Boulder	not entered	not entered	40.015	-105.27	not entered	not entered	not entered	Global FoodOmics_ONR_food	not applicable	not applicable	potato	host-associated	plant	plant-corpus	no	Fp2	39745	not entered	not applicable	not applicable	not applicable
18NAVY28_V2_supper_GE6_01_39857.mzXML	18NAVY28_V2_supper	18NAVY28_V2_supper	complex	food	complex	complex	complex	complex	complex	complex	complex	complex	complex	complex	not entered	not entered	not entered	not entered	not entered	not entered	FALSE	193	urban biome	anthropogenic environmental material	food product	misc environment	none	USA:CO:Boulder	not entered	not entered	40.015	-105.27	not entered	not entered	not entered	Global FoodOmics_ONR_food	not applicable	not applicable	meal	host-associated	not applicable	not applicable	not entered	Fp_meal		not entered	not applicable	not applicable	not applicable
18NAVY30_V1_ALL_RC5_01_39875.mzXML	18NAVY30_V1_ALL	18NAVY30_V1_ALL	complex	food	complex	complex	complex	complex	complex	complex	complex	complex	complex	complex	not entered	not entered	not entered	not entered	not entered	not entered	FALSE	193	urban biome	anthropogenic environmental material	food product	misc environment	none	USA:CO:Boulder	not entered	not entered	40.015	-105.27	not entered	not entered	not entered	Global FoodOmics_ONR_food	not applicable	not applicable	meal	host-associated	not applicable	not applicable	not entered	Fp_meal		not entered	not applicable	not applicable	not applicable
18NAVY30_V1_breakfast_RC2_01_39861.mzXML	18NAVY30_V1_breakfast	18NAVY30_V1_breakfast	complex	food	complex	complex	complex	complex	complex	complex	complex	complex	complex	complex	not entered	not entered	not entered	not entered	not entered	not entered	FALSE	193	urban biome	anthropogenic environmental material	food product	misc environment	none	USA:CO:Boulder	not entered	not entered	40.015	-105.27	not entered	not entered	not entered	Global FoodOmics_ONR_food	not applicable	not applicable	meal	host-associated	not applicable	not applicable	not entered	Fp_meal		not entered	not applicable	not applicable	not applicable
18NAVY30_v1_brk_1_BG7_01_39777.mzXML	18NAVY30_v1_brk_1	egg liquid whole,Onion Raw,Peppers Green or Red,Oil Canola,Cheese Cheddar Shredded,Bread Whole Wheat , Aspen,Butter, without salt 7/14,Butter, without salt 7/14,Jelly - 8/14,Orange Juice 7/15	complex	food	land	complex	complex	complex	complex	complex	complex	not applicable	not applicable	not applicable	not entered	not entered	not entered	not entered	not entered	not entered	FALSE	193	urban biome	anthropogenic environmental material	food product	misc environment	none	USA:CO:Boulder	not entered	not entered	40.015	-105.27	not entered	not entered	not entered	Global FoodOmics_ONR_food	not applicable	not applicable	egg scramble	host associated	not applicable	not applicable	yes	Fp2	39777	not entered	not applicable	not applicable	not applicable
18NAVY30_v1_lun_1_BF8_01_39718.mzXML	18NAVY30_v1_lun_1	Dressing Ranch KRAFT 8/14	complex	food	land	complex	complex	complex	complex	complex	complex	not applicable	not applicable	not applicable	not entered	not entered	not entered	not entered	not entered	not entered	FALSE	193	urban biome	anthropogenic environmental material	food product	misc environment	none	USA:CO:Boulder	not entered	not entered	40.015	-105.27	not entered	not entered	not entered	Global FoodOmics_ONR_food	not applicable	not applicable	salad dressing	host associated	not entered	not entered	not entered	Fp2	39718	not entered	not applicable	not applicable	not applicable
18NAVY30_v1_lun_10_BG9_01_39721.mzXML	18NAVY30_v1_lun_10	Almonds, whole	complex	food	land	plant	fruit	fleshy fruit	drupe	almond	almond	not applicable	not applicable	not applicable	not entered	not entered	not entered	not entered	not entered	not entered	FALSE	193	urban biome	anthropogenic environmental material	food product	misc environment	none	USA:CO:Boulder	not entered	not entered	40.015	-105.27	not entered	not entered	not entered	Global FoodOmics_ONR_food	not applicable	not applicable	nut	host associated	plant	plant-corpus	no	Fp2	39721	not entered	not applicable	not applicable	not applicable
18NAVY30_v1_lun_11_BH9_01_39717.mzXML	18NAVY30_v1_lun_11	Lettuce Romaine,Dressing Ranch KRAFT 8/14	complex	food	land	plant	complex	complex	complex	complex	complex	not applicable	not applicable	not applicable	not entered	not entered	not entered	not entered	not entered	not entered	FALSE	193	urban biome	anthropogenic environmental material	food product	misc environment	none	USA:CO:Boulder	not entered	not entered	40.015	-105.27	not entered	not entered	not entered	Global FoodOmics_ONR_food	not applicable	not applicable	lettuce	host associated	plant	plant-corpus	no	Fp2	39717	not entered	not applicable	not applicable	not applicable
18NAVY30_v1_lun_2_BG8_01_39715.mzXML	18NAVY30_v1_lun_2	Pretzels Rold Gold-09/07	complex	food	land	complex	complex	complex	complex	complex	complex	not applicable	not applicable	not applicable	not entered	not entered	not entered	not entered	not entered	not entered	FALSE	193	urban biome	anthropogenic environmental material	food product	misc environment	none	USA:CO:Boulder	not entered	not entered	40.015	-105.27	not entered	not entered	not entered	Global FoodOmics_ONR_food	not applicable	not applicable	pretzel	host-associated	plant	plant-corpus	no	Fp2	39715	not entered	not applicable	not applicable	not applicable
18NAVY30_v1_lun_3_BH8_01_39719.mzXML	18NAVY30_v1_lun_3	Corn	complex	food	land	plant	fruit	grain/grass	grain/grass	corn	corn	not applicable	not applicable	not applicable	not entered	not entered	not entered	not entered	not entered	not entered	FALSE	193	urban biome	anthropogenic environmental material	food product	misc environment	none	USA:CO:Boulder	not entered	not entered	40.015	-105.27	not entered	not entered	not entered	Global FoodOmics_ONR_food	not applicable	not applicable	grain	host-associated	plant	plant-corpus	no	Fp2	39719	not entered	not applicable	not applicable	not applicable
18NAVY30_v1_lun_4_BA9_01_39708.mzXML	18NAVY30_v1_lun_4	Cucumber Raw	complex	food	land	plant	fruit	fleshy fruit	pepo	cucumber	cucumber	not applicable	not applicable	not applicable	not entered	not entered	not entered	not entered	not entered	not entered	FALSE	193	urban biome	anthropogenic environmental material	food product	misc environment	none	USA:CO:Boulder	not entered	not entered	40.015	-105.27	not entered	not entered	not entered	Global FoodOmics_ONR_food	not applicable	not applicable	cucumber	host-associated	plant	plant-corpus	no	Fp2	39708	not entered	not applicable	not applicable	not applicable
18NAVY30_v1_lun_5_BB9_01_39711.mzXML	18NAVY30_v1_lun_5	Raisins	complex	food	land	plant	fruit	fleshy fruit	berry	grape	grape	not applicable	not applicable	not applicable	not entered	not entered	not entered	not entered	not entered	not entered	FALSE	193	urban biome	anthropogenic environmental material	food product	misc environment	none	USA:CO:Boulder	not entered	not entered	40.015	-105.27	not entered	not entered	not entered	Global FoodOmics_ONR_food	not applicable	not applicable	raisin	host associated	plant	plant-corpus	no	Fp2	39711	not entered	not applicable	not applicable	not applicable
18NAVY30_v1_lun_6_BC9_01_39712.mzXML	18NAVY30_v1_lun_6	possibly a bell pepper but not in metadata	complex	food	land	plant	complex	complex	complex	complex	complex	not applicable	not applicable	not applicable	not entered	not entered	not entered	not entered	not entered	not entered	FALSE	193	urban biome	anthropogenic environmental material	food product	misc environment	none	USA:CO:Boulder	not entered	not entered	40.015	-105.27	not entered	not entered	not entered	Global FoodOmics_ONR_food	not applicable	not applicable	pepper	host associated	plant	plant-corpus	no	Fp2	39712	not entered	not applicable	not applicable	not applicable
18NAVY30_v1_lun_7_BD9_01_39713.mzXML	18NAVY30_v1_lun_7	Tomato Cherry	complex	food	land	plant	fruit	fleshy fruit	berry	tomato	tomato	not applicable	not applicable	not applicable	not entered	not entered	not entered	not entered	not entered	not entered	FALSE	193	urban biome	anthropogenic environmental material	food product	misc environment	none	USA:CO:Boulder	not entered	not entered	40.015	-105.27	not entered	not entered	not entered	Global FoodOmics_ONR_food	not applicable	not applicable	tomato	host-associated	plant	plant-corpus	no	Fp2	39713	not entered	not applicable	not applicable	not applicable
18NAVY30_v1_lun_8_BE9_01_39714.mzXML	18NAVY30_v1_lun_8	Grapes Red or Green	complex	food	land	plant	fruit	fleshy fruit	berry	grape	green grape	not applicable	not applicable	not applicable	not entered	not entered	not entered	not entered	not entered	not entered	FALSE	193	urban biome	anthropogenic environmental material	food product	misc environment	none	USA:CO:Boulder	not entered	not entered	40.015	-105.27	not entered	not entered	not entered	Global FoodOmics_ONR_food	not applicable	not applicable	grape	host-associated	plant	plant-corpus	no	Fp2	39714	not entered	not applicable	not applicable	not applicable
18NAVY30_v1_lun_9_BF9_01_39720.mzXML	18NAVY30_v1_lun_9	Chicken Breast	complex	food	land	animal	animal	poultry	poultry	chicken	chicken	not applicable	not applicable	not applicable	not entered	not entered	not entered	not entered	not entered	not entered	FALSE	193	urban biome	anthropogenic environmental material	food product	misc environment	none	USA:CO:Boulder	not entered	not entered	40.015	-105.27	not entered	not entered	not entered	Global FoodOmics_ONR_food	not applicable	not applicable	meat	host associated	animal	animal-corpus	no	Fp2	39720	not entered	not applicable	not applicable	not applicable
18NAVY30_V1_lunch_rerun_RC4_01_39880.mzXML	18NAVY30_V1_lunch	18NAVY30_V1_lunch	complex	food	complex	complex	complex	complex	complex	complex	complex	complex	complex	complex	not entered	not entered	not entered	not entered	not entered	not entered	FALSE	193	urban biome	anthropogenic environmental material	food product	misc environment	none	USA:CO:Boulder	not entered	not entered	40.015	-105.27	not entered	not entered	not entered	Global FoodOmics_ONR_food	not applicable	not applicable	meal	host-associated	not applicable	not applicable	not entered	Fp_meal		not entered	not applicable	not applicable	not applicable
18NAVY30_V1_snack_rerun_RC1_01_39879.mzXML	18NAVY30_V1_snack	18NAVY30_V1_snack	complex	food	complex	complex	complex	complex	complex	complex	complex	complex	complex	complex	not entered	not entered	not entered	not entered	not entered	not entered	FALSE	193	urban biome	anthropogenic environmental material	food product	misc environment	none	USA:CO:Boulder	not entered	not entered	40.015	-105.27	not entered	not entered	not entered	Global FoodOmics_ONR_food	not applicable	not applicable	meal	host-associated	not applicable	not applicable	not entered	Fp_meal		not entered	not applicable	not applicable	not applicable
18NAVY30_v1_snk_1_BE7_01_39768.mzXML	18NAVY30_v1_snk_1	Peanut Butter, Low Fat 8/14,Saltine Cracker	complex	food	land	plant	fruit	complex	complex	complex	complex	not applicable	not applicable	not applicable	not entered	not entered	not entered	not entered	not entered	not entered	FALSE	193	urban biome	anthropogenic environmental material	food product	misc environment	none	USA:CO:Boulder	not entered	not entered	40.015	-105.27	not entered	not entered	not entered	Global FoodOmics_ONR_food	not applicable	not applicable	peanut butter	host-associated	plant	plant-corpus	no	Fp2	39768	not entered	not applicable	not applicable	not applicable
18NAVY30_v1_snk_2_BF7_01_39767.mzXML	18NAVY30_v1_snk_2	Strawberries Fresh	complex	food	land	plant	fruit	fleshy fruit	pseudocarp	strawberry	strawberry	not applicable	not applicable	not applicable	not entered	not entered	not entered	not entered	not entered	not entered	FALSE	193	urban biome	anthropogenic environmental material	food product	misc environment	none	USA:CO:Boulder	not entered	not entered	40.015	-105.27	not entered	not entered	not entered	Global FoodOmics_ONR_food	not applicable	not applicable	berry	host-associated	plant	plant-corpus	no	Fp2	39767	not entered	not applicable	not applicable	not applicable
18NAVY30_v1_sup_1_BH7_01_39790.mzXML	18NAVY30_v1_sup_1	Beef Top Sirloin,Mexican Spice Mix,Oil Canola	complex	food	complex	complex	complex	complex	complex	complex	complex	not applicable	not applicable	not applicable	not entered	not entered	not entered	not entered	not entered	not entered	FALSE	193	urban biome	anthropogenic environmental material	food product	misc environment	none	USA:CO:Boulder	not entered	not entered	40.015	-105.27	not entered	not entered	not entered	Global FoodOmics_ONR_food	not applicable	not applicable	meat	host associated	animal	animal-corpus	no	Fp2	39790	not entered	not applicable	not applicable	not applicable
18NAVY30_v1_sup_2_BA8_01_39754.mzXML	18NAVY30_v1_sup_2	Black Beans, reduced sodium (Drained 9/14),Mexican Spice Mix,Oil Canola	complex	food	land	plant	complex	complex	complex	complex	black bean	not applicable	not applicable	not applicable	not entered	not entered	not entered	not entered	not entered	not entered	FALSE	193	urban biome	anthropogenic environmental material	food product	misc environment	none	USA:CO:Boulder	not entered	not entered	40.015	-105.27	not entered	not entered	not entered	Global FoodOmics_ONR_food	not applicable	not applicable	bean	host associated	plant	plant-corpus	no	Fp2	39754	not entered	not applicable	not applicable	not applicable
18NAVY30_v1_sup_3_BB8_01_39750.mzXML	18NAVY30_v1_sup_3	Peas Green,Mexican Spice Mix,Oil Canola	complex	food	land	plant	complex	complex	complex	complex	complex	not applicable	not applicable	not applicable	not entered	not entered	not entered	not entered	not entered	not entered	FALSE	193	urban biome	anthropogenic environmental material	food product	misc environment	none	USA:CO:Boulder	not entered	not entered	40.015	-105.27	not entered	not entered	not entered	Global FoodOmics_ONR_food	not applicable	not applicable	legume	host associated	plant	plant-corpus	no	Fp2	39750	not entered	not applicable	not applicable	not applicable
18NAVY30_v1_sup_4_BC8_01_39753.mzXML	18NAVY30_v1_sup_4	Corn,Mexican Spice Mix,Oil Canola	complex	food	land	plant	complex	complex	complex	complex	complex	not applicable	not applicable	not applicable	not entered	not entered	not entered	not entered	not entered	not entered	FALSE	193	urban biome	anthropogenic environmental material	food product	misc environment	none	USA:CO:Boulder	not entered	not entered	40.015	-105.27	not entered	not entered	not entered	Global FoodOmics_ONR_food	not applicable	not applicable	grain	host-associated	plant	plant-corpus	no	Fp2	39753	not entered	not applicable	not applicable	not applicable
18NAVY30_v1_sup_5_BD8_01_39788.mzXML	18NAVY30_v1_sup_5	Rice White, COOKED, Uncle Bens,Mexican Spice Mix,Oil Canola	complex	food	land	plant	fruit	grain/grass	grain/grass	rice	complex	not applicable	not applicable	not applicable	not entered	not entered	not entered	not entered	not entered	not entered	FALSE	193	urban biome	anthropogenic environmental material	food product	misc environment	none	USA:CO:Boulder	not entered	not entered	40.015	-105.27	not entered	not entered	not entered	Global FoodOmics_ONR_food	not applicable	not applicable	grain	host associated	plant	plant-corpus	no	Fp2	39788	not entered	not applicable	not applicable	not applicable
18NAVY30_v1_sup_6_BE8_01_39789.mzXML	18NAVY30_v1_sup_6	Onion Raw,Mexican Spice Mix,Oil Canola	complex	food	land	plant	complex	complex	complex	complex	complex	not applicable	not applicable	not applicable	not entered	not entered	not entered	not entered	not entered	not entered	FALSE	193	urban biome	anthropogenic environmental material	food product	misc environment	none	USA:CO:Boulder	not entered	not entered	40.015	-105.27	not entered	not entered	not entered	Global FoodOmics_ONR_food	not applicable	not applicable	onion	host associated	plant	plant-corpus	no	Fp2	39789	not entered	not applicable	not applicable	not applicable
18NAVY30_V1_supper_rerun_RC3_01_39881.mzXML	18NAVY30_V1_supper	18NAVY30_V1_supper	complex	food	complex	complex	complex	complex	complex	complex	complex	complex	complex	complex	not entered	not entered	not entered	not entered	not entered	not entered	FALSE	193	urban biome	anthropogenic environmental material	food product	misc environment	none	USA:CO:Boulder	not entered	not entered	40.015	-105.27	not entered	not entered	not entered	Global FoodOmics_ONR_food	not applicable	not applicable	meal	host-associated	not applicable	not applicable	not entered	Fp_meal		not entered	not applicable	not applicable	not applicable
18NAVY30_V2_ALL_GB7_01_39819.mzXML	18NAVY30_V2_ALL	18NAVY30_V2_ALL	complex	food	complex	complex	complex	complex	complex	complex	complex	complex	complex	complex	not entered	not entered	not entered	not entered	not entered	not entered	FALSE	193	urban biome	anthropogenic environmental material	food product	misc environment	none	USA:CO:Boulder	not entered	not entered	40.015	-105.27	not entered	not entered	not entered	Global FoodOmics_ONR_food	not applicable	not applicable	meal	host-associated	not applicable	not applicable	not entered	Fp_meal		not entered	not applicable	not applicable	not applicable
18NAVY30_V2_breakfast_GB4_01_39814.mzXML	18NAVY30_V2_breakfast	18NAVY30_V2_breakfast	complex	food	complex	complex	complex	complex	complex	complex	complex	complex	complex	complex	not entered	not entered	not entered	not entered	not entered	not entered	FALSE	193	urban biome	anthropogenic environmental material	food product	misc environment	none	USA:CO:Boulder	not entered	not entered	40.015	-105.27	not entered	not entered	not entered	Global FoodOmics_ONR_food	not applicable	not applicable	meal	host-associated	not applicable	not applicable	not entered	Fp_meal		not entered	not applicable	not applicable	not applicable
18NAVY30_v2_brk_1_GH5_01_39552.mzXML	18NAVY30_v2_brk_1	egg liquid whole,Onion Raw,Peppers Green or Red,Oil Canola,Cheese Cheddar Shredded,Bread Whole Wheat , Aspen,Butter, without salt 7/14,Butter, without salt 7/14,Jelly - 8/14,Orange Juice 7/15	complex	food	land	complex	complex	complex	complex	complex	complex	not applicable	not applicable	not applicable	not entered	not entered	not entered	not entered	not entered	not entered	FALSE	193	urban biome	anthropogenic environmental material	food product	misc environment	none	USA:CO:Boulder	not entered	not entered	40.015	-105.27	not entered	not entered	not entered	Global FoodOmics_ONR_food	not applicable	not applicable	egg scramble	host associated	not applicable	not applicable	yes	Fp1	39552	not entered	not applicable	not applicable	not applicable
18NAVY30_v2_lun_1_rerun_GG6_01_39675.mzXML	18NAVY30_v2_lun_1	Chicken Breast	complex	food	land	animal	animal	poultry	poultry	chicken	chicken	not applicable	not applicable	not applicable	not entered	not entered	not entered	not entered	not entered	not entered	FALSE	193	urban biome	anthropogenic environmental material	food product	misc environment	none	USA:CO:Boulder	not entered	not entered	40.015	-105.27	not entered	not entered	not entered	Global FoodOmics_ONR_food	not applicable	not applicable	meat	host associated	animal	animal-corpus	no	Fp1	39675	not entered	not applicable	not applicable	not applicable
18NAVY30_v2_lun_2_GH6_01_39633.mzXML	18NAVY30_v2_lun_2	Cucumber Raw	complex	food	land	plant	fruit	fleshy fruit	pepo	cucumber	cucumber	not applicable	not applicable	not applicable	not entered	not entered	not entered	not entered	not entered	not entered	FALSE	193	urban biome	anthropogenic environmental material	food product	misc environment	none	USA:CO:Boulder	not entered	not entered	40.015	-105.27	not entered	not entered	not entered	Global FoodOmics_ONR_food	not applicable	not applicable	cucumber	host-associated	plant	plant-corpus	no	Fp1	39633	not entered	not applicable	not applicable	not applicable
18NAVY30_v2_lun_3_GA7_01_39638.mzXML	18NAVY30_v2_lun_3	Pretzels Rold Gold-09/07	complex	food	land	complex	complex	complex	complex	complex	complex	not applicable	not applicable	not applicable	not entered	not entered	not entered	not entered	not entered	not entered	FALSE	193	urban biome	anthropogenic environmental material	food product	misc environment	none	USA:CO:Boulder	not entered	not entered	40.015	-105.27	not entered	not entered	not entered	Global FoodOmics_ONR_food	not applicable	not applicable	pretzel	host-associated	plant	plant-corpus	no	Fp1	39638	not entered	not applicable	not applicable	not applicable
18NAVY30_v2_lun_4_GB7_01_39634.mzXML	18NAVY30_v2_lun_4	Tomato Cherry, seed and peel	complex	food	land	plant	fruit	fleshy fruit	berry	tomato	tomato	not applicable	not applicable	not applicable	not entered	not entered	not entered	not entered	not entered	not entered	FALSE	193	urban biome	anthropogenic environmental material	food product	misc environment	none	USA:CO:Boulder	not entered	not entered	40.015	-105.27	not entered	not entered	not entered	Global FoodOmics_ONR_food	not applicable	not applicable	tomato	host-associated	plant	plant-corpus	no	Fp1	39634	not entered	not applicable	not applicable	not applicable
18NAVY30_v2_lun_5_GC7_01_39635.mzXML	18NAVY30_v2_lun_5	Grapes Red or Green	complex	food	land	plant	fruit	fleshy fruit	berry	grape	green grape	not applicable	not applicable	not applicable	not entered	not entered	not entered	not entered	not entered	not entered	FALSE	193	urban biome	anthropogenic environmental material	food product	misc environment	none	USA:CO:Boulder	not entered	not entered	40.015	-105.27	not entered	not entered	not entered	Global FoodOmics_ONR_food	not applicable	not applicable	grape	host-associated	plant	plant-corpus	no	Fp1	39635	not entered	not applicable	not applicable	not applicable
18NAVY30_v2_lun_6_GD7_01_39636.mzXML	18NAVY30_v2_lun_6	Corn	complex	food	land	plant	fruit	grain/grass	grain/grass	corn	corn	not applicable	not applicable	not applicable	not entered	not entered	not entered	not entered	not entered	not entered	FALSE	193	urban biome	anthropogenic environmental material	food product	misc environment	none	USA:CO:Boulder	not entered	not entered	40.015	-105.27	not entered	not entered	not entered	Global FoodOmics_ONR_food	not applicable	not applicable	grain	host-associated	plant	plant-corpus	no	Fp1	39636	not entered	not applicable	not applicable	not applicable
18NAVY30_v2_lun_7_GE7_01_39637.mzXML	18NAVY30_v2_lun_7	Raisins	complex	food	land	plant	fruit	fleshy fruit	berry	grape	grape	not applicable	not applicable	not applicable	not entered	not entered	not entered	not entered	not entered	not entered	FALSE	193	urban biome	anthropogenic environmental material	food product	misc environment	none	USA:CO:Boulder	not entered	not entered	40.015	-105.27	not entered	not entered	not entered	Global FoodOmics_ONR_food	not applicable	not applicable	raisin	host associated	plant	plant-corpus	no	Fp1	39637	not entered	not applicable	not applicable	not applicable
18NAVY30_v2_lun_8_GF7_01_39639.mzXML	18NAVY30_v2_lun_8	Almonds, whole	complex	food	land	plant	fruit	fleshy fruit	drupe	almond	almond	not applicable	not applicable	not applicable	not entered	not entered	not entered	not entered	not entered	not entered	FALSE	193	urban biome	anthropogenic environmental material	food product	misc environment	none	USA:CO:Boulder	not entered	not entered	40.015	-105.27	not entered	not entered	not entered	Global FoodOmics_ONR_food	not applicable	not applicable	nut	host associated	plant	plant-corpus	no	Fp1	39639	not entered	not applicable	not applicable	not applicable
18NAVY30_v2_lun_9_rerun_GG7_01_39674.mzXML	18NAVY30_v2_lun_9	Lettuce Romaine,Dressing Ranch KRAFT 8/14	complex	food	land	plant	complex	complex	complex	complex	complex	not applicable	not applicable	not applicable	not entered	not entered	not entered	not entered	not entered	not entered	FALSE	193	urban biome	anthropogenic environmental material	food product	misc environment	none	USA:CO:Boulder	not entered	not entered	40.015	-105.27	not entered	not entered	not entered	Global FoodOmics_ONR_food	not applicable	not applicable	lettuce	host associated	plant	plant-corpus	no	Fp1	39674	not entered	not applicable	not applicable	not applicable
18NAVY30_V2_lunch_GB6_01_39816.mzXML	18NAVY30_V2_lunch	18NAVY30_V2_lunch	complex	food	complex	complex	complex	complex	complex	complex	complex	complex	complex	complex	not entered	not entered	not entered	not entered	not entered	not entered	FALSE	193	urban biome	anthropogenic environmental material	food product	misc environment	none	USA:CO:Boulder	not entered	not entered	40.015	-105.27	not entered	not entered	not entered	Global FoodOmics_ONR_food	not applicable	not applicable	meal	host-associated	not applicable	not applicable	not entered	Fp_meal		not entered	not applicable	not applicable	not applicable
18NAVY30_V2_snack_GB3_01_39815.mzXML	18NAVY30_V2_snack	18NAVY30_V2_snack	complex	food	complex	complex	complex	complex	complex	complex	complex	complex	complex	complex	not entered	not entered	not entered	not entered	not entered	not entered	FALSE	193	urban biome	anthropogenic environmental material	food product	misc environment	none	USA:CO:Boulder	not entered	not entered	40.015	-105.27	not entered	not entered	not entered	Global FoodOmics_ONR_food	not applicable	not applicable	meal	host-associated	not applicable	not applicable	not entered	Fp_meal		not entered	not applicable	not applicable	not applicable
18NAVY30_v2_snk_1_GE5_01_39519.mzXML	18NAVY30_v2_snk_1	Peanut Butter, Low Fat 8/14	complex	food	land	plant	fruit	legume	legume	peanut	peanut	not applicable	not applicable	not applicable	not entered	not entered	not entered	not entered	not entered	not entered	FALSE	193	urban biome	anthropogenic environmental material	food product	misc environment	none	USA:CO:Boulder	not entered	not entered	40.015	-105.27	not entered	not entered	not entered	Global FoodOmics_ONR_food	not applicable	not applicable	peanut butter	host-associated	plant	plant-corpus	no	Fp1	39519	not entered	not applicable	not applicable	not applicable
18NAVY30_v2_snk_2_GF5_01_39520.mzXML	18NAVY30_v2_snk_2	Saltine Cracker	complex	food	land	plant	complex	complex	complex	complex	complex	not applicable	not applicable	not applicable	not entered	not entered	not entered	not entered	not entered	not entered	FALSE	193	urban biome	anthropogenic environmental material	food product	misc environment	none	USA:CO:Boulder	not entered	not entered	40.015	-105.27	not entered	not entered	not entered	Global FoodOmics_ONR_food	not applicable	not applicable	cracker	host associated	plant	plant-corpus	no	Fp1	39520	not entered	not applicable	not applicable	not applicable
18NAVY30_v2_snk_3_GG5_01_39521.mzXML	18NAVY30_v2_snk_3	Strawberries Fresh	complex	food	land	plant	fruit	fleshy fruit	pseudocarp	strawberry	strawberry	not applicable	not applicable	not applicable	not entered	not entered	not entered	not entered	not entered	not entered	FALSE	193	urban biome	anthropogenic environmental material	food product	misc environment	none	USA:CO:Boulder	not entered	not entered	40.015	-105.27	not entered	not entered	not entered	Global FoodOmics_ONR_food	not applicable	not applicable	berry	host-associated	plant	plant-corpus	no	Fp1	39521	not entered	not applicable	not applicable	not applicable
18NAVY30_v2_sup_1_GA6_01_39591.mzXML	18NAVY30_v2_sup_1	Peas Green,Mexican Spice Mix,Oil Canola	complex	food	land	plant	complex	complex	complex	complex	complex	not applicable	not applicable	not applicable	not entered	not entered	not entered	not entered	not entered	not entered	FALSE	193	urban biome	anthropogenic environmental material	food product	misc environment	none	USA:CO:Boulder	not entered	not entered	40.015	-105.27	not entered	not entered	not entered	Global FoodOmics_ONR_food	not applicable	not applicable	legume	host associated	plant	plant-corpus	no	Fp1	39591	not entered	not applicable	not applicable	not applicable
18NAVY30_v2_sup_2_GB6_01_39592.mzXML	18NAVY30_v2_sup_2	Corn,Mexican Spice Mix,Oil Canola	complex	food	land	plant	complex	complex	complex	complex	complex	not applicable	not applicable	not applicable	not entered	not entered	not entered	not entered	not entered	not entered	FALSE	193	urban biome	anthropogenic environmental material	food product	misc environment	none	USA:CO:Boulder	not entered	not entered	40.015	-105.27	not entered	not entered	not entered	Global FoodOmics_ONR_food	not applicable	not applicable	grain	host-associated	plant	plant-corpus	no	Fp1	39592	not entered	not applicable	not applicable	not applicable
18NAVY30_v2_sup_3_GC6_01_39596.mzXML	18NAVY30_v2_sup_3	Black Beans, reduced sodium (Drained 9/14),Mexican Spice Mix,Oil Canola	complex	food	land	plant	complex	complex	complex	complex	black bean	not applicable	not applicable	not applicable	not entered	not entered	not entered	not entered	not entered	not entered	FALSE	193	urban biome	anthropogenic environmental material	food product	misc environment	none	USA:CO:Boulder	not entered	not entered	40.015	-105.27	not entered	not entered	not entered	Global FoodOmics_ONR_food	not applicable	not applicable	bean	host associated	plant	plant-corpus	no	Fp1	39596	not entered	not applicable	not applicable	not applicable
18NAVY30_v2_sup_4_GD6_01_39594.mzXML	18NAVY30_v2_sup_4	Rice White, COOKED, Uncle Bens,Mexican Spice Mix,Oil Canola	complex	food	land	plant	fruit	grain/grass	grain/grass	rice	complex	not applicable	not applicable	not applicable	not entered	not entered	not entered	not entered	not entered	not entered	FALSE	193	urban biome	anthropogenic environmental material	food product	misc environment	none	USA:CO:Boulder	not entered	not entered	40.015	-105.27	not entered	not entered	not entered	Global FoodOmics_ONR_food	not applicable	not applicable	grain	host associated	plant	plant-corpus	no	Fp1	39594	not entered	not applicable	not applicable	not applicable
18NAVY30_v2_sup_5_GE6_01_39595.mzXML	18NAVY30_v2_sup_5	Onion Raw,Mexican Spice Mix,Oil Canola	complex	food	land	plant	complex	complex	complex	complex	complex	not applicable	not applicable	not applicable	not entered	not entered	not entered	not entered	not entered	not entered	FALSE	193	urban biome	anthropogenic environmental material	food product	misc environment	none	USA:CO:Boulder	not entered	not entered	40.015	-105.27	not entered	not entered	not entered	Global FoodOmics_ONR_food	not applicable	not applicable	onion	host associated	plant	plant-corpus	no	Fp1	39595	not entered	not applicable	not applicable	not applicable
18NAVY30_v2_sup_6_rerun_GF6_01_39603.mzXML	18NAVY30_v2_sup_6	Beef Top Sirloin,Mexican Spice Mix,Oil Canola	complex	food	complex	complex	complex	complex	complex	complex	complex	not applicable	not applicable	not applicable	not entered	not entered	not entered	not entered	not entered	not entered	FALSE	193	urban biome	anthropogenic environmental material	food product	misc environment	none	USA:CO:Boulder	not entered	not entered	40.015	-105.27	not entered	not entered	not entered	Global FoodOmics_ONR_food	not applicable	not applicable	meat	host associated	animal	animal-corpus	no	Fp1	39603	not entered	not applicable	not applicable	not applicable
18NAVY30_V2_supper_GB5_01_39817.mzXML	18NAVY30_V2_supper	18NAVY30_V2_supper	complex	food	complex	complex	complex	complex	complex	complex	complex	complex	complex	complex	not entered	not entered	not entered	not entered	not entered	not entered	FALSE	193	urban biome	anthropogenic environmental material	food product	misc environment	none	USA:CO:Boulder	not entered	not entered	40.015	-105.27	not entered	not entered	not entered	Global FoodOmics_ONR_food	not applicable	not applicable	meal	host-associated	not applicable	not applicable	not entered	Fp_meal		not entered	not applicable	not applicable	not applicable
72442_1x_BD9_01_17436.mzXML	11442.G72442	pea in chicken biryani	complex	food	land	complex	complex	complex	complex	complex	complex	not applicable	not applicable	not applicable	cooked	Pisum	Pisum sp.	fruit	Fabaceae	2017-04-30 21:00:00	TRUE	193	urban biome	anthropogenic environmental material	food product	misc environment	lt. yellow/green	USA:CA:San Diego	not entered	not entered	32.842	-117.258	food metagenome	not entered	870726	Global FoodOmics	not entered	not entered	chicken biryani	host-associated	plant	plant-corpus	no	12	not provided	no	not applicable	not applicable	not applicable
72443_1x_BE8_01_17448.mzXML	11442.G72443	carrot in chicken biryani	complex	food	land	complex	complex	complex	complex	complex	complex	not applicable	not applicable	not applicable	cooked	Daucus	Daucus carota	root	Apiaceae	2017-04-30 21:00:00	TRUE	193	urban biome	anthropogenic environmental material	food product	misc environment	lt. orange	USA:CA:San Diego	not entered	not entered	32.842	-117.258	food metagenome	not entered	870726	Global FoodOmics	not entered	not entered	chicken biryani	host-associated	plant	plant-corpus	no	12	not provided	no	not applicable	not applicable	not applicable
72444_1x_BD8_01_17435.mzXML	11442.G72444	persian cucumber in chicken biryani	complex	food	land	plant	fruit	fleshy fruit	pepo	cucumber	cucumber	not applicable	not applicable	not applicable	not applicable	Cucumis	Cucumis sp.	fruit	Cucurbitaceae	2017-04-30 21:00:00	TRUE	193	urban biome	anthropogenic environmental material	food product	misc environment	lt. green	USA:CA:San Diego	not entered	not entered	32.842	-117.258	food metagenome	not entered	870726	Global FoodOmics	not entered	not entered	chicken biryani	host-associated	plant	plant-corpus	no	12	not provided	no	not applicable	not applicable	not applicable
72445_1x_BC8_01_17426.mzXML	11442.G72445	raw tomato in chicken biryani	complex	food	land	plant	fruit	fleshy fruit	berry	tomato	tomato	not applicable	not applicable	not applicable	not applicable	Solanum	Solanum sp.	fruit	Solanaceae	2017-04-30 21:00:00	TRUE	193	urban biome	anthropogenic environmental material	food product	misc environment	lt red	USA:CA:San Diego	not entered	not entered	32.842	-117.258	food metagenome	not entered	870726	Global FoodOmics	not entered	not entered	chicken biryani	host-associated	plant	plant-corpus	no	12	not provided	no	not applicable	not applicable	not applicable
72475_1x_BC9_01_17418.mzXML	11442.G72475	garlic	simple	food	land	plant	vegetable/herb	vegetable/herb	vegetable	garlic	garlic	not applicable	not applicable	not applicable	not applicable	Allium	Allium sativum	stem	Amaryllidaceae	2017-04-30 22:09:00	TRUE	193	urban biome	anthropogenic environmental material	food product	misc environment	none	USA:CA:San Diego	not entered	not entered	32.842	-117.258	food metagenome	not entered	870726	Global FoodOmics	not entered	not entered	spice	host-associated	plant	plant-corpus	no	12	not provided	no	not applicable	not applicable	not applicable
72497_1x_BD7_01_17434.mzXML	11442.G72497	melon, galia	simple	food	land	plant	fruit	fleshy fruit	pepo	melon	galia	not applicable	not applicable	not applicable	not applicable	Cucumis	Cucumis sp.	fruit	Cucurbitaceae	2017-06-18 15:07:00	TRUE	193	urban biome	anthropogenic environmental material	food product	misc environment	none	USA:CA:San Diego	not entered	not entered	32.842	-117.258	food metagenome	not entered	870726	Global FoodOmics	not entered	not entered	melon	host-associated	plant	plant-corpus	no	12	not provided	no	not applicable	not applicable	not applicable
72500_1x_BG3_01_17471.mzXML	11442.G72500	apple sauce, organic	simple	food	land	plant	fruit	fleshy fruit	pome	apple	apple	not applicable	not applicable	not applicable	cooked	Malus	Malus sp.	fruit	Rosaceae	2017-06-18 21:06:00	TRUE	193	urban biome	anthropogenic environmental material	food product	misc environment	none	USA:CA:San Diego	not entered	not entered	32.842	-117.258	food metagenome	not entered	870726	Global FoodOmics	not entered	not entered	apple sauce	host-associated	plant	plant-corpus	no	12	not provided	no	not applicable	not applicable	not applicable
72504_1x_BH8_01_17502.mzXML	11442.G72504	turkish fig	simple	food	land	plant	fruit	fleshy fruit	multifruit	fig	turkish fig	not applicable	not applicable	not applicable	dried	Ficus	Ficus sp.	fruit	Moraceae	2017-04-30 22:15:00	TRUE	193	urban biome	anthropogenic environmental material	food product	misc environment	none	USA:CA:San Diego	not entered	not entered	32.842	-117.258	food metagenome	not entered	870726	Global FoodOmics	not entered	not entered	fig	host-associated	plant	plant-corpus	no	12	not provided	no	not applicable	not applicable	not applicable
72507_1x_BH9_01_17503.mzXML	11442.G72507	dulse, organic	simple	food	aquatic	algae	algae	seaweed	seaweed	dulse	dulse	not applicable	not applicable	not applicable	dried, low temperature	Palmaria	not applicable	algae	Palmariaceae	2017-04-30 22:15:00	TRUE	193	urban biome	anthropogenic environmental material	food product	misc environment	none	USA:CA:San Diego	not entered	not entered	32.842	-117.258	food metagenome	not entered	870726	Global FoodOmics	not entered	not entered	seaweed	free-living	saline	water (non-saline) (saline)	no	12	not provided	no	not applicable	not applicable	not applicable
72537_1x_BG5_01_17486.mzXML	11442.G72537	orange cherry tomato	simple	food	land	plant	fruit	fleshy fruit	berry	tomato	orange cherry tomato	not applicable	not applicable	not applicable	not applicable	Solanum	Solanum lycopersicum	fruit	Solanaceae	2017-05-02 19:00:00	TRUE	193	urban biome	anthropogenic environmental material	food product	misc environment	none	USA:CA:San Diego	not entered	not entered	32.842	-117.258	food metagenome	not entered	870726	Global FoodOmics	not entered	not entered	tomato	host-associated	plant	plant-corpus	no	12	not provided	no	not applicable	not applicable	not applicable
72538_1x_BB6_01_17402.mzXML	11442.G72538	napa cabbage	simple	food	land	plant	vegetable/herb	vegetable/herb	flower	cabbage	napa cabbage	not applicable	not applicable	not applicable	not applicable	Brassica	Brassica sp.	leaf	Brassicaceae	2017-05-02 19:00:00	TRUE	193	urban biome	anthropogenic environmental material	food product	misc environment	none	USA:CA:San Diego	not entered	not entered	32.842	-117.258	food metagenome	not entered	870726	Global FoodOmics	not entered	not entered	cabbage	host-associated	plant	plant-corpus	no	12	not provided	no	not applicable	not applicable	not applicable
72540_1x_BB8_01_17404.mzXML	11442.G72540	watermelon (spilled a bit of EtOH)	simple	food	land	plant	fruit	fleshy fruit	pepo	melon	watermelon	not applicable	not applicable	not applicable	not applicable	citrullus	citrullus sp.	fruit	Cucurbitaceae	2017-05-02 19:00:00	TRUE	193	urban biome	anthropogenic environmental material	food product	misc environment	pink	USA:CA:San Diego	not entered	not entered	32.842	-117.258	food metagenome	not entered	870726	Global FoodOmics	not entered	not entered	melon	host-associated	plant	plant-corpus	no	12	not provided	no	not applicable	not applicable	not applicable
72657_1x_BE5_01_17445.mzXML	11442.G72657	bartlett pear	simple	food	land	plant	fruit	fleshy fruit	pome	pear	barlett pear	not applicable	not applicable	not applicable	not applicable	pyrus	pyrus sp.	fruit	Rosaceae	2017-05-17 08:00:00	TRUE	193	urban biome	anthropogenic environmental material	food product	misc environment	none	USA:CA:San Diego	not entered	not entered	32.842	-117.258	food metagenome	not entered	870726	Global FoodOmics	not entered	not entered	pear	host-associated	plant	plant-corpus	no	12	not provided	no	not applicable	not applicable	not applicable
72662_1x_BB3_01_17399.mzXML	11442.G72662	Dark morello cherry (preserved in "light syrup")	complex	food	land	plant	fruit	fleshy fruit	drupe	cherry	cherry	not applicable	not applicable	not applicable	preserved with syrup	Prunus	Prunus cerasus	fruit	Rosaceae	2017-06-21 16:40:00	TRUE	193	urban biome	anthropogenic environmental material	food product	misc environment	pink	USA:CA:San Diego	not entered	not entered	32.842	-117.258	food metagenome	not entered	870726	Global FoodOmics	not entered	not entered	preserved fruit	host-associated	plant	plant-corpus	no	12	not provided	no	not applicable	not applicable	not applicable
72665_5x_RD5_01_17476.mzXML	11442.G72665	cherry, farmer's market	simple	food	land	plant	fruit	fleshy fruit	drupe	cherry	cherry	not applicable	not applicable	not applicable	not applicable	Prunus	Prunus sp.	fruit	Rosaceae	2017-05-23 15:59:00	TRUE	193	urban biome	anthropogenic environmental material	food product	misc environment	none	USA:CA:San Diego	not entered	not entered	32.842	-117.258	food metagenome	not entered	870726	Global FoodOmics	not entered	not entered	stone fruit	host-associated	plant	plant-corpus	no	12	not provided	no	not applicable	not applicable	not applicable
72666_1x_BC5_01_17414.mzXML	11442.G72666	apricot, farmer's market	simple	food	land	plant	fruit	fleshy fruit	drupe	apricot	apricot	not applicable	not applicable	not applicable	not applicable	Prunus	Prunus sp.	fruit	Rosaceae	2017-05-23 15:59:00	TRUE	193	urban biome	anthropogenic environmental material	food product	misc environment	none	USA:CA:San Diego	not entered	not entered	32.842	-117.258	food metagenome	not entered	870726	Global FoodOmics	not entered	not entered	stone fruit	host-associated	plant	plant-corpus	no	12	not provided	no	not applicable	not applicable	not applicable
72671_1x_BD12_01_17439.mzXML	11442.G72671	Simple truth organic basil leaves	simple	food	land	plant	vegetable/herb	vegetable/herb	herb/spice	basil	basil	not applicable	not applicable	not applicable	dried	ocimum	ocimum basilicum	leaf	Lamiaceae	2017-05-19	TRUE	193	urban biome	anthropogenic environmental material	food product	misc environment	none	USA:CA:San Diego	not entered	not entered	32.842	-117.258	food metagenome	not entered	870726	Global FoodOmics	not entered	not entered	herb	host-associated	plant	plant-corpus	no	12	not provided	no	not applicable	not applicable	not applicable
72673_1x_BE7_01_17447.mzXML	11442.G72673	Orange Peel	simple	food	land	plant	fruit	fleshy fruit	citrus	orange	orange	not applicable	not applicable	not applicable	not applicable	Citrus	Citrus sp.	fruit	Rutaceae	2017-05-19	TRUE	193	urban biome	anthropogenic environmental material	food product	misc environment	none	USA:CA:San Diego	not entered	not entered	32.842	-117.258	food metagenome	not entered	870726	Global FoodOmics	not entered	not entered	orange	host-associated	plant	plant-surface	no	12	not provided	no	not applicable	not applicable	not applicable
72674_1x_BG4_01_17472.mzXML	11442.G72674	Orange fruit	simple	food	land	plant	fruit	fleshy fruit	citrus	orange	orange	not applicable	not applicable	not applicable	not applicable	Citrus	Citrus sp.	fruit	Rutaceae	2017-05-19	TRUE	193	urban biome	anthropogenic environmental material	food product	misc environment	solution orange	USA:CA:San Diego	not entered	not entered	32.842	-117.258	food metagenome	not entered	870726	Global FoodOmics	not entered	not entered	orange	host-associated	plant	plant-corpus	no	12	not provided	no	not applicable	not applicable	not applicable
72675_1x_BC3_01_17412.mzXML	11442.G72675	Sun Maid Raisin	simple	food	land	plant	fruit	fleshy fruit	berry	grape	grape	not applicable	not applicable	not applicable	dried	Vitis	Vitis sp.	fruit	Vitaceae	2017-05-19	TRUE	193	urban biome	anthropogenic environmental material	food product	misc environment	none	USA:CA:San Diego	not entered	not entered	32.842	-117.258	food metagenome	not entered	870726	Global FoodOmics	not entered	not entered	raisin	host-associated	plant	plant-corpus	no	12	not provided	not collected	not collected	not applicable	not applicable
72684_1x_BF5_01_17479.mzXML	11442.G72684	lettuce from salad	complex	food	land	plant	vegetable/herb	vegetable/herb	vegetable	lettuce	lettuce	not applicable	not applicable	not applicable	raw (mixed in salad)	Lactuca	Lactuca sp.	leaf	Asteraceae	2017-05-03 12:45:00	TRUE	193	urban biome	anthropogenic environmental material	food product	misc environment	none	USA:CA:San Diego	not entered	not entered	32.842	-117.258	food metagenome	not entered	870726	Global FoodOmics	not entered	not entered	lettuce	host-associated	plant	plant-corpus	no	12	not provided	no	not applicable	not applicable	not applicable
72717_5x_RG9_01_17512.mzXML	11442.G72717	matcha green tea	simple	food	land	plant	vegetable/herb	vegetable/herb	tea/infusion	tea	matcha green tea	not applicable	not applicable	not applicable	dried	Camellia	Camellia sp.	leaf	Theaceae	2017-06-18	TRUE	193	urban biome	anthropogenic environmental material	food product	misc environment	none	USA:CA:San Diego	not entered	not entered	32.842	-117.258	food fermentation metagenome	not entered	1154581	Global FoodOmics	not entered	not entered	tea	host-associated	plant	plant-corpus	yes	12	not provided	no	not applicable	not applicable	not applicable
72790_5x_RG6_01_17487.mzXML	11442.G72790	Organic Blueberries, Driscoll's	simple	food	land	plant	fruit	fleshy fruit	berry	blueberry	blueberry	not applicable	not applicable	not applicable	not applicable	vaccinium	vaccinium sp.	fruit	Ericaceae	2017-05-14 15:22:00	TRUE	193	urban biome	anthropogenic environmental material	food product	misc environment	none	USA:CA:San Diego	not entered	not entered	32.842	-117.258	food metagenome	not entered	870726	Global FoodOmics	not entered	not entered	berry	host-associated	plant	plant-corpus	no	12	not provided	no	not applicable	not applicable	not applicable
72798_1x_BH4_01_17498.mzXML	11442.G72798	Spinach, baby spinach, simple truth brand	simple	food	land	plant	vegetable/herb	vegetable/herb	vegetable	spinach	spinach	not applicable	not applicable	not applicable	not applicable	spinacia	Spinacia oleracea	leaf	Amaranthaceae	2017-05-14 15:45:00	TRUE	193	urban biome	anthropogenic environmental material	food product	misc environment	none	USA:CA:San Diego	not entered	not entered	32.842	-117.258	food metagenome	not entered	870726	Global FoodOmics	not entered	not entered	spinach	host-associated	plant	plant-corpus	no	12	not provided	no	not applicable	not applicable	not applicable
72799_1x_BF7_01_17460.mzXML	11442.G72799	Cut N Clean Greens Kale	simple	food	land	plant	vegetable/herb	vegetable/herb	vegetable	kale	kale	not applicable	not applicable	not applicable	not applicable	Brassica	Brassica oleracea	leaf	Brassicaceae	2017-05-14 15:46:00	TRUE	193	urban biome	anthropogenic environmental material	food product	misc environment	none	USA:CA:San Diego	not entered	not entered	32.842	-117.258	food metagenome	not entered	870726	Global FoodOmics	not entered	not entered	kale	host-associated	plant	plant-corpus	no	12	not provided	no	not applicable	not applicable	not applicable
72802_1x_BD11_01_17438.mzXML	11442.G72802	red bell pepper	simple	food	land	plant	fruit	fleshy fruit	berry	pepper	red bell pepper	not applicable	not applicable	not applicable	not applicable	Capsicum	Capsicum annuum	fruit	Solanaceae	2017-05-17 23:00:00	TRUE	193	urban biome	anthropogenic environmental material	food product	misc environment	orange	USA:CA:San Diego	not entered	not entered	32.842	-117.258	food metagenome	not entered	870726	Global FoodOmics	not entered	not entered	pepper	host-associated	plant	plant-corpus	no	12	not provided	no	not collected	not applicable	not applicable
73471_1x_rerun_BA4_01_21391.mzXML	11442.G73471	apple cider vinegar	complex	food	land	plant	fruit	fleshy fruit	pome	apple	apple	non-alcoholic	non-carbonated	vinegar	processed	not applicable	not applicable	not applicable	not collected	2017-10-02 21:30:00	TRUE	193	urban biome	anthropogenic environmental material	food product	misc environment	none	USA:CA:San Diego	not entered	not entered	32.842	-117.258	food fermentation metagenome	not entered	1154581	Global FoodOmics	not entered	not entered	vinegar	host-associated	plant	plant-corpus	yes	18	not provided	no	not applicable	not applicable	not applicable
73472_1x_BC4_01_20736.mzXML	11442.G73472	rice vinegar	complex	food	land	plant	fruit	grain/grass	grain/grass	rice	rice	non-alcoholic	non-carbonated	vinegar	processed	oryza	oryza sp.	seed	Poaceae	2017-10-02 21:25:00	TRUE	193	urban biome	anthropogenic environmental material	food product	misc environment	none	USA:CA:San Diego	not entered	not entered	32.842	-117.258	food fermentation metagenome	not entered	1154581	Global FoodOmics	not entered	not entered	vinegar	host-associated	plant	plant-corpus	yes	18	not provided	no	not applicable	not applicable	not applicable
73477_1x_12ul_rerun_BB4_01_21455.mzXML	11442.G73477	balsamic vinegar	complex	food	land	plant	fruit	fleshy fruit	berry	grape	balsamic vinegar	non-alcoholic	non-carbonated	vinegar	processed	Vitis	Vitis sp.	fruit	Vitaceae	2017-10-02 21:30:00	TRUE	193	urban biome	anthropogenic environmental material	food product	misc environment	none	USA:CA:San Diego	not entered	not entered	32.842	-117.258	food metagenome	not entered	870726	Global FoodOmics	not entered	not entered	vinegar	host-associated	plant	plant-corpus	no	18	not provided	no	not applicable	not applicable	not applicable
73492_1x_BF3_01_21384.mzXML	11442.G73492	kombucha, homemade 2ndary fruit ferment, red fruit	complex	beverage	land	plant	vegetable/herb	vegetable/herb	tea/infusion	kombucha	kombucha	non-alcoholic	carbonated	kombucha	fermented	Camellia	Camellia sp.	leaf	Theaceae	2017-08-23 09:19:00	TRUE	193	urban biome	anthropogenic environmental material	food product	misc environment	none	USA:CA:San Diego	not entered	not entered	32.842	-117.258	food fermentation metagenome	not entered	1154581	Global FoodOmics	not entered	not entered	kombucha	host-associated	plant	plant-corpus	yes	18	not provided	no	not applicable	not applicable	not applicable
73493_1x_BD3_01_20743.mzXML	11442.G73493	kombucha, homemade	complex	beverage	land	plant	vegetable/herb	vegetable/herb	tea/infusion	kombucha	kombucha	non-alcoholic	carbonated	kombucha	fermented	Camellia	Camellia sp.	leaf	Theaceae	2017-08-23 09:20:00	TRUE	193	urban biome	anthropogenic environmental material	food product	misc environment	none	USA:CA:San Diego	not entered	not entered	32.842	-117.258	food fermentation metagenome	not entered	1154581	Global FoodOmics	not entered	not entered	kombucha	host-associated	plant	plant-corpus	yes	18	not provided	no	not applicable	not applicable	not applicable
73494_1x_rerun_BD2_01_21380.mzXML	11442.G73494	kombucha, homemade	complex	beverage	land	plant	vegetable/herb	vegetable/herb	tea/infusion	kombucha	kombucha	non-alcoholic	carbonated	kombucha	fermented	Camellia	Camellia sp.	leaf	Theaceae	2017-08-23 09:20:00	TRUE	193	urban biome	anthropogenic environmental material	food product	misc environment	none	USA:CA:San Diego	not entered	not entered	32.842	-117.258	food fermentation metagenome	not entered	1154581	Global FoodOmics	not entered	not entered	kombucha	host-associated	plant	plant-corpus	yes	18	not provided	no	not applicable	not applicable	not applicable
73495_1x_BC3_01_20735.mzXML	11442.G73495	kombucha, homemade 2ndary fruit ferment, mango	complex	beverage	land	plant	vegetable/herb	vegetable/herb	tea/infusion	kombucha	kombucha	non-alcoholic	carbonated	kombucha	fermented	Camellia	Camellia sp.	leaf	Theaceae	2017-08-23 09:21:00	TRUE	193	urban biome	anthropogenic environmental material	food product	misc environment	none	USA:CA:San Diego	not entered	not entered	32.842	-117.258	food fermentation metagenome	not entered	1154581	Global FoodOmics	not entered	not entered	kombucha	host-associated	plant	plant-corpus	yes	18	not provided	no	not applicable	not applicable	not applicable
73496_1x_BH8_01_20782.mzXML	11442.G73496	fish sauce	complex	food	aquatic	animal	animal	seafood	fish_saltwater	anchovy	anchovy	not applicable	not applicable	not applicable	processed	not applicable	not applicable	not applicable	not collected	2017-09-10	TRUE	193	urban biome	anthropogenic environmental material	food product	misc environment	none	USA:CA:San Diego	not entered	not entered	32.842	-117.258	food fermentation metagenome	not entered	1154581	Global FoodOmics	not entered	not entered	sauce	host-associated	animal	animal-corpus	yes	18	not provided	no	not applicable	not applicable	not applicable
73497_1x_BH3_01_20777.mzXML	11442.G73497	tea black, green, sugar	complex	beverage	land	plant	vegetable/herb	vegetable/herb	tea/infusion	tea	tea	non-alcoholic	non-carbonated	tea	fermented	Camellia	Camellia sp.	leaf	Theaceae	2017-08-23 09:00:00	TRUE	193	urban biome	anthropogenic environmental material	food product	misc environment	none	USA:CA:San Diego	not entered	not entered	32.842	-117.258	food fermentation metagenome	not entered	1154581	Global FoodOmics	not entered	not entered	tea	host-associated	plant	plant-corpus	yes	18	not provided	no	not applicable	not applicable	not applicable
73502_1x_BH5_01_20779.mzXML	11442.G73502	everberry probiotic smoothie	complex	beverage	land	plant	fruit	fleshy fruit	complex	complex	complex	non-alcoholic	non-carbonated	smoothie	processed	not applicable	not applicable	not applicable	not collected	2017-10-01 23:00:00	TRUE	193	urban biome	anthropogenic environmental material	food product	misc environment	none	USA:CA:San Diego	not entered	not entered	32.842	-117.258	food fermentation metagenome	not entered	1154581	Global FoodOmics	not entered	not entered	smoothie	host-associated	plant	plant-corpus	no	18	not provided	no	not applicable	not applicable	not applicable
73503_1x_BE5_01_20753.mzXML	11442.G73503	blueberry kefir	complex	beverage	land	complex	complex	complex	complex	complex	complex	non-alcoholic	non-carbonated	kefir	fermented	not applicable	not applicable	not applicable	not collected	2017-10-01 23:22:00	TRUE	193	urban biome	anthropogenic environmental material	food product	misc environment	none	USA:CA:San Diego	not entered	not entered	32.842	-117.258	food fermentation metagenome	not entered	1154581	Global FoodOmics	not entered	not entered	fermented liquid	host-associated	animal	animal-secretion	yes	18	not provided	natural	blueberry	not applicable	not applicable
73504_1x_BD5_01_20745.mzXML	11442.G73504	mango kefir	complex	beverage	land	complex	complex	complex	complex	complex	complex	non-alcoholic	non-carbonated	kefir	fermented	not applicable	not applicable	not applicable	not collected	2017-10-01 23:22:00	TRUE	193	urban biome	anthropogenic environmental material	food product	misc environment	none	USA:CA:San Diego	not entered	not entered	32.842	-117.258	food fermentation metagenome	not entered	1154581	Global FoodOmics	not entered	not entered	fermented liquid	host-associated	animal	animal-secretion	yes	18	not provided	natural	mango	not applicable	not applicable
73507_1x_BG4_01_20769.mzXML	11442.G73507	bai antioxidant cocofusion	complex	beverage	land	plant	fruit	fleshy fruit	drupe	coconut	coconut	non-alcoholic	non-carbonated	water	processed	not applicable	not applicable	not applicable	not collected	2017-10-02	TRUE	193	urban biome	anthropogenic environmental material	food product	misc environment	none	USA:CA:San Diego	not entered	not entered	32.842	-117.258	food fermentation metagenome	not entered	1154581	Global FoodOmics	not entered	not entered	antioxidant drink	host-associated	plant	plant-corpus	yes	18	not provided	no	not applicable	not applicable	not applicable
73510_1x_BE4_01_20752.mzXML	11442.G73510	9 soy sauce	complex	food	land	plant	fruit	legume	legume	bean	soybean	not applicable	not applicable	not applicable	processed	not applicable	not applicable	not applicable	not collected	2017-10-02	TRUE	193	urban biome	anthropogenic environmental material	food product	misc environment	none	USA:CA:San Diego	not entered	not entered	32.842	-117.258	food fermentation metagenome	not entered	1154581	Global FoodOmics	not entered	not entered	soy sauce	host-associated	plant	plant-corpus	yes	18	not provided	preservative	sodium benzoate	not applicable	not applicable
73511_1x_BG5_01_20771.mzXML	11442.G73511	hibiscus apricot probiotic kefir water tea	complex	beverage	land	plant	fruit	complex	complex	complex	complex	non-alcoholic	carbonated	kefir	fermented	not applicable	not applicable	not applicable	not collected	2017-10-01 23:30:00	TRUE	193	urban biome	anthropogenic environmental material	food product	misc environment	none	USA:CA:San Diego	not entered	not entered	32.842	-117.258	food fermentation metagenome	not entered	1154581	Global FoodOmics	not entered	not entered	kefir water	host-associated	plant	plant-corpus	yes	18	not provided	no	not applicable	not applicable	not applicable
73514_1x_12ul_rerun_BB5_01_21456.mzXML	11442.G73514	lemon ginger cayenne kombucha	complex	beverage	land	plant	vegetable/herb	vegetable/herb	tea/infusion	kombucha	kombucha	non-alcoholic	carbonated	kombucha	fermented	Camellia	Camellia sp.	leaf	Theaceae	2017-09-02 14:51:00	TRUE	193	urban biome	anthropogenic environmental material	food product	misc environment	none	USA:CA:San Diego	not entered	not entered	32.842	-117.258	food fermentation metagenome	not entered	1154581	Global FoodOmics	not entered	not entered	kombucha	host-associated	plant	plant-corpus	yes	18	not provided	natural	lemon;ginger;cayanne	not applicable	not applicable
73515_1x_rerun_BA5_01_21392.mzXML	11442.G73515	love kombucha	complex	beverage	land	plant	vegetable/herb	vegetable/herb	tea/infusion	kombucha	kombucha	non-alcoholic	carbonated	kombucha	fermented	Camellia	Camellia sp.	leaf	Theaceae	2017-09-02 14:53:00	TRUE	193	urban biome	anthropogenic environmental material	food product	misc environment	none	USA:CA:San Diego	not entered	not entered	32.842	-117.258	food fermentation metagenome	not entered	1154581	Global FoodOmics	not entered	not entered	kombucha	host-associated	plant	plant-corpus	yes	18	not provided	natural	lavendar;chamomile;damiana;rose	not applicable	not applicable
73516_1x_BC5_01_20737.mzXML	11442.G73516	clear mind kombucha	complex	beverage	land	plant	vegetable/herb	vegetable/herb	tea/infusion	kombucha	kombucha	non-alcoholic	carbonated	kombucha	fermented	Camellia	Camellia sp.	leaf	Theaceae	2017-09-02 14:54:00	TRUE	193	urban biome	anthropogenic environmental material	food product	misc environment	none	USA:CA:San Diego	not entered	not entered	32.842	-117.258	food fermentation metagenome	not entered	1154581	Global FoodOmics	not entered	not entered	kombucha	host-associated	plant	plant-corpus	yes	18	not provided	natural	rosemary;peppermint;sage;dandelion root	not applicable	not applicable
73529_1x_BC8_01_20740.mzXML	11442.G73529	Belgian Abbey Yeast	complex	food	land	fungi	fungi	fungi	yeast	yeast	yeast	not applicable	not applicable	not applicable	cultured	not applicable	not applicable	not applicable	not collected	2017-09-03	TRUE	193	urban biome	anthropogenic environmental material	food product	misc environment	none	USA:CA:San Diego	not entered	not entered	32.842	-117.258	food fermentation metagenome	not entered	1154581	Global FoodOmics	not entered	not entered	culture	free-living	non-saline	water (non-saline) (non-saline)	yes	18	not provided	not applicable	not applicable	not applicable	not applicable
73530_1x_BE8_01_20756.mzXML	11442.G73530	European Ale Yeast	complex	food	land	fungi	fungi	fungi	yeast	yeast	yeast	not applicable	not applicable	not applicable	cultured	not applicable	not applicable	not applicable	not collected	2017-09-03	TRUE	193	urban biome	anthropogenic environmental material	food product	misc environment	none	USA:CA:San Diego	not entered	not entered	32.842	-117.258	food fermentation metagenome	not entered	1154581	Global FoodOmics	not entered	not entered	culture	free-living	non-saline	water (non-saline) (non-saline)	yes	18	not provided	not applicable	not applicable	not applicable	not applicable
73714_1x_BA9_01_17392.mzXML	11442.G73714	grapes	simple	food	land	plant	fruit	fleshy fruit	berry	grape	green grape	not applicable	not applicable	not applicable	not applicable	Vitis	Vitis sp.	fruit	Vitaceae	2017-08-02 20:00:00	TRUE	193	urban biome	anthropogenic environmental material	food product	misc environment	none	USA:CA:San Diego	not entered	not entered	32.842	-117.258	food metagenome	not entered	870726	Global FoodOmics	not entered	not entered	grape	host-associated	plant	plant-corpus	no	12	not provided	no	not applicable	not applicable	not applicable
73730_1x_BB9_01_17405.mzXML	11442.G73730	mango	simple	food	land	plant	fruit	fleshy fruit	drupe	mango	mango	not applicable	not applicable	not applicable	not applicable	mangifera	mangifera sp.	fruit	Anacardiaceae	2017-08-08 08:00:00	TRUE	193	urban biome	anthropogenic environmental material	food product	misc environment	none	USA:CA:San Diego	not entered	not entered	32.842	-117.258	food metagenome	not entered	870726	Global FoodOmics	not entered	not entered	stone fruit	host-associated	plant	plant-corpus	no	12	not provided	no	not applicable	not applicable	not applicable
73959_1x_BD4_01_17431.mzXML	11442.G73959	hashbrown from burrito	complex	food	land	plant	complex	complex	complex	complex	complex	not applicable	not applicable	not applicable	cooked	Solanum	Solanum sp.	tuber	Solanaceae	2017-06-22 07:45:00	TRUE	1619	urban biome	anthropogenic environmental material	food product	misc environment	none	USA:NM:Albuquerque	not entered	not entered	35.0853	106.606	food metagenome	not entered	870726	Global FoodOmics	not entered	not entered	burrito	host-associated	plant	plant-corpus	no	12	not provided	no	not applicable	not applicable	not applicable
73960_1x_BE4_01_17444.mzXML	11442.G73960	larger green chili sample from burrito	complex	food	land	plant	fruit	fleshy fruit	berry	pepper	green chili pepper	not applicable	not applicable	not applicable	cooked	Capsicum	Capsicum sp.	fruit	Solanaceae	2017-06-22 07:45:00	TRUE	1619	urban biome	anthropogenic environmental material	food product	misc environment	orange/yellow	USA:NM:Albuquerque	not entered	not entered	35.0853	106.606	food metagenome	not entered	870726	Global FoodOmics	not entered	not entered	burrito	host-associated	plant	plant-corpus	no	12	not provided	no	not applicable	not applicable	not applicable
73971_1x_BF4_01_17478.mzXML	11442.G73971	lettuce; Frontier burrito plate	complex	food	land	plant	vegetable/herb	vegetable/herb	vegetable	lettuce	iceberg lettuce	not applicable	not applicable	not applicable	not applicable	Lactuca	Lactuca sp.	leaf	Asteraceae	2017-06-20	TRUE	1619	urban biome	anthropogenic environmental material	food product	misc environment	none	USA:NM:Albuquerque	not entered	not entered	35.0853	106.606	food metagenome	not entered	870726	Global FoodOmics	not entered	not entered	lettuce	host-associated	plant	plant-corpus	no	12	not provided	no	not applicable	not applicable	not applicable
73974_1x_BC4_01_17413.mzXML	11442.G73974	refried beans; Monroe's chilli rellenoplatter	complex	food	land	plant	fruit	legume	legume	bean	bean	not applicable	not applicable	not applicable	processed	phaseolus	phaseolus sp.	seed	Fabaceae	2017-06-20	TRUE	1619	urban biome	anthropogenic environmental material	food product	misc environment	none	USA:NM:Albuquerque	not entered	not entered	35.0853	106.606	food metagenome	not entered	870726	Global FoodOmics	not entered	not entered	beans	host-associated	plant	plant-corpus	no	12	not provided	no	not applicable	not applicable	not applicable
73976_1x_BB4_01_17400.mzXML	11442.G73976	tomato; Monroe's chili relleno	complex	food	land	plant	fruit	fleshy fruit	berry	tomato	tomato	not applicable	not applicable	not applicable	not applicable	Solanum	Solanum sp.	fruit	Solanaceae	2017-06-20	TRUE	1619	urban biome	anthropogenic environmental material	food product	misc environment	none	USA:NM:Albuquerque	not entered	not entered	35.0853	106.606	food metagenome	not entered	870726	Global FoodOmics	not entered	not entered	tomato	host-associated	plant	plant-corpus	no	12	not provided	no	not applicable	not applicable	not applicable
73978_1x_BA4_01_17387.mzXML	11442.G73978	green chili; Monroe's chili rellenoplatter	complex	food	land	plant	fruit	fleshy fruit	berry	pepper	green chili pepper	not applicable	not applicable	not applicable	processed	Capsicum	Capsicum sp.	fruit	Solanaceae	2017-06-20	TRUE	1619	urban biome	anthropogenic environmental material	food product	misc environment	none	USA:NM:Albuquerque	not entered	not entered	35.0853	106.606	food metagenome	not entered	870726	Global FoodOmics	not entered	not entered	relleno	host-associated	plant	plant-corpus	no	12	not provided	no	not applicable	not applicable	not applicable
73980_1x_BB10_01_17406.mzXML	11442.G73980	fig	simple	food	land	plant	fruit	fleshy fruit	multifruit	fig	fig	not applicable	not applicable	not applicable	not applicable	Ficus	Ficus sp.	fruit	Moraceae	2017-06-20	TRUE	193	urban biome	anthropogenic environmental material	food product	misc environment	none	USA:CA:San Diego	not entered	not entered	32.842	-117.258	food metagenome	not entered	870726	Global FoodOmics	not entered	not entered	fig	host-associated	plant	plant-corpus	no	12	not provided	no	not applicable	not applicable	not applicable
73981_1x_BA10_01_17393.mzXML	11442.G73981	rosemary	simple	food	land	plant	vegetable/herb	vegetable/herb	herb/spice	rosemary	rosemary	not applicable	not applicable	not applicable	not applicable	rosmarinus	rosmarinus sp.	leaf	Lamiaceae	2017-06-20	TRUE	1619	urban biome	anthropogenic environmental material	food product	misc environment	none	USA:NM:Albuquerque	not entered	not entered	35.0853	106.606	food metagenome	not entered	870726	Global FoodOmics	not entered	not entered	herb	host-associated	plant	plant-corpus	no	12	not provided	no	not applicable	not applicable	not applicable
73982_1x_BG7_01_17488.mzXML	11442.G73982	lavendar	simple	food	land	plant	vegetable/herb	vegetable/herb	flower	lavender	lavender	not applicable	not applicable	not applicable	not applicable	lavendula	lavendula sp.	flower	Lamiaceae	2017-06-20	TRUE	1619	urban biome	anthropogenic environmental material	food product	misc environment	none	USA:NM:Albuquerque	not entered	not entered	35.0853	106.606	food metagenome	not entered	870726	Global FoodOmics	not entered	not entered	flower	host-associated	plant	plant-corpus	no	12	not provided	no	not applicable	not applicable	not applicable
73989_5x_RH6_01_17500.mzXML	11442.G73989	blueberry	simple	food	land	plant	fruit	fleshy fruit	berry	blueberry	blueberry	not applicable	not applicable	not applicable	not applicable	vaccinium	vaccinium sp.	fruit	Ericaceae	2017-05-26 22:33:00	TRUE	178	urban biome	anthropogenic environmental material	food product	misc environment	purple	GER:aachen	not entered	not entered	50.7753	6.0839	food metagenome	not entered	870726	Global FoodOmics	not entered	not entered	berry	host-associated	plant	plant-corpus	no	12	not provided	no	not applicable	not applicable	not applicable
73990_1x_BH7_01_17517.mzXML	11442.G73990	cherry tomato, half of top part	simple	food	land	plant	fruit	fleshy fruit	berry	tomato	cherry tomato	not applicable	not applicable	not applicable	not applicable	Solanum	Solanum sp.	fruit	Solanaceae	2017-05-26 22:33:00	TRUE	178	urban biome	anthropogenic environmental material	food product	misc environment	bright orange	GER:aachen	not entered	not entered	50.7753	6.0839	food metagenome	not entered	870726	Global FoodOmics	not entered	not entered	tomato	host-associated	plant	plant-corpus	no	12	not provided	no	not applicable	not applicable	not applicable
73992_1x_BB7_01_17403.mzXML	11442.G73992	onion, fried with butter and chantrelle mushrooms	complex	food	land	complex	complex	complex	complex	complex	complex	not applicable	not applicable	not applicable	sauteed	Allium	Allium sp.	stem	Amaryllidaceae	2017-06-07 09:20:00	TRUE	118	urban biome	anthropogenic environmental material	food product	misc environment	none	GER: Karlsruhe	not entered	not entered	49.0069	8.4037	food metagenome	not entered	870726	Global FoodOmics	not entered	not entered	onion	host-associated	not applicable	not applicable	no	12	not provided	no	not applicable	not applicable	not applicable
73996_1x_BG8_01_17489.mzXML	11442.G73996	kohlrabi	simple	food	land	plant	vegetable/herb	vegetable/herb	vegetable	kohlrabi	kohlrabi	not applicable	not applicable	not applicable	not applicable	Brassica	Brassica sp.	stem	Brassicaceae	2017-06-07 13:00:00	TRUE	118	urban biome	anthropogenic environmental material	food product	misc environment	none	GER: Karlsruhe	not entered	not entered	49.0069	8.4037	food metagenome	not entered	870726	Global FoodOmics	not entered	not entered	kohlrabi	host-associated	plant	plant-corpus	no	12	not provided	no	not applicable	not applicable	not applicable
73997_1x_BB2_01_17398.mzXML	11442.G73997	chantrelle mushroom	complex	food	land	fungi	fungi	fungi	mushroom	mushroom	chantrelle mushroom	not applicable	not applicable	not applicable	sauteed	Cantharellus	Cantharellus sp.	fruiting body	Cantharellus	2017-06-07 09:20:00	TRUE	118	urban biome	anthropogenic environmental material	food product	misc environment	none	GER: Karlsruhe	not entered	not entered	49.0069	8.4037	food metagenome	not entered	870726	Global FoodOmics	not entered	not entered	mushroom	host-associated	fungus	fungus-corpus	no	12	not provided	no	not applicable	not applicable	not applicable
74003_1x_BA2_01_17385.mzXML	11442.G74003	strawberry, self picked from field, washed and refrigerated	simple	food	land	plant	fruit	fleshy fruit	pseudocarp	strawberry	strawberry	not applicable	not applicable	not applicable	not applicable	Fragaria	Fragaria sp.	fruit	Rosaceae	2017-06-07 22:00:00	TRUE	118	urban biome	anthropogenic environmental material	food product	misc environment	pink	GER: Karlsruhe	not entered	not entered	49.0069	8.4037	food metagenome	not entered	870726	Global FoodOmics	not entered	not entered	berry	host-associated	plant	plant-corpus	no	12	not provided	no	not applicable	not applicable	not applicable
74004_1x_BD2_01_17474.mzXML	11442.G74004	onion	simple	food	land	plant	vegetable/herb	vegetable/herb	vegetable	onion	white onion	not applicable	not applicable	not applicable	not applicable	Allium	Allium sp.	bulb	Amaryllidaceae	2017-06-07 22:00:00	TRUE	118	urban biome	anthropogenic environmental material	food product	misc environment	none	GER: Karlsruhe	not entered	not entered	49.0069	8.4037	food metagenome	not entered	870726	Global FoodOmics	not entered	not entered	onion	host-associated	plant	plant-corpus	no	12	not provided	no	not applicable	not applicable	not applicable
74009_5x_RC2_01_17411.mzXML	11442.G74009	strawberry, self picked from field, same day, not washed	simple	food	land	plant	fruit	fleshy fruit	pseudocarp	strawberry	strawberry	not applicable	not applicable	not applicable	not applicable	Fragaria	Fragaria sp.	fruit	Rosaceae	2017-06-06	TRUE	118	urban biome	anthropogenic environmental material	food product	misc environment	pink	GER: Karlsruhe	not entered	not entered	49.0069	8.4037	food metagenome	not entered	870726	Global FoodOmics	not entered	not entered	berry	host-associated	plant	plant-corpus	no	12	not provided	no	not applicable	not applicable	not applicable
74011_1x_BF2_01_17455.mzXML	11442.G74011	white asparagus	simple	food	land	plant	vegetable/herb	vegetable/herb	vegetable	asparagus	white asparagus	not applicable	not applicable	not applicable	boiled	asparagus	Asparagus sp.	flower/stem	Asparagaceae	2017-06-06	TRUE	118	urban biome	anthropogenic environmental material	food product	misc environment	none	GER: Karlsruhe	not entered	not entered	49.0069	8.4037	food metagenome	not entered	870726	Global FoodOmics	not entered	not entered	asparagus	host-associated	plant	plant-corpus	no	12	not provided	no	not applicable	not applicable	not applicable
74012_1x_BE2_01_17442.mzXML	11442.G74012	apple from apple danish	complex	food	land	plant	fruit	fleshy fruit	pome	apple	apple	not applicable	not applicable	not applicable	baked	Malus	Malus sp.	fruit	Rosaceae	2017-06-07 22:00:00	TRUE	118	urban biome	anthropogenic environmental material	food product	misc environment	none	GER: Karlsruhe	not entered	not entered	49.0069	8.4037	food metagenome	not entered	870726	Global FoodOmics	not entered	not entered	fruit filling	host-associated	plant	plant-corpus	no	12	not provided	not collected	not collected	not applicable	not applicable
74014_5x_RH2_01_17496.mzXML	11442.G74014	cherry from cherry danish	complex	food	land	plant	fruit	fleshy fruit	drupe	cherry	cherry	not applicable	not applicable	not applicable	baked	Prunus	Prunus sp.	fruit	Rosaceae	2017-06-07 22:00:00	TRUE	118	urban biome	anthropogenic environmental material	food product	misc environment	pink	GER: Karlsruhe	not entered	not entered	49.0069	8.4037	food metagenome	not entered	870726	Global FoodOmics	not entered	not entered	fruit filling	host-associated	plant	plant-corpus	no	12	not provided	not collected	not collected	not applicable	not applicable
74015_1x_BG2_01_17470.mzXML	11442.G74015	bell pepper, orange	simple	food	land	plant	fruit	fleshy fruit	berry	pepper	orange bell pepper	not applicable	not applicable	not applicable	not applicable	Capsicum	Capsicum sp.	fruit	Solanaceae	2017-06-07 22:00:00	TRUE	118	urban biome	anthropogenic environmental material	food product	misc environment	orange	GER: Karlsruhe	not entered	not entered	49.0069	8.4037	food metagenome	not entered	870726	Global FoodOmics	not entered	not entered	pepper	host-associated	plant	plant-corpus	no	12	not provided	no	not applicable	not applicable	not applicable
74018_1x_BB12_01_17408.mzXML	11442.G74018	bell pepper, red	simple	food	land	plant	fruit	fleshy fruit	berry	pepper	red bell pepper	not applicable	not applicable	not applicable	not applicable	Capsicum	Capsicum sp.	fruit	Solanaceae	2017-06-07 22:00:00	TRUE	118	urban biome	anthropogenic environmental material	food product	misc environment	dark orange	GER: Karlsruhe	not entered	not entered	49.0069	8.4037	food metagenome	not entered	870726	Global FoodOmics	not entered	not entered	pepper	host-associated	plant	plant-corpus	no	12	not provided	no	not applicable	not applicable	not applicable
74021_1x_BA12_01_17395.mzXML	11442.G74021	cucumber	simple	food	land	plant	fruit	fleshy fruit	pepo	cucumber	cucumber	not applicable	not applicable	not applicable	not applicable	Cucumis	Cucumis sp.	fruit	Cucurbitaceae	2017-05-30 08:53:00	TRUE	158	urban biome	anthropogenic environmental material	food product	misc environment	green	Belgium	not entered	not entered	50.5039	4.4699	food metagenome	not entered	870726	Global FoodOmics	not entered	not entered	cucumber	host-associated	plant	plant-corpus	no	12	not provided	no	not applicable	not applicable	not applicable
74025_1x_BC6_01_17415.mzXML	11442.G74025	mushroom, cooked	complex	food	land	fungi	fungi	fungi	mushroom	mushroom	mushroom	not applicable	not applicable	not applicable	cooked	Agaricus	Agaricus sp.	fruiting body	Agaricaceae	2017-05-30 08:53:00	TRUE	158	urban biome	anthropogenic environmental material	food product	misc environment	lt. brown	Belgium	not entered	not entered	50.5039	4.4699	food metagenome	not entered	870726	Global FoodOmics	not entered	not entered	mushroom	host-associated	fungus	fungus-corpus	no	12	not provided	not collected	not applicable	not applicable	not applicable
74027_1x_BC12_01_17421.mzXML	11442.G74027	strawberry	simple	food	land	plant	fruit	fleshy fruit	pseudocarp	strawberry	strawberry	not applicable	not applicable	not applicable	not applicable	Fragaria	Fragaria sp.	fruit	Rosaceae	2017-05-31 18:55:00	TRUE	178	urban biome	anthropogenic environmental material	food product	misc environment	pink	GER:aachen	not entered	not entered	50.7753	6.0839	food metagenome	not entered	870726	Global FoodOmics	not entered	not entered	berry	host-associated	plant	plant-corpus	no	12	not provided	no	not applicable	not applicable	not applicable
74028_1x_BE11_01_17451.mzXML	11442.G74028	strawberry	simple	food	land	plant	fruit	fleshy fruit	pseudocarp	strawberry	strawberry	not applicable	not applicable	not applicable	not applicable	Fragaria	Fragaria sp.	fruit	Rosaceae	2017-06-01 18:55:00	TRUE	178	urban biome	anthropogenic environmental material	food product	misc environment	pink	GER:aachen	not entered	not entered	50.7753	6.0839	food metagenome	not entered	870726	Global FoodOmics	not entered	not entered	berry	host-associated	plant	plant-corpus	no	12	not provided	no	not applicable	not applicable	not applicable
74031_1x_BF11_01_17483.mzXML	11442.G74031	butter leaf lettuce, mixed in salad	complex	food	land	plant	vegetable/herb	vegetable/herb	vegetable	lettuce	butter leaf lettuce	not applicable	not applicable	not applicable	not applicable	Lactuca	Lactuca sp.	leaf	Asteraceae	2017-06-07 22:00:00	TRUE	118	urban biome	anthropogenic environmental material	food product	misc environment	bright green	GER: Karlsruhe	not entered	not entered	49.0069	8.4037	food metagenome	not entered	870726	Global FoodOmics	not entered	not entered	lettuce	host-associated	plant	plant-corpus	no	12	not provided	no	not applicable	not applicable	not applicable
74057_1x_BE2_01_20750.mzXML	11442.G74057	beet kvass	complex	beverage	land	plant	vegetable/herb	vegetable/herb	vegetable	beet	beet	non-alcoholic	carbonated	kvass	fermented	Beta	Beta vulgaris	root	Chenopodiaceae	2017-08-29 10:30:00	TRUE	193	urban biome	anthropogenic environmental material	food product	misc environment	magenta	USA:CA:San Diego	not entered	not entered	32.842	-117.258	food fermentation metagenome	not entered	1154581	Global FoodOmics	not entered	not entered	fermented juice	host-associated	plant	plant-corpus	yes	18	not provided	no	not applicable	not applicable	not applicable
74058_1x_BF2_01_21383.mzXML	11442.G74058	california kimchi brine	complex	food	land	plant	complex	complex	complex	complex	complex	non-alcoholic	non-carbonated	brine	processed	not applicable	not applicable	not applicable	not collected	2017-06-23	TRUE	193	urban biome	anthropogenic environmental material	food product	misc environment	none	USA:CA:San Diego	not entered	not entered	32.842	-117.258	food fermentation metagenome	not entered	1154581	Global FoodOmics	not entered	not entered	brine	host-associated	plant	plant-corpus	yes	18	not provided	no	not applicable	not applicable	not applicable
74059_1x_BG2_01_20767.mzXML	11442.G74059	silly dilly kraut brine	complex	food	land	plant	complex	complex	complex	complex	complex	non-alcoholic	non-carbonated	brine	processed	not applicable	not applicable	not applicable	not collected	2017-06-23	TRUE	193	urban biome	anthropogenic environmental material	food product	misc environment	none	USA:CA:San Diego	not entered	not entered	32.842	-117.258	food fermentation metagenome	not entered	1154581	Global FoodOmics	not entered	not entered	brine	host-associated	plant	plant-corpus	yes	18	not provided	no	not applicable	not applicable	not applicable
74060_1x_BH7_01_20781.mzXML	11442.G74060	Maeil dairy drink	complex	beverage	land	animal	animal	dairy	complex	complex	complex	not applicable	not applicable	not applicable	fermented	not applicable	not applicable	not applicable	not collected	2017-09-03	TRUE	193	urban biome	anthropogenic environmental material	food product	misc environment	none	USA:CA:San Diego	not entered	not entered	32.842	-117.258	food fermentation metagenome	not entered	1154581	Global FoodOmics	not entered	not entered	fermented beverage	host-associated	animal	animal-secretion	yes	18	not provided	natural	yogurt flavor	not applicable	not applicable
74061_1x_BF7_01_20764.mzXML	11442.G74061	Unoaked sake	complex	beverage	land	plant	fruit	grain/grass	grain/grass	rice	rice	alcoholic	non-carbonated	sake	fermented	not applicable	not applicable	not applicable	not collected	2017-09-04	TRUE	193	urban biome	anthropogenic environmental material	food product	misc environment	none	USA:CA:San Diego	not entered	not entered	32.842	-117.258	food fermentation metagenome	not entered	1154581	Global FoodOmics	not entered	not entered	fermented beverage	host-associated	plant	plant-corpus	yes	18	not provided	no	not applicable	not applicable	not applicable
74062_1x_BE7_01_20755.mzXML	11442.G74062	Oaked sake	complex	beverage	land	plant	fruit	grain/grass	grain/grass	rice	rice	alcoholic	non-carbonated	sake	fermented	not applicable	not applicable	not applicable	not collected	2017-09-05	TRUE	193	urban biome	anthropogenic environmental material	food product	misc environment	none	USA:CA:San Diego	not entered	not entered	32.842	-117.258	food fermentation metagenome	not entered	1154581	Global FoodOmics	not entered	not entered	fermented beverage	host-associated	plant	plant-corpus	yes	18	not provided	no	not applicable	not applicable	not applicable
74089_1x_rerun_BB7_01_21459.mzXML	11442.G74089	AA Kenyan coffee, pour-over	complex	beverage	land	plant	fruit	fleshy fruit	berry	coffee	coffee	non-alcoholic	non-carbonated	coffee	steeped	Coffea	Coffea sp.	fruit	Rubiaceae	2017-09-06	TRUE	193	urban biome	anthropogenic environmental material	food product	misc environment	none	USA:CA:San Diego	not entered	not entered	32.842	-117.258	food fermentation metagenome	not entered	1154581	Global FoodOmics	not entered	not entered	coffee	host-associated	plant	plant-corpus	yes	18	not provided	not applicable	not applicable	not applicable	not applicable
74090_1x_rerun_BA7_01_21395.mzXML	11442.G74090	Copper Moon Kenyan coffee, pour-over	complex	beverage	land	plant	fruit	fleshy fruit	berry	coffee	coffee	non-alcoholic	non-carbonated	coffee	steeped	Coffea	Coffea sp.	fruit	Rubiaceae	2017-09-06	TRUE	193	urban biome	anthropogenic environmental material	food product	misc environment	none	USA:CA:San Diego	not entered	not entered	32.842	-117.258	food fermentation metagenome	not entered	1154581	Global FoodOmics	not entered	not entered	coffee	host-associated	plant	plant-corpus	yes	18	not provided	not applicable	not applicable	not applicable	not applicable
74091_1x_BG7_01_20773.mzXML	11442.G74091	Brazilian coffee, pour-over	complex	beverage	land	plant	fruit	fleshy fruit	berry	coffee	coffee	non-alcoholic	non-carbonated	coffee	steeped	Coffea	Coffea sp.	fruit	Rubiaceae	2017-09-06	TRUE	193	urban biome	anthropogenic environmental material	food product	misc environment	none	USA:CA:San Diego	not entered	not entered	32.842	-117.258	food fermentation metagenome	not entered	1154581	Global FoodOmics	not entered	not entered	coffee	host-associated	plant	plant-corpus	yes	18	not provided	not applicable	not applicable	not applicable	not applicable
74092_1x_12ul_rerun_BB2_01_21453.mzXML	11442.G74092	Passion fruit kombucha	complex	beverage	land	plant	vegetable/herb	vegetable/herb	tea/infusion	kombucha	kombucha	non-alcoholic	carbonated	kombucha	fermented	Camellia	Camellia sp.	leaf	Theaceae	2017-09-06 10:07:00	TRUE	193	urban biome	anthropogenic environmental material	food product	misc environment	none	USA:CA:San Diego	not entered	not entered	32.842	-117.258	food fermentation metagenome	not entered	1154581	Global FoodOmics	not entered	not entered	kombucha	host-associated	plant	plant-corpus	yes	18	not provided	no	not applicable	not applicable	not applicable
74093_1x_BC2_01_20734.mzXML	11442.G74093	apple kombucha (?)	complex	beverage	land	plant	vegetable/herb	vegetable/herb	tea/infusion	kombucha	kombucha	non-alcoholic	carbonated	kombucha	fermented	Camellia	Camellia sp.	leaf	Theaceae	2017-09-06 15:06:00	TRUE	193	urban biome	anthropogenic environmental material	food product	misc environment	none	USA:CA:San Diego	not entered	not entered	32.842	-117.258	food fermentation metagenome	not entered	1154581	Global FoodOmics	not entered	not entered	kombucha	host-associated	plant	plant-corpus	yes	18	not provided	no	not applicable	not applicable	not applicable
74119_1x_12ul_rerun_BB3_01_21454.mzXML	11442.G74119	green tea with sugar	complex	beverage	land	plant	vegetable/herb	vegetable/herb	tea/infusion	tea	tea	non-alcoholic	non-carbonated	tea	brewed	Camellia	Camellia sp.	leaf	Theaceae	2017-08-11 07:45:00	TRUE	193	urban biome	anthropogenic environmental material	food product	misc environment	none	USA:CA:San Diego	not entered	not entered	32.842	-117.258	food fermentation metagenome	not entered	1154581	Global FoodOmics	not entered	not entered	tea for kombucha	host-associated	plant	plant-corpus	yes	18	not provided	no	not applicable	not applicable	not applicable
74125_1x_12ul_rerun_BA2_01_21387.mzXML	11442.G74125	fig kombucha	complex	beverage	land	plant	vegetable/herb	vegetable/herb	tea/infusion	kombucha	kombucha	non-alcoholic	carbonated	kombucha	fermented	Camellia	Camellia sp.	leaf	Theaceae	2017-08-17 10:30:00	TRUE	193	urban biome	anthropogenic environmental material	food product	misc environment	none	USA:CA:San Diego	not entered	not entered	32.842	-117.258	food fermentation metagenome	not entered	1154581	Global FoodOmics	not entered	not entered	kombucha	host-associated	plant	plant-corpus	yes	18	not provided	no	not applicable	not applicable	not applicable
75069_5x_RG10_01_17491.mzXML	11442.G75069	cilantro	simple	food	land	plant	vegetable/herb	vegetable/herb	herb/spice	cilantro	cilantro	not applicable	not applicable	not applicable	not applicable	coriandrum	coriandrum sp.	leaf	Apiaceae	2017-08-07 19:30:00	TRUE	193	urban biome	anthropogenic environmental material	food product	misc environment	none	USA:CA:San Diego	not entered	not entered	32.842	-117.258	food metagenome	not entered	870726	Global FoodOmics	not entered	not entered	herb	host-associated	plant	plant-corpus	no	12	not provided	no	not applicable	not applicable	not applicable
75070_1x_BC10_01_17419.mzXML	11442.G75070	sweet corn	simple	food	land	plant	fruit	grain/grass	grain/grass	corn	sweet corn	not applicable	not applicable	not applicable	not applicable	Zea	Zea sp.	fruit	Poaceae	2017-08-07 19:30:00	TRUE	193	urban biome	anthropogenic environmental material	food product	misc environment	none	USA:CA:San Diego	not entered	not entered	32.842	-117.258	food metagenome	not entered	870726	Global FoodOmics	not entered	not entered	grain	host-associated	plant	plant-corpus	no	12	not provided	no	not applicable	not applicable	not applicable
75071_1x_BD10_01_17477.mzXML	11442.G75071	green seedless grapes	simple	food	land	plant	fruit	fleshy fruit	berry	grape	green grape	not applicable	not applicable	not applicable	not applicable	Vitis	Vitis sp.	fruit	Vitaceae	2017-08-07 19:30:00	TRUE	193	urban biome	anthropogenic environmental material	food product	misc environment	none	USA:CA:San Diego	not entered	not entered	32.842	-117.258	food metagenome	not entered	870726	Global FoodOmics	not entered	not entered	grape	host-associated	plant	plant-corpus	no	12	not provided	no	not applicable	not applicable	not applicable
75072_1x_BE9_01_17449.mzXML	11442.G75072	orchard view cherry	simple	food	land	plant	fruit	fleshy fruit	drupe	cherry	cherry	not applicable	not applicable	not applicable	not applicable	Prunus	Prunus sp.	fruit	Rosaceae	2017-08-07 19:30:00	TRUE	193	urban biome	anthropogenic environmental material	food product	misc environment	brown/red	USA:CA:San Diego	not entered	not entered	32.842	-117.258	food metagenome	not entered	870726	Global FoodOmics	not entered	not entered	stone fruit	host-associated	plant	plant-corpus	no	12	not provided	no	not applicable	not applicable	not applicable
75077_5x_RC11_01_17425.mzXML	11442.G75077	blueberry	simple	food	land	plant	fruit	fleshy fruit	berry	blueberry	blueberry	not applicable	not applicable	not applicable	not applicable	vaccinium	vaccinium sp.	fruit	Ericaceae	2017-08-08 07:45:00	TRUE	193	urban biome	anthropogenic environmental material	food product	misc environment	none	USA:CA:San Diego	not entered	not entered	32.842	-117.258	food metagenome	not entered	870726	Global FoodOmics	not entered	not entered	berry	host-associated	plant	plant-corpus	no	12	not provided	no	not applicable	not applicable	not applicable
75083_5x_RE3_01_17443.mzXML	11442.G75083	peas	simple	food	land	plant	fruit	legume	legume	pea	pea	not applicable	not applicable	not applicable	frozen	Pisum	Pisum sp.	seed	Fabaceae	2017-08-08	TRUE	193	urban biome	anthropogenic environmental material	food product	misc environment	none	USA:CA:San Diego	not entered	not entered	32.842	-117.258	food metagenome	not entered	870726	Global FoodOmics	not entered	not entered	legume	host-associated	plant	plant-corpus	no	12	not provided	no	not applicable	not applicable	not applicable
75084_1x_BD3_01_17475.mzXML	11442.G75084	corn	simple	food	land	plant	fruit	grain/grass	grain/grass	corn	corn	not applicable	not applicable	not applicable	frozen	Zea	Zea sp.	fruit	Poaceae	2017-08-08	TRUE	193	urban biome	anthropogenic environmental material	food product	misc environment	none	USA:CA:San Diego	not entered	not entered	32.842	-117.258	food metagenome	not entered	870726	Global FoodOmics	not entered	not entered	grain	host-associated	plant	plant-corpus	no	12	not provided	no	not applicable	not applicable	not applicable
75085_1x_BF3_01_17456.mzXML	11442.G75085	carrot, raw	simple	food	land	plant	vegetable/herb	vegetable/herb	vegetable	carrot	carrot	not applicable	not applicable	not applicable	not applicable	Daucus	Daucus carota	root	Apiaceae	2017-08-08 20:14:00	TRUE	193	urban biome	anthropogenic environmental material	food product	misc environment	none	USA:CA:San Diego	not entered	not entered	32.842	-117.258	food metagenome	not entered	870726	Global FoodOmics	not entered	not entered	carrot	host-associated	plant	plant-corpus	no	12	not provided	no	not applicable	not applicable	not applicable
75086_1x_BH3_01_17497.mzXML	11442.G75086	mushroom, raw	simple	food	land	fungi	fungi	fungi	mushroom	mushroom	white mushroom	not applicable	not applicable	not applicable	not applicable	Agaricus	Agaricus sp.	fruiting body	Agaricaceae	2017-08-08	TRUE	193	urban biome	anthropogenic environmental material	food product	misc environment	none	USA:CA:San Diego	not entered	not entered	32.842	-117.258	food metagenome	not entered	870726	Global FoodOmics	not entered	not entered	mushroom	host-associated	fungus	fungus-corpus	no	12	not provided	no	not applicable	not applicable	not applicable
75089_1x_BF10_01_17482.mzXML	11442.G75089	carrot	simple	food	land	plant	vegetable/herb	vegetable/herb	vegetable	carrot	carrot	not applicable	not applicable	not applicable	not applicable	Daucus	Daucus carota	root	Apiaceae	2017-08-07 19:30:00	TRUE	193	urban biome	anthropogenic environmental material	food product	misc environment	none	USA:CA:San Diego	not entered	not entered	32.842	-117.258	food metagenome	not entered	870726	Global FoodOmics	not entered	not entered	carrot	host-associated	plant	plant-corpus	no	12	not provided	no	not applicable	not applicable	not applicable
75092_1x_BH10_01_17514.mzXML	11442.G75092	cauliflower	simple	food	land	plant	vegetable/herb	vegetable/herb	flower	cauliflower	cauliflower	not applicable	not applicable	not applicable	not applicable	Brassica	Brassica sp.	flower	Brassicaceae	2017-08-07 19:30:00	TRUE	193	urban biome	anthropogenic environmental material	food product	misc environment	none	USA:CA:San Diego	not entered	not entered	32.842	-117.258	food metagenome	not entered	870726	Global FoodOmics	not entered	not entered	cauliflower	host-associated	plant	plant-corpus	no	12	not provided	no	not applicable	not applicable	not applicable
75093_1x_BE10_01_17450.mzXML	11442.G75093	baby arugula	simple	food	land	plant	vegetable/herb	vegetable/herb	vegetable	arugula	arugula	not applicable	not applicable	not applicable	not applicable	eruca	eruca sp.	leaf	Brassicaceae	2017-08-07 19:30:00	TRUE	193	urban biome	anthropogenic environmental material	food product	misc environment	none	USA:CA:San Diego	not entered	not entered	32.842	-117.258	food metagenome	not entered	870726	Global FoodOmics	not entered	not entered	arugula	host-associated	plant	plant-corpus	no	12	not provided	no	not applicable	not applicable	not applicable
75153_1x_BC7_01_17416.mzXML	11442.G75153	mushroom; cooked with other ingredients	complex	food	land	fungi	fungi	fungi	mushroom	mushroom	white mushroom	not applicable	not applicable	not applicable	cooked	Agaricus	Agaricus sp.	fruiting body	Agaricaceae	2017-08-08 20:22:00	TRUE	193	urban biome	anthropogenic environmental material	food product	misc environment	none	USA:CA:San Diego	not entered	not entered	32.842	-117.258	food metagenome	not entered	870726	Global FoodOmics	not entered	not entered	fungi	host-associated	fungus	fungus-corpus	no	12	not provided	no	not applicable	not applicable	not applicable
75154_1x_BF8_01_17481.mzXML	11442.G75154	carrot; cooked with other ingredients	complex	food	land	plant	vegetable/herb	vegetable/herb	vegetable	carrot	carrot	not applicable	not applicable	not applicable	cooked	Daucus	Daucus carota	root	Apiaceae	2017-08-08 20:22:00	TRUE	193	urban biome	anthropogenic environmental material	food product	misc environment	none	USA:CA:San Diego	not entered	not entered	32.842	-117.258	food metagenome	not entered	870726	Global FoodOmics	not entered	not entered	vegetable	host-associated	plant	plant-corpus	no	12	not provided	no	not applicable	not applicable	not applicable
75155_1x_BA7_01_17390.mzXML	11442.G75155	peas; cooked with other ingredients	complex	food	land	plant	vegetable/herb	vegetable/herb	vegetable	pea	pea	not applicable	not applicable	not applicable	cooked	Pisum	Pisum sp.	seed	Fabaceae	2017-08-08 20:22:00	TRUE	193	urban biome	anthropogenic environmental material	food product	misc environment	none	USA:CA:San Diego	not entered	not entered	32.842	-117.258	food metagenome	not entered	870726	Global FoodOmics	not entered	not entered	legume	host-associated	plant	plant-corpus	no	12	not provided	no	not applicable	not applicable	not applicable
75156_1x_BA3_01_17423.mzXML	11442.G75156	pine nut; cooked with other ingredients	complex	food	land	plant	fruit	seed	seed	pine nut	pine nut	not applicable	not applicable	not applicable	cooked	Pinus	Pinus sp.	seed	Pinaceae	2017-08-08 20:22:00	TRUE	193	urban biome	anthropogenic environmental material	food product	misc environment	none	USA:CA:San Diego	not entered	not entered	32.842	-117.258	food metagenome	not entered	870726	Global FoodOmics	not entered	not entered	nut	host-associated	plant	plant-corpus	no	12	not provided	no	not applicable	not applicable	not applicable
75157_1x_BF6_01_17480.mzXML	11442.G75157	sweet corn; cooked with other ingredients	complex	food	land	plant	fruit	grain/grass	grain/grass	corn	corn	not applicable	not applicable	not applicable	cooked	Zea	Zea sp.	fruit	Poaceae	2017-08-08 20:22:00	TRUE	193	urban biome	anthropogenic environmental material	food product	misc environment	none	USA:CA:San Diego	not entered	not entered	32.842	-117.258	food metagenome	not entered	870726	Global FoodOmics	not entered	not entered	corn	host-associated	plant	plant-corpus	no	12	not provided	no	not applicable	not applicable	not applicable
75218_1x_BG8_01_20774.mzXML	11442.G75218	gingerbeer	complex	beverage	land	plant	vegetable/herb	vegetable/herb	complex	complex	complex	non-alcoholic	carbonated	soda	processed	Zingiber	Zingiber officinale	root	Zingiberaceae	2017-06-29	TRUE	193	urban biome	anthropogenic environmental material	food product	misc environment	none	USA:CA:San Diego	not entered	not entered	32.842	-117.258	food metagenome	not entered	870726	Global FoodOmics	not entered	not entered	cold beverage	host-associated	plant	plant-corpus	no	18	not provided	preservative	sodium benzoate;potassium sorbate	not applicable	not applicable
75219_1x_20ul_BD8_01_21381.mzXML	11442.G75219	Whiskey	complex	beverage	land	plant	fruit	grain/grass	complex	complex	complex	alcoholic	non-carbonated	spirit	fermented	not applicable	not applicable	not applicable	not collected	2017-06-29	TRUE	193	urban biome	anthropogenic environmental material	food product	misc environment	none	USA:CA:San Diego	not entered	not entered	32.842	-117.258	food fermentation metagenome	not entered	1154581	Global FoodOmics	not entered	not entered	whiskey	host-associated	plant	plant-corpus	yes	18	not provided	no	not applicable	not applicable	not applicable
75220_1x_BF8_01_20765.mzXML	11442.G75220	Humm brand kombucha pomegranate lemonade flavor	complex	beverage	land	plant	vegetable/herb	vegetable/herb	tea/infusion	kombucha	kombucha	non-alcoholic	carbonated	kombucha	fermented	Camellia	Camellia sp.	leaf	Theaceae	2017-06-29 20:35:00	TRUE	193	urban biome	anthropogenic environmental material	food product	misc environment	none	USA:CA:San Diego	not entered	not entered	32.842	-117.258	food fermentation metagenome	not entered	1154581	Global FoodOmics	not entered	not entered	kombucha	host-associated	plant	plant-corpus	yes	18	not provided	no	not applicable	not applicable	not applicable
75221_1x_BC6_01_20738.mzXML	11442.G75221	margarita mix with tequila (12% alc/vol)	complex	beverage	land	plant	complex	complex	complex	complex	complex	alcoholic	non-carbonated	margharita	fermented	not applicable	not applicable	not applicable	not collected	2017-06-29	TRUE	193	urban biome	anthropogenic environmental material	food product	misc environment	none	USA:CA:San Diego	not entered	not entered	32.842	-117.258	food fermentation metagenome	not entered	1154581	Global FoodOmics	not entered	not entered	beverage	host-associated	plant	plant-corpus	yes	18	not provided	no	not applicable	not applicable	not applicable
75222_1x_15ul_rerun_BA9_01_21450.mzXML	11442.G75222	rose wine	simple	beverage	land	plant	fruit	fleshy fruit	berry	grape_fermented	rose wine	alcoholic	non-carbonated	wine	fermented	not collected	not collected	not collected	not collected	2017-06-29 20:41:00	TRUE	193	urban biome	anthropogenic environmental material	food product	misc environment	none	USA:CA:San Diego	not entered	not entered	32.842	-117.258	food fermentation metagenome	not entered	1154581	Global FoodOmics	not entered	not entered	rose wine	host-associated	plant	plant-corpus	yes	18	not provided	no	not applicable	not applicable	not applicable
75226_1x_BF5_01_20762.mzXML	11442.G75226	probiotic super smoothie	complex	beverage	land	plant	complex	complex	complex	complex	complex	non-alcoholic	non-carbonated	smoothie	pureed	not applicable	not applicable	not applicable	not collected	2017-00-0 00:00	TRUE	193	urban biome	anthropogenic environmental material	food product	misc environment	none	USA:CA:San Diego	not entered	not entered	32.842	-117.258	food fermentation metagenome	not entered	1154581	Global FoodOmics	not entered	not entered	probiotic drink	host-associated	plant	plant-corpus	no	18	not provided	not collected	not provided	not applicable	not applicable
75231_1x_14ul_rerun_BA8_01_21449.mzXML	11442.G75231	nm peach kombucha	complex	beverage	land	plant	vegetable/herb	vegetable/herb	tea/infusion	kombucha	kombucha	non-alcoholic	carbonated	kombucha	fermented	Camellia	Camellia sp.	leaf	Theaceae	2017-09-10 21:00:00	TRUE	193	urban biome	anthropogenic environmental material	food product	misc environment	none	USA:CA:San Diego	not entered	not entered	32.842	-117.258	food fermentation metagenome	not entered	1154581	Global FoodOmics	not entered	not entered	kombucha	host-associated	plant	plant-corpus	yes	18	not provided	no	not applicable	not applicable	not applicable
75235_1x_BF4_01_20761.mzXML	11442.G75235	mocha nut latte	complex	beverage	land	plant	fruit	fleshy fruit	berry	complex	complex	non-alcoholic	non-carbonated	coffee	processed	not applicable	not applicable	not applicable	not collected	2017-10-02 00:23:00	TRUE	193	urban biome	anthropogenic environmental material	food product	misc environment	none	USA:CA:San Diego	not entered	not entered	32.842	-117.258	food fermentation metagenome	not entered	1154581	Global FoodOmics	not entered	not entered	non-dairy latte	host-associated	plant	plant-corpus	yes	18	not provided	no	not applicable	not applicable	not applicable
75236_1x_BD4_01_20744.mzXML	11442.G75236	10 Anchovy fish sauce	complex	food	aquatic	animal	animal	seafood	fish_saltwater	anchovy	anchovy extract	not applicable	not applicable	not applicable	fermented	not applicable	not applicable	not applicable	not collected	2017-10-02	TRUE	193	urban biome	anthropogenic environmental material	food product	misc environment	none	USA:CA:San Diego	not entered	not entered	32.842	-117.258	food fermentation metagenome	not entered	1154581	Global FoodOmics	not entered	not entered	fish sauce	host-associated	animal	animal-corpus	yes	18	not provided	no	not applicable	not applicable	not applicable
75238_1x_BH4_01_20778.mzXML	11442.G75238	bai sparkling antioxidant infusion - peru pineapple	complex	beverage	land	mineral	mineral	mineral	mineral	carbonated	sparkling water	non-alcoholic	carbonated	water	processed	not applicable	not applicable	not applicable	not collected	2017-10-02 00:28:00	TRUE	193	urban biome	anthropogenic environmental material	food product	misc environment	none	USA:CA:San Diego	not entered	not entered	32.842	-117.258	food fermentation metagenome	not entered	1154581	Global FoodOmics	not entered	not entered	antioxidant drink	host-associated	plant	plant-corpus	yes	18	not provided	no	not applicable	not applicable	not applicable
75259_1x_BC7_01_20739.mzXML	11442.G75259	Jarritos fruit punch flavor	complex	beverage	land	plant	complex	complex	complex	complex	complex	non-alcoholic	carbonated	soda	processed	not applicable	not applicable	not applicable	not collected	2017-07-07 17:00:00	TRUE	193	urban biome	anthropogenic environmental material	food product	misc environment	none	USA:CA:San Diego	not entered	not entered	32.842	-117.258	food metagenome	not entered	870726	Global FoodOmics	not entered	not entered	soda	host-associated	plant	plant-corpus	no	18	not provided	preservative	sodium benzoate	not applicable	not applicable
75260_1x_BD7_01_20747.mzXML	11442.G75260	Jarritos Mango Flavor	complex	beverage	land	plant	complex	complex	complex	complex	complex	non-alcoholic	carbonated	soda	processed	not applicable	not applicable	not applicable	not collected	2017-07-07 17:00:00	TRUE	193	urban biome	anthropogenic environmental material	food product	misc environment	none	USA:CA:San Diego	not entered	not entered	32.842	-117.258	food metagenome	not entered	870726	Global FoodOmics	not entered	not entered	soda	host-associated	plant	plant-corpus	no	18	not provided	preservative;natural flavor;artificial color	sodium benzoate	not applicable	not applicable
75261_1x_rerun_BB6_01_21458.mzXML	11442.G75261	H.L.V. ale	complex	beverage	land	plant	fruit	complex	complex	complex	complex	alcoholic	carbonated	ale	fermented	not collected	not collected	not collected	not collected	2017-07-07 17:00:00	TRUE	193	urban biome	anthropogenic environmental material	food product	misc environment	none	USA:CA:San Diego	not entered	not entered	32.842	-117.258	food fermentation metagenome	not entered	1154581	Global FoodOmics	not entered	not entered	beer	host-associated	plant	plant-corpus	yes	18	not provided	no	not applicable	not applicable	not applicable
75262_1x_rerun_BA6_01_21393.mzXML	11442.G75262	Pilsner beer	simple	beverage	land	plant	fruit	grain/grass	grain/grass	grain_fermented	complex	alcoholic	carbonated	beer	fermented	not collected	not collected	not collected	not collected	2017-07-07 17:00:00	TRUE	193	urban biome	anthropogenic environmental material	food product	misc environment	none	USA:CA:San Diego	not entered	not entered	32.842	-117.258	food fermentation metagenome	not entered	1154581	Global FoodOmics	not entered	not entered	beer	host-associated	plant	plant-corpus	yes	18	not provided	no	not applicable	not applicable	not applicable
75263_1x_BD6_01_20746.mzXML	11442.G75263	Newtons Folly cider	simple	beverage	land	plant	fruit	fleshy fruit	pome	apple_cider	apple_cider	alcoholic	carbonated	cider	fermented	Malus	Malus sp.	fruit	Rosaceae	2017-07-07 17:00:00	TRUE	193	urban biome	anthropogenic environmental material	food product	misc environment	none	USA:CA:San Diego	not entered	not entered	32.842	-117.258	food fermentation metagenome	not entered	1154581	Global FoodOmics	not entered	not entered	cider	host-associated	plant	plant-corpus	yes	18	not provided	no	not applicable	not applicable	not applicable
75264_1x_BE6_01_20754.mzXML	11442.G75264	IPA	simple	beverage	land	plant	fruit	grain/grass	grain/grass	grain_fermented	complex	alcoholic	carbonated	IPA	fermented	not collected	not collected	not collected	not collected	2017-07-07 17:00:00	TRUE	193	urban biome	anthropogenic environmental material	food product	misc environment	none	USA:CA:San Diego	not entered	not entered	32.842	-117.258	food fermentation metagenome	not entered	1154581	Global FoodOmics	not entered	not entered	beer	host-associated	plant	plant-corpus	yes	18	not provided	no	not applicable	not applicable	not applicable
75733_1x_BH2_01_20776.mzXML	11442.G75733	pure leaf lemon tea	complex	beverage	land	plant	vegetable/herb	vegetable/herb	tea/infusion	tea	tea	non-alcoholic	non-carbonated	tea	fermented	not applicable	not applicable	not applicable	not collected	2017-08-31 15:39:00	TRUE	193	urban biome	anthropogenic environmental material	food product	misc environment	none	USA:CA:San Diego	not entered	not entered	32.842	-117.258	food fermentation metagenome	not entered	1154581	Global FoodOmics	not entered	not entered	tea	host-associated	plant	plant-corpus	yes	18	not provided	not collected	not collected	not applicable	not applicable
75739_1x_rerun_BB8_01_21460.mzXML	11442.G75739	cucumber mint kombucha (organic and homegrown mint from Julia's garden)	complex	beverage	land	plant	vegetable/herb	vegetable/herb	tea/infusion	kombucha	kombucha	non-alcoholic	carbonated	kombucha	fermented	Camellia	Camellia sp.	leaf	Theaceae	2017-07-31 11:00:00	TRUE	193	urban biome	anthropogenic environmental material	food product	misc environment	none	USA:CA:San Diego	not entered	not entered	32.842	-117.258	food fermentation metagenome	not entered	1154581	Global FoodOmics	not entered	not entered	kombucha	host-associated	plant	plant-corpus	yes	18	not provided	no	not applicable	not applicable	not applicable
75749_1x_BG3_01_20768.mzXML	11442.G75749	fish sauce	complex	food	complex	complex	complex	complex	complex	complex	complex	not applicable	not applicable	not applicable	processed	not applicable	not applicable	not applicable	not collected	2017-00-0 00:00	TRUE	193	urban biome	anthropogenic environmental material	food product	misc environment	none	USA:CA:San Diego	not entered	not entered	32.842	-117.258	food fermentation metagenome	not entered	1154581	Global FoodOmics	not entered	not entered	sauce	host-associated	not applicable	not applicable	yes	18	not provided	no	not applicable	not applicable	not applicable
75750_1x_4ul_rerun_BA3_01_21390.mzXML	11442.G75750	soy sauce/tamari sauce	complex	food	land	plant	fruit	legume	legume	bean	soybean	non-alcoholic	non-carbonated	soy sauce	processed	not applicable	not applicable	not applicable	not collected	2017-10-02 21:25:00	TRUE	193	urban biome	anthropogenic environmental material	food product	misc environment	none	USA:CA:San Diego	not entered	not entered	32.842	-117.258	food fermentation metagenome	not entered	1154581	Global FoodOmics	not entered	not entered	sauce	host-associated	plant	plant-corpus	yes	18	not provided	yes	not applicable	not applicable	not applicable
75846_1x_BE3_01_20751.mzXML	11442.G75846	BDK citrus hops, kombucha	complex	beverage	land	plant	vegetable/herb	vegetable/herb	tea/infusion	kombucha	kombucha	non-alcoholic	carbonated	kombucha	processed	Camellia	Camellia sp.	leaf	Theaceae	2017-00-0 00:00	TRUE	193	urban biome	anthropogenic environmental material	food product	misc environment	none	USA:CA:San Diego	not entered	not entered	32.842	-117.258	food fermentation metagenome	not entered	1154581	Global FoodOmics	not entered	not entered	kombucha	host-associated	plant	plant-corpus	yes	18	not provided	no	not applicable	not applicable	not applicable
75904_1x_BA11_01_17394.mzXML	11442.G75094	baby spinach	simple	food	land	plant	vegetable/herb	vegetable/herb	vegetable	spinach	spinach	not applicable	not applicable	not applicable	not applicable	spinacia	Spinacia sp.	leaf	Amaranthaceae	2017-08-07 19:30:00	TRUE	193	urban biome	anthropogenic environmental material	food product	misc environment	none	USA:CA:San Diego	not entered	not entered	32.842	-117.258	food metagenome	not entered	870726	Global FoodOmics	not entered	not entered	spinach	host-associated	plant	plant-corpus	no	12	not provided	no	not applicable	not applicable	not applicable
78802_1x_BF9_01_17462.mzXML	11442.G78802	carrot	simple	food	land	plant	vegetable/herb	vegetable/herb	vegetable	carrot	carrot	not applicable	not applicable	not applicable	not applicable	Daucus	Daucus sp.	root	Apiaceae	2017-04-18 15:30:00	TRUE	193	urban biome	anthropogenic environmental material	food product	misc environment	none	USA:CA:San Diego	not entered	not entered	32.842	-117.258	food metagenome	not entered	870726	Global FoodOmics	not entered	not entered	carrot	host-associated	plant	plant-corpus	no	12	not provided	no	not applicable	not applicable	not applicable
78806_1x_BG11_01_17510.mzXML	11442.G78806	Garden Onion top (white onion)	simple	food	land	plant	vegetable/herb	vegetable/herb	vegetable	onion	white onion	not applicable	not applicable	not applicable	not applicable	Allium	Allium sp.	stem	Amaryllidaceae	2017-04-30	TRUE	193	urban biome	anthropogenic environmental material	food product	misc environment	none	USA:CA:San Diego	not entered	not entered	32.842	-117.258	food metagenome	not entered	870726	Global FoodOmics	not entered	not entered	onion	host-associated	plant	plant-corpus	no	12	not provided	no	not applicable	not applicable	not applicable
78808_5x_RE12_01_17452.mzXML	11442.G78808	Garden Blueberry	simple	food	land	plant	fruit	fleshy fruit	berry	blueberry	blueberry	not applicable	not applicable	not applicable	not applicable	vaccinium	vaccinium sp.	fruit	Ericaceae	2017-05-01	TRUE	193	urban biome	anthropogenic environmental material	food product	misc environment	deep purple/pink	USA:CA:San Diego	not entered	not entered	32.842	-117.258	food metagenome	not entered	870726	Global FoodOmics	not entered	not entered	berry	host-associated	plant	plant-corpus	no	12	not provided	no	not applicable	not applicable	not applicable
78810_1x_BF12_01_17484.mzXML	11442.G78810	Garden cilantro (from seed)	simple	food	land	plant	vegetable/herb	vegetable/herb	herb/spice	cilantro	cilantro	not applicable	not applicable	not applicable	not applicable	coriandrum	coriandrum sp.	leaf	Apiaceae	2017-05-01	TRUE	193	urban biome	anthropogenic environmental material	food product	misc environment	bright green	USA:CA:San Diego	not entered	not entered	32.842	-117.258	food metagenome	not entered	870726	Global FoodOmics	not entered	not entered	herb	host-associated	plant	plant-corpus	no	12	not provided	no	not applicable	not applicable	not applicable
78812_5x_RA5_01_17388.mzXML	11442.G78812	Garden kale (can't remember if this one was from seed or starter)	simple	food	land	plant	vegetable/herb	vegetable/herb	vegetable	kale	kale	not applicable	not applicable	not applicable	not applicable	Brassica	Brassica sp.	leaf	Brassicaceae	2017-05-01	TRUE	193	urban biome	anthropogenic environmental material	food product	misc environment	bright green	USA:CA:San Diego	not entered	not entered	32.842	-117.258	food metagenome	not entered	870726	Global FoodOmics	not entered	not entered	kale	host-associated	plant	plant-corpus	no	12	not provided	no	not applicable	not applicable	not applicable
78813_1x_BA6_01_17389.mzXML	11442.G78813	Garden Arugula (from seed)	simple	food	land	plant	vegetable/herb	vegetable/herb	vegetable	arugula	arugula	not applicable	not applicable	not applicable	not applicable	eruca	eruca sp.	leaf	Brassicaceae	2017-05-01	TRUE	193	urban biome	anthropogenic environmental material	food product	misc environment	bright green	USA:CA:San Diego	not entered	not entered	32.842	-117.258	food metagenome	not entered	870726	Global FoodOmics	not entered	not entered	arugula	host-associated	plant	plant-corpus	no	12	not provided	no	not applicable	not applicable	not applicable
78814_1x_BB5_01_17424.mzXML	11442.G78814	Garden nasturtium leaf	simple	food	land	plant	vegetable/herb	vegetable/herb	vegetable	nasturtium leaf	nasturtium	not applicable	not applicable	not applicable	not applicable	Tropaeolum	Tropaeolum sp.	leaf	Tropaeolaceae	2017-05-01	TRUE	193	urban biome	anthropogenic environmental material	food product	misc environment	bright green	USA:CA:San Diego	not entered	not entered	32.842	-117.258	food metagenome	not entered	870726	Global FoodOmics	not entered	not entered	herb	host-associated	plant	plant-corpus	no	12	not provided	no	not applicable	not applicable	not applicable
78815_1x_BB11_01_17407.mzXML	11442.G78815	Garden nasturtium flower	simple	food	land	plant	vegetable/herb	vegetable/herb	flower	nasturtium	nasturtium	not applicable	not applicable	not applicable	not applicable	Tropaeolum	Tropaeolum sp.	flower	Tropaeolaceae	2017-05-01	TRUE	193	urban biome	anthropogenic environmental material	food product	misc environment	yellow	USA:CA:San Diego	not entered	not entered	32.842	-117.258	food metagenome	not entered	870726	Global FoodOmics	not entered	not entered	flower	host-associated	plant	plant-corpus	no	12	not provided	no	not applicable	not applicable	not applicable
78816_5x_RH5_01_17511.mzXML	11442.G78816	Garden Broccoli from heirloom seeds	simple	food	land	plant	vegetable/herb	vegetable/herb	flower	broccoli	broccoli	not applicable	not applicable	not applicable	not applicable	Brassica	Brassica sp.	flower	Brassicaceae	2017-05-01	TRUE	193	urban biome	anthropogenic environmental material	food product	misc environment	bright green	USA:CA:San Diego	not entered	not entered	32.842	-117.258	food metagenome	not entered	870726	Global FoodOmics	not entered	not entered	broccoli	host-associated	plant	plant-corpus	no	12	not provided	no	not applicable	not applicable	not applicable
78817_1x_BH11_01_17515.mzXML	11442.G78817	Garden lettuce from heirloom seed mix greens	simple	food	land	plant	vegetable/herb	vegetable/herb	vegetable	lettuce	heirloom lettuce	not applicable	not applicable	not applicable	not applicable	Lactuca	Lactuca sp.	leaf	Asteraceae	2017-05-01	TRUE	193	urban biome	anthropogenic environmental material	food product	misc environment	bright green	USA:CA:San Diego	not entered	not entered	32.842	-117.258	food metagenome	not entered	870726	Global FoodOmics	not entered	not entered	lettuce	host-associated	plant	plant-corpus	no	12	not provided	no	not applicable	not applicable	not applicable
78821_1x_BE6_01_17446.mzXML	11442.G78821	Store bought Olives Green	complex	food	land	plant	fruit	fleshy fruit	drupe	olive	green olive	not applicable	not applicable	not applicable	preserved in brine	Olea	Olea sp.	fruit	Oleaceae	2017-05-01	TRUE	193	urban biome	anthropogenic environmental material	food product	misc environment	yellow/green	USA:CA:San Diego	not entered	not entered	32.842	-117.258	food fermentation metagenome	not entered	1154581	Global FoodOmics	not entered	not entered	olive	host-associated	plant	plant-corpus	yes	12	not provided	no	not applicable	not applicable	not applicable
78832_1x_BH12_01_17516.mzXML	11442.G78832	Garden Garlic tops	simple	food	land	plant	vegetable/herb	vegetable/herb	vegetable	garlic	garlic tops	not applicable	not applicable	not applicable	not applicable	Allium	Allium sp.	stem	Amaryllidaceae	2017-04-30	TRUE	193	urban biome	anthropogenic environmental material	food product	misc environment	bright green	USA:CA:San Diego	not entered	not entered	32.842	-117.258	food metagenome	not entered	870726	Global FoodOmics	not entered	not entered	spice	host-associated	plant	plant-corpus	no	12	not provided	no	not applicable	not applicable	not applicable
78841_1x_BD6_01_17433.mzXML	11442.G78841	Instant Potatoes, microwaveble	complex	food	land	complex	complex	complex	complex	complex	complex	not applicable	not applicable	not applicable	processed	Solanum	Solanum sp.	tuber	Solanaceae	2017-05-01	TRUE	193	urban biome	anthropogenic environmental material	food product	misc environment	none	USA:CA:San Diego	not entered	not entered	32.842	-117.258	food metagenome	not entered	870726	Global FoodOmics	not entered	not entered	potato	host-associated	plant	plant-corpus	no	12	not provided	no	not applicable	not applicable	not applicable
78845_1x_BG6_01_20772.mzXML	11442.G78845	barefoot merlot	simple	beverage	land	plant	fruit	fleshy fruit	berry	grape_fermented	merlot	alcoholic	non-carbonated	red wine	fermented	Vitis	Vitis sp.	fruit	Vitaceae	2017-04-23	TRUE	193	urban biome	anthropogenic environmental material	food product	misc environment	red	USA:CA:San Diego	not entered	not entered	32.842	-117.258	food fermentation metagenome	not entered	1154581	Global FoodOmics	not entered	not entered	wine	host-associated	plant	plant-corpus	yes	18	not provided	no	not applicable	not applicable	not applicable
78850_1x_BH6_01_20780.mzXML	11442.G78850	Balsamic vinegar cherry wood aged napa valley naturals	complex	food	land	plant	fruit	fleshy fruit	berry	grape	grape	not applicable	not applicable	not applicable	fermented	not applicable	not applicable	not applicable	not applicable	2017-04-30 17:00:00	TRUE	193	urban biome	anthropogenic environmental material	food product	misc environment	none	USA:CA:San Diego	not entered	not entered	32.842	-117.258	food metagenome	not entered	870726	Global FoodOmics	not entered	not entered	vinegar	host-associated	plant	plant-corpus	no	18	not provided	no	not applicable	not applicable	not applicable
78856_1x_BF6_01_20763.mzXML	11442.G78856	soy sauce	complex	food	land	plant	fruit	complex	complex	complex	complex	not applicable	not applicable	not applicable	fermented	not applicable	not applicable	not applicable	not applicable	2017-04-30 17:00:00	TRUE	193	urban biome	anthropogenic environmental material	food product	misc environment	none	USA:CA:San Diego	not entered	not entered	32.842	-117.258	food fermentation metagenome	not entered	1154581	Global FoodOmics	not entered	not entered	soy sauce	host-associated	plant	plant-corpus	yes	18	not provided	not collected	not collected	not applicable	not applicable
79166_1x_BA8_01_17391.mzXML	11442.G79166	jalapeno	simple	food	land	plant	fruit	fleshy fruit	berry	pepper	jalapeno pepper	not applicable	not applicable	not applicable	not applicable	Capsicum	Capsicum sp.	fruit	Solanaceae	2017-09-03 13:45:00	TRUE	15	urban biome	anthropogenic environmental material	food product	misc environment	none	USA:OR:Portland	not entered	not entered	45.5231	122.677	food metagenome	not entered	870726	Global FoodOmics	not entered	not entered	pepper	host-associated	plant	plant-corpus	no	12	not provided	no	not applicable	not applicable	not applicable
Amazon_1_2x_RA1_01_21596.mzXML	amazon_1	Yellow_cassava	simple	food	land	plant	vegetable/herb	vegetable/herb	vegetable	cassava	yellow cassava	not applicable	not applicable	not applicable	not entered	not entered	not entered	not entered	not entered	not entered	not entered	not entered	urban biome	anthropogenic environmental material	food product	misc environment	not applicable	not entered	not entered	not entered	not entered	not entered	not entered	not entered	not entered	not entered	not applicable	not applicable	tuber	host-associated	plant	plant-corpus	no	not applicable	not provided	no	not applicable	not applicable	not applicable
Amazon_10_2x_RA10_01_21606.mzXML	amazon_10	Tupiro	simple	food	land	plant	fruit	fleshy fruit	berry	tupiro	tupiro	not applicable	not applicable	not applicable	not entered	Solanum	Solanum sessiliflorum	fruit	Solanaceae	not entered	not entered	not entered	urban biome	anthropogenic environmental material	food product	misc environment	not applicable	not entered	not entered	not entered	not entered	not entered	not entered	not entered	not entered	not entered	not applicable	not applicable	fruit	host-associated	plant	plant-corpus	no	not applicable	not provided	no	not applicable	not applicable	not applicable
Amazon_11_2x_RA11_01_21607.mzXML	amazon_11	Maoco	simple	food	land	plant	vegetable/herb	vegetable/herb	vegetable	yuca	yuca	not applicable	not applicable	not applicable	not entered	not entered	not entered	not entered	not entered	not entered	not entered	not entered	urban biome	anthropogenic environmental material	food product	misc environment	not applicable	not entered	not entered	not entered	not entered	not entered	not entered	not entered	not entered	not entered	not applicable	not applicable	tuber	host-associated	plant	plant-corpus	no	not applicable	not provided	no	not applicable	not applicable	not applicable
Amazon_2_2x_RA2_01_21597.mzXML	amazon_2	Pavon_fish_soup	complex	food	complex	complex	complex	complex	complex	complex	complex	not applicable	not applicable	not applicable	not entered	not entered	not entered	not entered	not entered	not entered	not entered	not entered	urban biome	anthropogenic environmental material	food product	misc environment	not applicable	not entered	not entered	not entered	not entered	not entered	not entered	not entered	not entered	not entered	not applicable	not applicable	soup	host-associated	not applicable	not applicable	no	not applicable	not provided	no	not applicable	not applicable	not applicable
Amazon_3_2x_RA3_01_21598.mzXML	amazon_3	Small_red_hot_chili_pepper	simple	food	land	plant	fruit	fleshy fruit	berry	pepper	chili pepper	not applicable	not applicable	not applicable	not entered	Capsicum	Capsicum sp.	fruit	Solanaceae	not entered	not entered	not entered	urban biome	anthropogenic environmental material	food product	misc environment	not applicable	not entered	not entered	not entered	not entered	not entered	not entered	not entered	not entered	not entered	not applicable	not applicable	pepper	host-associated	plant	plant-corpus	no	not applicable	not provided	no	not applicable	not applicable	not applicable
Amazon_4_2x_RA4_01_21599.mzXML	amazon_4	Copohazu_pulp	simple	food	land	plant	fruit	fleshy fruit	drupe	copohazu	copohazu	not applicable	not applicable	not applicable	not entered	Theobroma	Theobroma grandiflorum	fruit	Malvaceae	not entered	not entered	not entered	urban biome	anthropogenic environmental material	food product	misc environment	not applicable	not entered	not entered	not entered	not entered	not entered	not entered	not entered	not entered	not entered	not applicable	not applicable	fruit	host-associated	plant	plant-corpus	no	not applicable	not provided	no	not applicable	not applicable	not applicable
Amazon_5_2x_RA5_01_21600.mzXML	amazon_5	Cooked_guada	simple	food	land	plant	fruit	fleshy fruit	not provided	guada hervida	guada hervida	not applicable	not applicable	not applicable	not entered	not entered	not entered	not entered	not entered	not entered	not entered	not entered	urban biome	anthropogenic environmental material	food product	misc environment	not applicable	not entered	not entered	not entered	not entered	not entered	not entered	not entered	not entered	not entered	not applicable	not applicable	fruit	host-associated	plant	plant-corpus	no	not applicable	not provided	no	not applicable	not applicable	not applicable
Amazon_6_2x_RA6_01_21602.mzXML	amazon_6	Moriche	simple	food	land	plant	fruit	fleshy fruit	not provided	moriche palm	moriche palm	not applicable	not applicable	not applicable	not entered	Mauritia	Mauritia flexuosa	fruit	Arecaceae	not entered	not entered	not entered	urban biome	anthropogenic environmental material	food product	misc environment	not applicable	not entered	not entered	not entered	not entered	not entered	not entered	not entered	not entered	not entered	not applicable	not applicable	fruit	host-associated	plant	plant-corpus	no	not applicable	not provided	no	not applicable	not applicable	not applicable
Amazon_7_2x_RA7_01_21603.mzXML	amazon_7	Aji_tornillito	simple	food	land	plant	fruit	fleshy fruit	berry	pepper	chili pepper	not applicable	not applicable	not applicable	not entered	not entered	not entered	not entered	not entered	not entered	not entered	not entered	urban biome	anthropogenic environmental material	food product	misc environment	not applicable	not entered	not entered	not entered	not entered	not entered	not entered	not entered	not entered	not entered	not applicable	not applicable	fruit	host-associated	plant	plant-corpus	no	not applicable	not provided	no	not applicable	not applicable	not applicable
Amazon_8_2x_RA8_01_21604.mzXML	amazon_8	Tamari	simple	food	land	animal	insect	insect	insect	insect	insect	not applicable	not applicable	not applicable	not entered	not entered	not entered	not entered	not entered	not entered	not entered	not entered	urban biome	anthropogenic environmental material	food product	misc environment	not applicable	not entered	not entered	not entered	not entered	not entered	not entered	not entered	not entered	not entered	not applicable	not applicable	insect	host-associated	animal	animal-corpus	no	not applicable	not provided	no	not applicable	not applicable	not applicable
Amazon_9_2x_RA9_01_21605.mzXML	amazon_9	Tarantule	simple	food	land	animal	arthropod	arthropod	arthropod	tarantula	tarantula	not applicable	not applicable	not applicable	not entered	not entered	not entered	not entered	not entered	not entered	not entered	not entered	urban biome	anthropogenic environmental material	food product	misc environment	not applicable	not entered	not entered	not entered	not entered	not entered	not entered	not entered	not entered	not entered	not applicable	not applicable	meat	host-associated	animal	animal-corpus	no	not applicable	not provided	no	not applicable	not applicable	not applicable
AMZ_1_tk2_RA2_01_48879.mzXML	AMZ_01	Cheese pastry	complex	food	land	complex	complex	complex	complex	complex	complex	not applicable	not applicable	not applicable	not entered	not entered	not entered	not entered	not entered	not entered	not entered	not entered	urban biome	anthropogenic environmental material	food product	misc environment	not applicable	not entered	not entered	not entered	not entered	not entered	not entered	not entered	not entered	not entered	not applicable	not applicable	not entered	host-associated	not applicable	not applicable	yes	not applicable	not entered	not entered	not entered	not entered	not entered
AMZ_10_tk2_RA11_01_48975.mzXML	AMZ_10	White rice	complex	food	land	plant	complex	complex	complex	complex	complex	not applicable	not applicable	not applicable	not entered	not entered	not entered	not entered	not entered	not entered	not entered	not entered	urban biome	anthropogenic environmental material	food product	misc environment	not applicable	not entered	not entered	not entered	not entered	not entered	not entered	not entered	not entered	not entered	not applicable	not applicable	not entered	host-associated	not applicable	not applicable	no	not applicable	not entered	not entered	not entered	not entered	not entered
AMZ_11_RB2_01_48905.mzXML	AMZ_11	Lentils cooked with bacon	complex	food	land	complex	complex	complex	complex	complex	complex	not applicable	not applicable	not applicable	not entered	not entered	not entered	not entered	not entered	not entered	not entered	not entered	urban biome	anthropogenic environmental material	food product	misc environment	not applicable	not entered	not entered	not entered	not entered	not entered	not entered	not entered	not entered	not entered	not applicable	not applicable	not entered	host-associated	not applicable	not applicable	no	not applicable	not entered	not entered	not entered	not entered	not entered
AMZ_12_RB3_01_48908.mzXML	AMZ_12	Fried egg	complex	food	land	complex	complex	complex	complex	complex	complex	not applicable	not applicable	not applicable	not entered	not entered	not entered	not entered	not entered	not entered	not entered	not entered	urban biome	anthropogenic environmental material	food product	misc environment	not applicable	not entered	not entered	not entered	not entered	not entered	not entered	not entered	not entered	not entered	not applicable	not applicable	not entered	host-associated	not applicable	not applicable	no	not applicable	not entered	not entered	not entered	not entered	not entered
AMZ_13_RB4_01_49040.mzXML	AMZ_13	Cow liver with onion	complex	food	land	complex	complex	complex	complex	complex	complex	not applicable	not applicable	not applicable	not entered	not entered	not entered	not entered	not entered	not entered	not entered	not entered	urban biome	anthropogenic environmental material	food product	misc environment	not applicable	not entered	not entered	not entered	not entered	not entered	not entered	not entered	not entered	not entered	not applicable	not applicable	not entered	host-associated	not applicable	not applicable	no	not applicable	not entered	not entered	not entered	not entered	not entered
AMZ_14_RB5_01_49038.mzXML	AMZ_14	Fried arepa	complex	food	land	plant	complex	complex	complex	complex	complex	not applicable	not applicable	not applicable	not entered	not entered	not entered	not entered	not entered	not entered	not entered	not entered	urban biome	anthropogenic environmental material	food product	misc environment	not applicable	not entered	not entered	not entered	not entered	not entered	not entered	not entered	not entered	not entered	not applicable	not applicable	not entered	host-associated	not applicable	not applicable	no	not applicable	not entered	not entered	not entered	not entered	not entered
AMZ_15_RB6_01_48916.mzXML	AMZ_15	Traditional cake	complex	food	land	complex	complex	complex	complex	complex	complex	not applicable	not applicable	not applicable	not entered	not entered	not entered	not entered	not entered	not entered	not entered	not entered	urban biome	anthropogenic environmental material	food product	misc environment	not applicable	not entered	not entered	not entered	not entered	not entered	not entered	not entered	not entered	not entered	not applicable	not applicable	not entered	host-associated	not applicable	not applicable	no	not applicable	not entered	not entered	not entered	not entered	not entered
AMZ_16_RB7_01_49037.mzXML	AMZ_16	Baked arepas filled with canned jam (diablito) and mayonesse	complex	food	land	complex	complex	complex	complex	complex	complex	not applicable	not applicable	not applicable	not entered	not entered	not entered	not entered	not entered	not entered	not entered	not entered	urban biome	anthropogenic environmental material	food product	misc environment	not applicable	not entered	not entered	not entered	not entered	not entered	not entered	not entered	not entered	not entered	not applicable	not applicable	not entered	host-associated	not applicable	not applicable	no	not applicable	not entered	not entered	not entered	not entered	not entered
AMZ_17_tk2_RB8_01_48980.mzXML	AMZ_17	Boiled plantain	simple	food	land	plant	fruit	fleshy fruit	berry	plantain	plantain	not applicable	not applicable	not applicable	not entered	not entered	not entered	not entered	not entered	not entered	not entered	not entered	urban biome	anthropogenic environmental material	food product	misc environment	not applicable	not entered	not entered	not entered	not entered	not entered	not entered	not entered	not entered	not entered	not applicable	not applicable	not entered	host-associated	plant	plant-corpus	no	not applicable	not entered	not entered	not entered	not entered	not entered
AMZ_18_RB9_01_48924.mzXML	AMZ_18	Rice with chicken	complex	food	land	complex	complex	complex	complex	complex	complex	not applicable	not applicable	not applicable	not entered	not entered	not entered	not entered	not entered	not entered	not entered	not entered	urban biome	anthropogenic environmental material	food product	misc environment	not applicable	not entered	not entered	not entered	not entered	not entered	not entered	not entered	not entered	not entered	not applicable	not applicable	not entered	host-associated	not applicable	not applicable	no	not applicable	not entered	not entered	not entered	not entered	not entered
AMZ_19_RB10_01_48927.mzXML	AMZ_19	Boiled yucca	simple	food	land	plant	vegetable/herb	vegetable/herb	vegetable	yuca	yuca	not applicable	not applicable	not applicable	not entered	not entered	not entered	not entered	not entered	not entered	not entered	not entered	urban biome	anthropogenic environmental material	food product	misc environment	not applicable	not entered	not entered	not entered	not entered	not entered	not entered	not entered	not entered	not entered	not applicable	not applicable	not entered	host-associated	plant	plant-corpus	no	not applicable	not entered	not entered	not entered	not entered	not entered
AMZ_2_RA3_01_48881.mzXML	AMZ_02	Spagetties, black beans, cooked mortadella	complex	food	land	complex	complex	complex	complex	complex	complex	not applicable	not applicable	not applicable	not entered	not entered	not entered	not entered	not entered	not entered	not entered	not entered	urban biome	anthropogenic environmental material	food product	misc environment	not applicable	not entered	not entered	not entered	not entered	not entered	not entered	not entered	not entered	not entered	not applicable	not applicable	not entered	host-associated	not applicable	not applicable	no	not applicable	not entered	not entered	not entered	not entered	not entered
AMZ_20_RB11_01_48930.mzXML	AMZ_20	Yucca cake	complex	food	land	complex	complex	complex	complex	complex	complex	not applicable	not applicable	not applicable	not entered	not entered	not entered	not entered	not entered	not entered	not entered	not entered	urban biome	anthropogenic environmental material	food product	misc environment	not applicable	not entered	not entered	not entered	not entered	not entered	not entered	not entered	not entered	not entered	not applicable	not applicable	not entered	host-associated	not applicable	not applicable	yes	not applicable	not entered	not entered	not entered	not entered	not entered
AMZ_21_RC2_01_48934.mzXML	AMZ_21	Rice	complex	food	land	complex	complex	complex	complex	complex	complex	not applicable	not applicable	not applicable	not entered	not entered	not entered	not entered	not entered	not entered	not entered	not entered	urban biome	anthropogenic environmental material	food product	misc environment	not applicable	not entered	not entered	not entered	not entered	not entered	not entered	not entered	not entered	not entered	not applicable	not applicable	not entered	host-associated	not applicable	not applicable	no	not applicable	not entered	not entered	not entered	not entered	not entered
AMZ_22_RC3_01_48937.mzXML	AMZ_22	Chicken	complex	food	land	complex	complex	complex	complex	complex	complex	not applicable	not applicable	not applicable	not entered	not entered	not entered	not entered	not entered	not entered	not entered	not entered	urban biome	anthropogenic environmental material	food product	misc environment	not applicable	not entered	not entered	not entered	not entered	not entered	not entered	not entered	not entered	not entered	not applicable	not applicable	not entered	host-associated	not applicable	not applicable	no	not applicable	not entered	not entered	not entered	not entered	not entered
AMZ_23_RC4_01_48940.mzXML	AMZ_23	Green fried plaintain	complex	food	land	plant	complex	complex	complex	complex	complex	not applicable	not applicable	not applicable	not entered	not entered	not entered	not entered	not entered	not entered	not entered	not entered	urban biome	anthropogenic environmental material	food product	misc environment	not applicable	not entered	not entered	not entered	not entered	not entered	not entered	not entered	not entered	not entered	not applicable	not applicable	not entered	host-associated	plant	plant-corpus	no	not applicable	not entered	not entered	not entered	not entered	not entered
AMZ_24_RC5_01_48943.mzXML	AMZ_24	Plantain	complex	food	land	plant	fruit	fleshy fruit	berry	plantain	plantain	not applicable	not applicable	not applicable	not entered	not entered	not entered	not entered	not entered	not entered	not entered	not entered	urban biome	anthropogenic environmental material	food product	misc environment	not applicable	not entered	not entered	not entered	not entered	not entered	not entered	not entered	not entered	not entered	not applicable	not applicable	not entered	host-associated	plant	plant-corpus	no	not applicable	not entered	not entered	not entered	not entered	not entered
AMZ_25_RC6_01_48945.mzXML	AMZ_25	Stewed meat	complex	food	land	complex	complex	complex	complex	complex	complex	not applicable	not applicable	not applicable	not entered	not entered	not entered	not entered	not entered	not entered	not entered	not entered	urban biome	anthropogenic environmental material	food product	misc environment	not applicable	not entered	not entered	not entered	not entered	not entered	not entered	not entered	not entered	not entered	not applicable	not applicable	not entered	host-associated	not applicable	not applicable	no	not applicable	not entered	not entered	not entered	not entered	not entered
AMZ_26_RC7_01_48947.mzXML	AMZ_26	Rice	complex	food	land	plant	complex	complex	complex	complex	complex	not applicable	not applicable	not applicable	not entered	not entered	not entered	not entered	not entered	not entered	not entered	not entered	urban biome	anthropogenic environmental material	food product	misc environment	not applicable	not entered	not entered	not entered	not entered	not entered	not entered	not entered	not entered	not entered	not applicable	not applicable	not entered	host-associated	not applicable	not applicable	no	not applicable	not entered	not entered	not entered	not entered	not entered
AMZ_27_RC8_01_48949.mzXML	AMZ_27	Fried catfish with soya oil (no skin)	complex	food	complex	complex	complex	complex	complex	complex	complex	not applicable	not applicable	not applicable	not entered	not entered	not entered	not entered	not entered	not entered	not entered	not entered	urban biome	anthropogenic environmental material	food product	misc environment	not applicable	not entered	not entered	not entered	not entered	not entered	not entered	not entered	not entered	not entered	not applicable	not applicable	not entered	host-associated	not applicable	not applicable	no	not applicable	not entered	not entered	not entered	not entered	not entered
AMZ_28_RC9_01_48951.mzXML	AMZ_28	bean dish	complex	food	land	plant	complex	complex	complex	complex	complex	not applicable	not applicable	not applicable	not entered	not entered	not entered	not entered	not entered	not entered	not entered	not entered	urban biome	anthropogenic environmental material	food product	misc environment	not applicable	not entered	not entered	not entered	not entered	not entered	not entered	not entered	not entered	not entered	not applicable	not applicable	not entered	host-associated	not applicable	not applicable	no	not applicable	not entered	not entered	not entered	not entered	not entered
AMZ_29_RC10_01_48954.mzXML	AMZ_29	Baked arepa	complex	food	land	plant	complex	complex	complex	complex	complex	not applicable	not applicable	not applicable	not entered	not entered	not entered	not entered	not entered	not entered	not entered	not entered	urban biome	anthropogenic environmental material	food product	misc environment	not applicable	not entered	not entered	not entered	not entered	not entered	not entered	not entered	not entered	not entered	not applicable	not applicable	not entered	host-associated	not applicable	not applicable	no	not applicable	not entered	not entered	not entered	not entered	not entered
AMZ_3_RA4_01_48882.mzXML	AMZ_03	Bread filled with fried egg	complex	food	land	complex	complex	complex	complex	complex	complex	not applicable	not applicable	not applicable	not entered	not entered	not entered	not entered	not entered	not entered	not entered	not entered	urban biome	anthropogenic environmental material	food product	misc environment	not applicable	not entered	not entered	not entered	not entered	not entered	not entered	not entered	not entered	not entered	not applicable	not applicable	not entered	host-associated	not applicable	not applicable	yes	not applicable	not entered	not entered	not entered	not entered	not entered
AMZ_30_RC11_01_48956.mzXML	AMZ_30	Fried egg	complex	food	land	complex	complex	complex	complex	complex	complex	not applicable	not applicable	not applicable	not entered	not entered	not entered	not entered	not entered	not entered	not entered	not entered	urban biome	anthropogenic environmental material	food product	misc environment	not applicable	not entered	not entered	not entered	not entered	not entered	not entered	not entered	not entered	not entered	not applicable	not applicable	not entered	host-associated	not applicable	not applicable	no	not applicable	not entered	not entered	not entered	not entered	not entered
AMZ_31_tk2_RD2_01_48960.mzXML	AMZ_31	Rice with catara	complex	food	land	complex	complex	complex	complex	complex	complex	not applicable	not applicable	not applicable	not entered	not entered	not entered	not entered	not entered	not entered	not entered	not entered	urban biome	anthropogenic environmental material	food product	misc environment	not applicable	not entered	not entered	not entered	not entered	not entered	not entered	not entered	not entered	not entered	not applicable	not applicable	not entered	host-associated	not applicable	not applicable	no	not applicable	not entered	not entered	not entered	not entered	not entered
AMZ_32_RD3_01_48961.mzXML	AMZ_32	Fried egg	complex	food	land	complex	complex	complex	complex	complex	complex	not applicable	not applicable	not applicable	not entered	not entered	not entered	not entered	not entered	not entered	not entered	not entered	urban biome	anthropogenic environmental material	food product	misc environment	not applicable	not entered	not entered	not entered	not entered	not entered	not entered	not entered	not entered	not entered	not applicable	not applicable	not entered	host-associated	not applicable	not applicable	no	not applicable	not entered	not entered	not entered	not entered	not entered
AMZ_33_RD4_01_48963.mzXML	AMZ_33	Rice	complex	food	land	plant	complex	complex	complex	complex	complex	not applicable	not applicable	not applicable	not entered	not entered	not entered	not entered	not entered	not entered	not entered	not entered	urban biome	anthropogenic environmental material	food product	misc environment	not applicable	not entered	not entered	not entered	not entered	not entered	not entered	not entered	not entered	not entered	not applicable	not applicable	not entered	host-associated	not applicable	not applicable	no	not applicable	not entered	not entered	not entered	not entered	not entered
AMZ_34_RD5_01_48964.mzXML	AMZ_34	Fried chiken with catara	complex	food	land	complex	complex	complex	complex	complex	complex	not applicable	not applicable	not applicable	not entered	not entered	not entered	not entered	not entered	not entered	not entered	not entered	urban biome	anthropogenic environmental material	food product	misc environment	not applicable	not entered	not entered	not entered	not entered	not entered	not entered	not entered	not entered	not entered	not applicable	not applicable	not entered	host-associated	not applicable	not applicable	no	not applicable	not entered	not entered	not entered	not entered	not entered
AMZ_35_RD6_01_49036.mzXML	AMZ_35	Cashew (Anacardium occidentale)	simple	food	land	plant	fruit	fleshy fruit	drupe	cashew	cashew	not applicable	not applicable	not applicable	not entered	Anacardium	Anacardium occidentale	fruit	Anacardiaceae	not entered	not entered	not entered	urban biome	anthropogenic environmental material	food product	misc environment	not applicable	not entered	not entered	not entered	not entered	not entered	not entered	not entered	not entered	not entered	not applicable	not applicable	not entered	host-associated	plant	plant-corpus	no	not applicable	not entered	not entered	not entered	not entered	not entered
AMZ_36_RD7_01_48967.mzXML	AMZ_36	Pasta with cheese	complex	food	land	complex	complex	complex	complex	complex	complex	not applicable	not applicable	not applicable	not entered	not entered	not entered	not entered	not entered	not entered	not entered	not entered	urban biome	anthropogenic environmental material	food product	misc environment	not applicable	not entered	not entered	not entered	not entered	not entered	not entered	not entered	not entered	not entered	not applicable	not applicable	not entered	host-associated	not applicable	not applicable	yes	not applicable	not entered	not entered	not entered	not entered	not entered
AMZ_37_RD8_01_48977.mzXML	AMZ_37	Cocura pulp (no skin)	simple	food	land	plant	fruit	fleshy fruit	not provided	cocura	cocura	not applicable	not applicable	not applicable	not entered	not entered	not entered	fruit	not entered	not entered	not entered	not entered	urban biome	anthropogenic environmental material	food product	misc environment	not applicable	not entered	not entered	not entered	not entered	not entered	not entered	not entered	not entered	not entered	not applicable	not applicable	not entered	host-associated	plant	plant-corpus	no	not applicable	not entered	not entered	not entered	not entered	not entered
AMZ_38_RD9_01_48978.mzXML	AMZ_38	Red pijiguao	simple	food	land	plant	fruit	fleshy fruit	not provided	palm fruit	palm fruit	not applicable	not applicable	not applicable	not entered	Bactris	Bactris gasipaes	fruit	Arecaceae	not entered	not entered	not entered	urban biome	anthropogenic environmental material	food product	misc environment	not applicable	not entered	not entered	not entered	not entered	not entered	not entered	not entered	not entered	not entered	not applicable	not applicable	not entered	host-associated	plant	plant-corpus	no	not applicable	not entered	not entered	not entered	not entered	not entered
AMZ_39_RD10_01_48981.mzXML	AMZ_39	Boiled fish	complex	food	complex	complex	complex	complex	complex	complex	complex	not applicable	not applicable	not applicable	not entered	not entered	not entered	not entered	not entered	not entered	not entered	not entered	urban biome	anthropogenic environmental material	food product	misc environment	not applicable	not entered	not entered	not entered	not entered	not entered	not entered	not entered	not entered	not entered	not applicable	not applicable	not entered	host-associated	not applicable	not applicable	no	not applicable	not entered	not entered	not entered	not entered	not entered
AMZ_4_tk2_RA5_01_48887.mzXML	AMZ_04	Tuna with manoco	complex	food	complex	complex	complex	complex	complex	complex	complex	not applicable	not applicable	not applicable	not entered	not entered	not entered	not entered	not entered	not entered	not entered	not entered	urban biome	anthropogenic environmental material	food product	misc environment	not applicable	not entered	not entered	not entered	not entered	not entered	not entered	not entered	not entered	not entered	not applicable	not applicable	not entered	host-associated	not applicable	not applicable	no	not applicable	not entered	not entered	not entered	not entered	not entered
AMZ_40_RD11_01_48984.mzXML	AMZ_40	Manoco	simple	food	land	plant	vegetable/herb	vegetable/herb	vegetable	cassava	cassava flour	not applicable	not applicable	not applicable	not entered	not entered	not entered	not entered	not entered	not entered	not entered	not entered	urban biome	anthropogenic environmental material	food product	misc environment	not applicable	not entered	not entered	not entered	not entered	not entered	not entered	not entered	not entered	not entered	not applicable	not applicable	cassava flour	host-associated	plant	plant-corpus	no	not applicable	not entered	not entered	not entered	not entered	not entered
AMZ_41_RE2_01_48968.mzXML	AMZ_41	Pasta with cheese	complex	food	land	complex	complex	complex	complex	complex	complex	not applicable	not applicable	not applicable	not entered	not entered	not entered	not entered	not entered	not entered	not entered	not entered	urban biome	anthropogenic environmental material	food product	misc environment	not applicable	not entered	not entered	not entered	not entered	not entered	not entered	not entered	not entered	not entered	not applicable	not applicable	not entered	host-associated	not applicable	not applicable	yes	not applicable	not entered	not entered	not entered	not entered	not entered
AMZ_42_RE3_01_48985.mzXML	AMZ_42	Chicken	complex	food	land	complex	complex	complex	complex	complex	complex	not applicable	not applicable	not applicable	not entered	not entered	not entered	not entered	not entered	not entered	not entered	not entered	urban biome	anthropogenic environmental material	food product	misc environment	not applicable	not entered	not entered	not entered	not entered	not entered	not entered	not entered	not entered	not entered	not applicable	not applicable	not entered	host-associated	not applicable	not applicable	no	not applicable	not entered	not entered	not entered	not entered	not entered
AMZ_43_RE4_01_48972.mzXML	AMZ_43	Rice	complex	food	land	plant	complex	complex	complex	complex	complex	not applicable	not applicable	not applicable	not entered	not entered	not entered	not entered	not entered	not entered	not entered	not entered	urban biome	anthropogenic environmental material	food product	misc environment	not applicable	not entered	not entered	not entered	not entered	not entered	not entered	not entered	not entered	not entered	not applicable	not applicable	not entered	host-associated	not applicable	not applicable	no	not applicable	not entered	not entered	not entered	not entered	not entered
AMZ_44_RE5_01_48986.mzXML	AMZ_44	Red meat	complex	food	land	complex	complex	complex	complex	complex	complex	not applicable	not applicable	not applicable	not entered	not entered	not entered	not entered	not entered	not entered	not entered	not entered	urban biome	anthropogenic environmental material	food product	misc environment	not applicable	not entered	not entered	not entered	not entered	not entered	not entered	not entered	not entered	not entered	not applicable	not applicable	not entered	host-associated	not applicable	not applicable	no	not applicable	not entered	not entered	not entered	not entered	not entered
AMZ_45_RE6_01_48973.mzXML	AMZ_45	Rice	complex	food	land	complex	complex	complex	complex	complex	complex	not applicable	not applicable	not applicable	not entered	not entered	not entered	not entered	not entered	not entered	not entered	not entered	urban biome	anthropogenic environmental material	food product	misc environment	not applicable	not entered	not entered	not entered	not entered	not entered	not entered	not entered	not entered	not entered	not applicable	not applicable	not entered	host-associated	not applicable	not applicable	no	not applicable	not entered	not entered	not entered	not entered	not entered
AMZ_46_RE7_01_48979.mzXML	AMZ_46	Plantain	simple	food	land	plant	fruit	fleshy fruit	berry	plantain	plantain	not applicable	not applicable	not applicable	not entered	not entered	not entered	not entered	not entered	not entered	not entered	not entered	urban biome	anthropogenic environmental material	food product	misc environment	not applicable	not entered	not entered	not entered	not entered	not entered	not entered	not entered	not entered	not entered	not applicable	not applicable	not entered	host-associated	plant	plant-corpus	no	not applicable	not entered	not entered	not entered	not entered	not entered
AMZ_47_RE8_01_48969.mzXML	AMZ_47	Tequeos with cheese	complex	food	land	complex	complex	complex	complex	complex	complex	not applicable	not applicable	not applicable	not entered	not entered	not entered	not entered	not entered	not entered	not entered	not entered	urban biome	anthropogenic environmental material	food product	misc environment	not applicable	not entered	not entered	not entered	not entered	not entered	not entered	not entered	not entered	not entered	not applicable	not applicable	not entered	host-associated	not applicable	not applicable	yes	not applicable	not entered	not entered	not entered	not entered	not entered
AMZ_48_RE9_01_49035.mzXML	AMZ_48	Meat empanada	complex	food	land	complex	complex	complex	complex	complex	complex	not applicable	not applicable	not applicable	not entered	not entered	not entered	not entered	not entered	not entered	not entered	not entered	urban biome	anthropogenic environmental material	food product	misc environment	not applicable	not entered	not entered	not entered	not entered	not entered	not entered	not entered	not entered	not entered	not applicable	not applicable	not entered	host-associated	not applicable	not applicable	no	not applicable	not entered	not entered	not entered	not entered	not entered
AMZ_49_RE10_01_48988.mzXML	AMZ_49	Sweted meat empanada	complex	food	land	complex	complex	complex	complex	complex	complex	not applicable	not applicable	not applicable	not entered	not entered	not entered	not entered	not entered	not entered	not entered	not entered	urban biome	anthropogenic environmental material	food product	misc environment	not applicable	not entered	not entered	not entered	not entered	not entered	not entered	not entered	not entered	not entered	not applicable	not applicable	not entered	host-associated	not applicable	not applicable	no	not applicable	not entered	not entered	not entered	not entered	not entered
AMZ_5_RA6_01_48889.mzXML	AMZ_05	Toasted bread with butter	complex	food	land	complex	complex	complex	complex	complex	complex	not applicable	not applicable	not applicable	not entered	not entered	not entered	not entered	not entered	not entered	not entered	not entered	urban biome	anthropogenic environmental material	food product	misc environment	not applicable	not entered	not entered	not entered	not entered	not entered	not entered	not entered	not entered	not entered	not applicable	not applicable	not entered	host-associated	not applicable	not applicable	yes	not applicable	not entered	not entered	not entered	not entered	not entered
AMZ_50_RE11_01_48989.mzXML	AMZ_50	Chicken empanada	complex	food	land	complex	complex	complex	complex	complex	complex	not applicable	not applicable	not applicable	not entered	not entered	not entered	not entered	not entered	not entered	not entered	not entered	urban biome	anthropogenic environmental material	food product	misc environment	not applicable	not entered	not entered	not entered	not entered	not entered	not entered	not entered	not entered	not entered	not applicable	not applicable	not entered	host-associated	not applicable	not applicable	no	not applicable	not entered	not entered	not entered	not entered	not entered
AMZ_6_RA7_01_48891.mzXML	AMZ_06	Stewed chicken	complex	food	land	complex	complex	complex	complex	complex	complex	not applicable	not applicable	not applicable	not entered	not entered	not entered	not entered	not entered	not entered	not entered	not entered	urban biome	anthropogenic environmental material	food product	misc environment	not applicable	not entered	not entered	not entered	not entered	not entered	not entered	not entered	not entered	not entered	not applicable	not applicable	not entered	host-associated	not applicable	not applicable	no	not applicable	not entered	not entered	not entered	not entered	not entered
AMZ_7_RA8_01_48895.mzXML	AMZ_07	Plantain with butter and sugar	complex	food	land	complex	complex	complex	complex	complex	complex	not applicable	not applicable	not applicable	not entered	not entered	not entered	not entered	not entered	not entered	not entered	not entered	urban biome	anthropogenic environmental material	food product	misc environment	not applicable	not entered	not entered	not entered	not entered	not entered	not entered	not entered	not entered	not entered	not applicable	not applicable	not entered	host-associated	not applicable	not applicable	no	not applicable	not entered	not entered	not entered	not entered	not entered
AMZ_8_RA9_01_48899.mzXML	AMZ_08	White rice	complex	food	land	plant	complex	complex	complex	complex	complex	not applicable	not applicable	not applicable	not entered	not entered	not entered	not entered	not entered	not entered	not entered	not entered	urban biome	anthropogenic environmental material	food product	misc environment	not applicable	not entered	not entered	not entered	not entered	not entered	not entered	not entered	not entered	not entered	not applicable	not applicable	not entered	host-associated	not applicable	not applicable	no	not applicable	not entered	not entered	not entered	not entered	not entered
AMZ_9_RA10_01_49007.mzXML	AMZ_09	Toasted bread with butter and turkey ham	complex	food	land	complex	complex	complex	complex	complex	complex	not applicable	not applicable	not applicable	not entered	not entered	not entered	not entered	not entered	not entered	not entered	not entered	urban biome	anthropogenic environmental material	food product	misc environment	not applicable	not entered	not entered	not entered	not entered	not entered	not entered	not entered	not entered	not entered	not applicable	not applicable	not entered	host-associated	not applicable	not applicable	yes	not applicable	not entered	not entered	not entered	not entered	not entered
cw 36 61. skin_1x_RE12_01_21691.mzXML	CW36_G1_skin	Granny Smith	simple	food	land	plant	fruit	fleshy fruit	pome	apple	apple	alcoholic	non-carbonated	cider	not entered	Malus	Malus sp.	fruit	Rosaceae	2016-09-27 11:00:00	TRUE	1122	orchard biome	agricultural feature	plant fruit food product	plant-associated	0	USA:CA:Julian	Malus domestica	1457994	33.0938	-116.645	food metagenome	Peacefield Orchard	870726	Cider Fermentation	Granny Smith	A	apple skin	host-associated	plant	plant-corpus	yes	not entered	not entered	no	not applicable	not applicable	not applicable
CW_100.S_R1.T10_BG8_01_13165.mzXML	CW100_S_R1_T10	Ribston Pippen	simple	food	land	plant	fruit	fleshy fruit	pome	apple_cider	apple_cider	alcoholic	non-carbonated	cider	not entered	Malus	Malus sp.	fruit	Rosaceae	2016-11-11 11:01:00	TRUE	1123	orchard biome	agricultural feature	particulate material from skin	misc environment	18	USA:CA:Julian	Malus domestica	1457995	33.0666	-116.592	food fermentation metagenome	Limon Orchard	1154581	Cider Fermentation	Ribston Pippen	A	fermenting apple juice	host-associated	plant	plant-corpus	yes	not entered	not entered	no	not applicable	not applicable	not applicable
CW_101.S_R2.T10_BG9_01_13166.mzXML	CW101_S_R2_T10	Ribston Pippen	simple	food	land	plant	fruit	fleshy fruit	pome	apple_cider	apple_cider	alcoholic	non-carbonated	cider	not entered	Malus	Malus sp.	fruit	Rosaceae	2016-11-11 11:00:00	TRUE	1122	orchard biome	agricultural feature	particulate material from skin	misc environment	18	USA:CA:Julian	Malus domestica	1457994	33.0666	-116.592	food fermentation metagenome	Limon Orchard	1154581	Cider Fermentation	Ribston Pippen	B	fermenting apple juice	host-associated	plant	plant-corpus	yes	not entered	not entered	no	not applicable	not applicable	not applicable
CW_102.S_R3.T10_BG10_01_13167.mzXML	CW102_S_R3_T10	Ribston Pippen	simple	food	land	plant	fruit	fleshy fruit	pome	apple_cider	apple_cider	alcoholic	non-carbonated	cider	not entered	Malus	Malus sp.	fruit	Rosaceae	2016-11-11 11:00:00	TRUE	1122	orchard biome	agricultural feature	particulate material from skin	misc environment	18	USA:CA:Julian	Malus domestica	1457994	33.0666	-116.592	food fermentation metagenome	Limon Orchard	1154581	Cider Fermentation	Ribston Pippen	C	fermenting apple juice	host-associated	plant	plant-corpus	yes	not entered	not entered	no	not applicable	not applicable	not applicable
CW_103.S_R1.T11_BG11_01_13168.mzXML	CW103_S_R1_T11	Ribston Pippen	simple	food	land	plant	fruit	fleshy fruit	pome	apple_cider	apple_cider	alcoholic	non-carbonated	cider	not entered	Malus	Malus sp.	fruit	Rosaceae	2016-11-14 11:00:00	TRUE	1122	orchard biome	agricultural feature	particulate material from skin	misc environment	21	USA:CA:Julian	Malus domestica	1457994	33.0666	-116.592	food fermentation metagenome	Limon Orchard	1154581	Cider Fermentation	Ribston Pippen	A	fermenting apple juice	host-associated	plant	plant-corpus	yes	not entered	not entered	no	not applicable	not applicable	not applicable
CW_104.S_R2.T11_BG12_01_13169.mzXML	CW104_S_R2_T11	Ribston Pippen	simple	food	land	plant	fruit	fleshy fruit	pome	apple_cider	apple_cider	alcoholic	non-carbonated	cider	not entered	Malus	Malus sp.	fruit	Rosaceae	2016-11-14 11:00:00	TRUE	1122	orchard biome	agricultural feature	particulate material from skin	misc environment	21	USA:CA:Julian	Malus domestica	1457994	33.0666	-116.592	food fermentation metagenome	Limon Orchard	1154581	Cider Fermentation	Ribston Pippen	B	fermenting apple juice	host-associated	plant	plant-corpus	yes	not entered	not entered	no	not applicable	not applicable	not applicable
CW_105.S_R3.T11_BH2_01_13171.mzXML	CW105_S_R3_T11	Ribston Pippen	simple	food	land	plant	fruit	fleshy fruit	pome	apple_cider	apple_cider	alcoholic	non-carbonated	cider	not entered	Malus	Malus sp.	fruit	Rosaceae	2016-11-14 11:00:00	TRUE	1122	orchard biome	agricultural feature	particulate material from skin	misc environment	21	USA:CA:Julian	Malus domestica	1457994	33.0666	-116.592	food fermentation metagenome	Limon Orchard	1154581	Cider Fermentation	Ribston Pippen	C	fermenting apple juice	host-associated	plant	plant-corpus	yes	not entered	not entered	no	not applicable	not applicable	not applicable
CW_106.S_R1.T12_BH3_01_13172.mzXML	CW106_S_R1_T12	Ribston Pippen	simple	food	land	plant	fruit	fleshy fruit	pome	apple_cider	apple_cider	alcoholic	non-carbonated	cider	not entered	Malus	Malus sp.	fruit	Rosaceae	2016-11-26 11:00:00	TRUE	1122	orchard biome	agricultural feature	particulate material from skin	plant-associated	33	USA:CA:Julian	Malus domestica	1457994	33.0666	-116.592	food fermentation metagenome	Limon Orchard	1154581	Cider Fermentation	Ribston Pippen	D	fermenting apple juice	host-associated	plant	plant-corpus	yes	not entered	not entered	no	not applicable	not applicable	not applicable
CW_107.S_R1.T13_BH4_01_13173.mzXML	CW107_S_R1_T13	Ribston Pippen	simple	food	land	plant	fruit	fleshy fruit	pome	apple_cider	apple_cider	alcoholic	non-carbonated	cider	not entered	Malus	Malus sp.	fruit	Rosaceae	2016-12-16 11:00:00	TRUE	1122	orchard biome	agricultural feature	particulate material from skin	misc environment	60	USA:CA:Julian	Malus domestica	1457994	33.0666	-116.592	food fermentation metagenome	Limon Orchard	1154581	Cider Fermentation	Ribston Pippen	D	fermenting apple juice	host-associated	plant	plant-corpus	yes	not entered	not entered	no	not applicable	not applicable	not applicable
CW_108.S_R1.T14_BH5_01_13174.mzXML	CW108_S_R1_T14	Ribston Pippen	simple	food	land	plant	fruit	fleshy fruit	pome	apple_cider	apple_cider	alcoholic	non-carbonated	cider	not entered	Malus	Malus sp.	fruit	Rosaceae	2016-12-23 11:00:00	TRUE	1122	orchard biome	agricultural feature	particulate material from skin	misc environment	90	USA:CA:Julian	Malus domestica	1457994	33.0666	-116.592	food fermentation metagenome	Limon Orchard	1154581	Cider Fermentation	Ribston Pippen	D	fermenting apple juice	host-associated	plant	plant-corpus	yes	not entered	not entered	no	not applicable	not applicable	not applicable
CW_110.S_F1.T0_BH6_01_13175.mzXML	CW110_S_F1_T0	Fuji	simple	food	land	plant	fruit	fleshy fruit	pome	apple	apple	non-alcoholic	non-carbonated	juice	not entered	Malus	Malus pumila	fruit	Rosaceae	2016-10-24 11:00:00	TRUE	1122	orchard biome	agricultural feature	particulate material from skin	misc environment	0	USA:CA:Julian	Malus domestica	1457994	33.0666	-116.592	food metagenome	Limon Orchard	870726	Cider Fermentation	Fuji	A	apple juice	host-associated	plant	plant-corpus	no	not entered	not entered	no	not applicable	not applicable	not applicable
CW_111.S_F1.T1_BH7_01_13176.mzXML	CW111_S_F1_T1	Fuji	simple	food	land	plant	fruit	fleshy fruit	pome	apple_cider	apple_cider	not applicable	non-carbonated	cider	not entered	Malus	Malus pumila	fruit	Rosaceae	2016-10-25 11:00:00	TRUE	1122	orchard biome	agricultural feature	particulate material from skin	misc environment	1	USA:CA:Julian	Malus domestica	1457994	33.0666	-116.592	food fermentation metagenome	Limon Orchard	1154581	Cider Fermentation	Fuji	A	fermenting apple juice	host-associated	plant	plant-corpus	no	not entered	not entered	no	not applicable	not applicable	not applicable
CW_112.S_F2.T1_BH8_01_13177.mzXML	CW112_S_F2_T1	Fuji	simple	food	land	plant	fruit	fleshy fruit	pome	apple_cider	apple_cider	not applicable	non-carbonated	cider	not entered	Malus	Malus pumila	fruit	Rosaceae	2016-10-25 11:00:00	TRUE	1122	orchard biome	agricultural feature	particulate material from skin	misc environment	1	USA:CA:Julian	Malus domestica	1457994	33.0666	-116.592	food fermentation metagenome	Limon Orchard	1154581	Cider Fermentation	Fuji	B	fermenting apple juice	host-associated	plant	plant-corpus	no	not entered	not entered	no	not applicable	not applicable	not applicable
CW_113.S_F3.T1_BH9_01_13178.mzXML	CW113_S_F3_T1	Fuji	simple	food	land	plant	fruit	fleshy fruit	pome	apple_cider	apple_cider	alcoholic	non-carbonated	cider	not entered	Malus	Malus pumila	fruit	Rosaceae	2016-10-25 11:00:00	TRUE	1122	orchard biome	agricultural feature	particulate material from skin	misc environment	1	USA:CA:Julian	Malus domestica	1457994	33.0666	-116.592	food fermentation metagenome	Limon Orchard	1154581	Cider Fermentation	Fuji	C	fermenting apple juice	host-associated	plant	plant-corpus	yes	not entered	not entered	no	not applicable	not applicable	not applicable
CW_114.S_F1.T2_BH10_01_13179.mzXML	CW114_S_F1_T2	Fuji	simple	food	land	plant	fruit	fleshy fruit	pome	apple_cider	apple_cider	alcoholic	non-carbonated	cider	not entered	Malus	Malus pumila	fruit	Rosaceae	2016-10-26 11:00:00	TRUE	1122	orchard biome	agricultural feature	particulate material from skin	misc environment	2	USA:CA:Julian	Malus domestica	1457994	33.0666	-116.592	food fermentation metagenome	Limon Orchard	1154581	Cider Fermentation	Fuji	A	fermenting apple juice	host-associated	plant	plant-corpus	yes	not entered	not entered	no	not applicable	not applicable	not applicable
CW_115.S_F2.T2_BH11_01_13180.mzXML	CW115_S_F2_T2	Fuji	simple	food	land	plant	fruit	fleshy fruit	pome	apple_cider	apple_cider	alcoholic	non-carbonated	cider	not entered	Malus	Malus pumila	fruit	Rosaceae	2016-10-26 11:00:00	TRUE	1122	orchard biome	agricultural feature	particulate material from skin	misc environment	2	USA:CA:Julian	Malus domestica	1457994	33.0666	-116.592	food fermentation metagenome	Limon Orchard	1154581	Cider Fermentation	Fuji	B	fermenting apple juice	host-associated	plant	plant-corpus	yes	not entered	not entered	no	not applicable	not applicable	not applicable
CW_116.S_F3.T2_BH12_01_13181.mzXML	CW116_S_F3_T2	Fuji	simple	food	land	plant	fruit	fleshy fruit	pome	apple_cider	apple_cider	alcoholic	non-carbonated	cider	not entered	Malus	Malus pumila	fruit	Rosaceae	2016-10-26 11:00:00	TRUE	1122	orchard biome	agricultural feature	particulate material from skin	misc environment	2	USA:CA:Julian	Malus domestica	1457994	33.0666	-116.592	food fermentation metagenome	Limon Orchard	1154581	Cider Fermentation	Fuji	C	fermenting apple juice	host-associated	plant	plant-corpus	yes	not entered	not entered	no	not applicable	not applicable	not applicable
CW_117.S_F1.T3_RA2_01_13183.mzXML	CW117_S_F1_T3	Fuji	simple	food	land	plant	fruit	fleshy fruit	pome	apple_cider	apple_cider	alcoholic	non-carbonated	cider	not entered	Malus	Malus pumila	fruit	Rosaceae	2016-10-27 11:00:00	TRUE	1122	orchard biome	agricultural feature	particulate material from skin	misc environment	3	USA:CA:Julian	Malus domestica	1457994	33.0666	-116.592	food fermentation metagenome	Limon Orchard	1154581	Cider Fermentation	Fuji	A	fermenting apple juice	host-associated	plant	plant-corpus	yes	not entered	not entered	no	not applicable	not applicable	not applicable
CW_118.S_F2.T3_RA3_01_13184.mzXML	CW118_S_F2_T3	Fuji	simple	food	land	plant	fruit	fleshy fruit	pome	apple_cider	apple_cider	alcoholic	non-carbonated	cider	not entered	Malus	Malus pumila	fruit	Rosaceae	2016-10-27 11:00:00	TRUE	1122	orchard biome	agricultural feature	particulate material from skin	misc environment	3	USA:CA:Julian	Malus domestica	1457994	33.0666	-116.592	food fermentation metagenome	Limon Orchard	1154581	Cider Fermentation	Fuji	B	fermenting apple juice	host-associated	plant	plant-corpus	yes	not entered	not entered	no	not applicable	not applicable	not applicable
CW_119.S_F3.T3_RA4_01_13185.mzXML	CW119_S_F3_T3	Fuji	simple	food	land	plant	fruit	fleshy fruit	pome	apple_cider	apple_cider	alcoholic	non-carbonated	cider	not entered	Malus	Malus pumila	fruit	Rosaceae	2016-10-27 11:00:00	TRUE	1122	orchard biome	agricultural feature	particulate material from skin	misc environment	3	USA:CA:Julian	Malus domestica	1457994	33.0666	-116.592	food fermentation metagenome	Limon Orchard	1154581	Cider Fermentation	Fuji	C	fermenting apple juice	host-associated	plant	plant-corpus	yes	not entered	not entered	no	not applicable	not applicable	not applicable
CW_120.S_F1.T4_RA5_01_13186.mzXML	CW120_S_F1_T4	Fuji	simple	food	land	plant	fruit	fleshy fruit	pome	apple_cider	apple_cider	alcoholic	non-carbonated	cider	not entered	Malus	Malus pumila	fruit	Rosaceae	2016-10-28 11:00:00	TRUE	1122	orchard biome	agricultural feature	particulate material from skin	misc environment	4	USA:CA:Julian	Malus domestica	1457994	33.0666	-116.592	food fermentation metagenome	Limon Orchard	1154581	Cider Fermentation	Fuji	A	fermenting apple juice	host-associated	plant	plant-corpus	yes	not entered	not entered	no	not applicable	not applicable	not applicable
CW_121.S_F2.T4_RA6_01_13187.mzXML	CW121_S_F2_T4	Fuji	simple	food	land	plant	fruit	fleshy fruit	pome	apple_cider	apple_cider	alcoholic	non-carbonated	cider	not entered	Malus	Malus pumila	fruit	Rosaceae	2016-10-28 11:00:00	TRUE	1122	orchard biome	agricultural feature	particulate material from skin	misc environment	4	USA:CA:Julian	Malus domestica	1457994	33.0666	-116.592	food fermentation metagenome	Limon Orchard	1154581	Cider Fermentation	Fuji	B	fermenting apple juice	host-associated	plant	plant-corpus	yes	not entered	not entered	no	not applicable	not applicable	not applicable
CW_122.S_F3.T4_RA7_01_13188.mzXML	CW122_S_F3_T4	Fuji	simple	food	land	plant	fruit	fleshy fruit	pome	apple_cider	apple_cider	alcoholic	non-carbonated	cider	not entered	Malus	Malus pumila	fruit	Rosaceae	2016-10-28 11:00:00	TRUE	1122	orchard biome	agricultural feature	particulate material from skin	misc environment	4	USA:CA:Julian	Malus domestica	1457994	33.0666	-116.592	food fermentation metagenome	Limon Orchard	1154581	Cider Fermentation	Fuji	C	fermenting apple juice	host-associated	plant	plant-corpus	yes	not entered	not entered	no	not applicable	not applicable	not applicable
CW_123.S_F1.T5_RA8_01_13189.mzXML	CW123_S_F1_T5	Fuji	simple	food	land	plant	fruit	fleshy fruit	pome	apple_cider	apple_cider	alcoholic	non-carbonated	cider	not entered	Malus	Malus pumila	fruit	Rosaceae	2016-10-30 11:00:00	TRUE	1122	orchard biome	agricultural feature	particulate material from skin	misc environment	6	USA:CA:Julian	Malus domestica	1457994	33.0666	-116.592	food fermentation metagenome	Limon Orchard	1154581	Cider Fermentation	Fuji	A	fermenting apple juice	host-associated	plant	plant-corpus	yes	not entered	not entered	no	not applicable	not applicable	not applicable
CW_124.S_F2.T5_RA9_01_13190.mzXML	CW124_S_F2_T5	Fuji	simple	food	land	plant	fruit	fleshy fruit	pome	apple_cider	apple_cider	alcoholic	non-carbonated	cider	not entered	Malus	Malus pumila	fruit	Rosaceae	2016-10-30 11:00:00	TRUE	1122	orchard biome	agricultural feature	particulate material from skin	misc environment	6	USA:CA:Julian	Malus domestica	1457994	33.0666	-116.592	food fermentation metagenome	Limon Orchard	1154581	Cider Fermentation	Fuji	B	fermenting apple juice	host-associated	plant	plant-corpus	yes	not entered	not entered	no	not applicable	not applicable	not applicable
CW_125.S_F3.T5_RA10_01_13191.mzXML	CW125_S_F3_T5	Fuji	simple	food	land	plant	fruit	fleshy fruit	pome	apple_cider	apple_cider	alcoholic	non-carbonated	cider	not entered	Malus	Malus pumila	fruit	Rosaceae	2016-10-30 11:00:00	TRUE	1122	orchard biome	agricultural feature	particulate material from skin	misc environment	6	USA:CA:Julian	Malus domestica	1457994	33.0666	-116.592	food fermentation metagenome	Limon Orchard	1154581	Cider Fermentation	Fuji	C	fermenting apple juice	host-associated	plant	plant-corpus	yes	not entered	not entered	no	not applicable	not applicable	not applicable
CW_126.S_F1.T6_RA11_01_13192.mzXML	CW126_S_F1_T6	Fuji	simple	food	land	plant	fruit	fleshy fruit	pome	apple_cider	apple_cider	alcoholic	non-carbonated	cider	not entered	Malus	Malus pumila	fruit	Rosaceae	2016-11-01 11:00:00	TRUE	1122	orchard biome	agricultural feature	particulate material from skin	misc environment	8	USA:CA:Julian	Malus domestica	1457994	33.0666	-116.592	food fermentation metagenome	Limon Orchard	1154581	Cider Fermentation	Fuji	A	fermenting apple juice	host-associated	plant	plant-corpus	yes	not entered	not entered	no	not applicable	not applicable	not applicable
CW_127.S_F2.T6_RA12_01_13193.mzXML	CW127_S_F2_T6	Fuji	simple	food	land	plant	fruit	fleshy fruit	pome	apple_cider	apple_cider	alcoholic	non-carbonated	cider	not entered	Malus	Malus pumila	fruit	Rosaceae	2016-11-01 11:00:00	TRUE	1122	orchard biome	agricultural feature	particulate material from skin	misc environment	8	USA:CA:Julian	Malus domestica	1457994	33.0666	-116.592	food fermentation metagenome	Limon Orchard	1154581	Cider Fermentation	Fuji	B	fermenting apple juice	host-associated	plant	plant-corpus	yes	not entered	not entered	no	not applicable	not applicable	not applicable
CW_128.S_F3.T6_RB2_01_13201.mzXML	CW128_S_F3_T6	Fuji	simple	food	land	plant	fruit	fleshy fruit	pome	apple_cider	apple_cider	alcoholic	non-carbonated	cider	not entered	Malus	Malus pumila	fruit	Rosaceae	2016-11-01 11:00:00	TRUE	1122	orchard biome	agricultural feature	particulate material from skin	misc environment	8	USA:CA:Julian	Malus domestica	1457994	33.0666	-116.592	food fermentation metagenome	Limon Orchard	1154581	Cider Fermentation	Fuji	C	fermenting apple juice	host-associated	plant	plant-corpus	yes	not entered	not entered	no	not applicable	not applicable	not applicable
CW_129.S_F1.T7_RB3_01_13202.mzXML	CW129_S_F1_T7	Fuji	simple	food	land	plant	fruit	fleshy fruit	pome	apple_cider	apple_cider	alcoholic	non-carbonated	cider	not entered	Malus	Malus pumila	fruit	Rosaceae	2016-11-03 11:00:00	TRUE	1122	orchard biome	agricultural feature	particulate material from skin	misc environment	10	USA:CA:Julian	Malus domestica	1457994	33.0666	-116.592	food fermentation metagenome	Limon Orchard	1154581	Cider Fermentation	Fuji	A	fermenting apple juice	host-associated	plant	plant-corpus	yes	not entered	not entered	no	not applicable	not applicable	not applicable
CW_130.S_F2.T7_RB4_01_13203.mzXML	CW130_S_F2_T7	Fuji	simple	food	land	plant	fruit	fleshy fruit	pome	apple_cider	apple_cider	alcoholic	non-carbonated	cider	not entered	Malus	Malus pumila	fruit	Rosaceae	2016-11-03 11:00:00	TRUE	1122	orchard biome	agricultural feature	particulate material from skin	misc environment	10	USA:CA:Julian	Malus domestica	1457994	33.0666	-116.592	food fermentation metagenome	Limon Orchard	1154581	Cider Fermentation	Fuji	B	fermenting apple juice	host-associated	plant	plant-corpus	yes	not entered	not entered	no	not applicable	not applicable	not applicable
CW_131.S_F3.T7_RB5_01_13204.mzXML	CW131_S_F3_T7	Fuji	simple	food	land	plant	fruit	fleshy fruit	pome	apple_cider	apple_cider	alcoholic	non-carbonated	cider	not entered	Malus	Malus pumila	fruit	Rosaceae	2016-11-03 11:00:00	TRUE	1122	orchard biome	agricultural feature	particulate material from skin	misc environment	10	USA:CA:Julian	Malus domestica	1457994	33.0666	-116.592	food fermentation metagenome	Limon Orchard	1154581	Cider Fermentation	Fuji	C	fermenting apple juice	host-associated	plant	plant-corpus	yes	not entered	not entered	no	not applicable	not applicable	not applicable
CW_132.S_F1.T8_RB6_01_13205.mzXML	CW132_S_F1_T8	Fuji	simple	food	land	plant	fruit	fleshy fruit	pome	apple_cider	apple_cider	alcoholic	non-carbonated	cider	not entered	Malus	Malus pumila	fruit	Rosaceae	2016-11-05 11:00:00	TRUE	1122	orchard biome	agricultural feature	particulate material from skin	misc environment	12	USA:CA:Julian	Malus domestica	1457994	33.0666	-116.592	food fermentation metagenome	Limon Orchard	1154581	Cider Fermentation	Fuji	A	fermenting apple juice	host-associated	plant	plant-corpus	yes	not entered	not entered	no	not applicable	not applicable	not applicable
CW_133.S_F2.T8_RB7_01_13206.mzXML	CW133_S_F2_T8	Fuji	simple	food	land	plant	fruit	fleshy fruit	pome	apple_cider	apple_cider	alcoholic	non-carbonated	cider	not entered	Malus	Malus pumila	fruit	Rosaceae	2016-11-05 11:00:00	TRUE	1122	orchard biome	agricultural feature	particulate material from skin	misc environment	12	USA:CA:Julian	Malus domestica	1457994	33.0666	-116.592	food fermentation metagenome	Limon Orchard	1154581	Cider Fermentation	Fuji	B	fermenting apple juice	host-associated	plant	plant-corpus	yes	not entered	not entered	no	not applicable	not applicable	not applicable
CW_134.S_F3.T8_RB8_01_13207.mzXML	CW134_S_F3_T8	Fuji	simple	food	land	plant	fruit	fleshy fruit	pome	apple_cider	apple_cider	alcoholic	non-carbonated	cider	not entered	Malus	Malus pumila	fruit	Rosaceae	2016-11-05 11:00:00	TRUE	1122	orchard biome	agricultural feature	particulate material from skin	misc environment	12	USA:CA:Julian	Malus domestica	1457994	33.0666	-116.592	food fermentation metagenome	Limon Orchard	1154581	Cider Fermentation	Fuji	C	fermenting apple juice	host-associated	plant	plant-corpus	yes	not entered	not entered	no	not applicable	not applicable	not applicable
CW_135.S_F1.T9_RB9_01_13208.mzXML	CW135_S_F1_T9	Fuji	simple	food	land	plant	fruit	fleshy fruit	pome	apple_cider	apple_cider	alcoholic	non-carbonated	cider	not entered	Malus	Malus pumila	fruit	Rosaceae	2016-11-08 11:00:00	TRUE	1122	orchard biome	agricultural feature	particulate material from skin	misc environment	15	USA:CA:Julian	Malus domestica	1457994	33.0666	-116.592	food fermentation metagenome	Limon Orchard	1154581	Cider Fermentation	Fuji	A	fermenting apple juice	host-associated	plant	plant-corpus	yes	not entered	not entered	no	not applicable	not applicable	not applicable
CW_136.S_F2.T9_RB10_01_13209.mzXML	CW136_S_F2_T9	Fuji	simple	food	land	plant	fruit	fleshy fruit	pome	apple_cider	apple_cider	alcoholic	non-carbonated	cider	not entered	Malus	Malus pumila	fruit	Rosaceae	2016-11-08 11:00:00	TRUE	1122	orchard biome	agricultural feature	particulate material from skin	misc environment	15	USA:CA:Julian	Malus domestica	1457994	33.0666	-116.592	food fermentation metagenome	Limon Orchard	1154581	Cider Fermentation	Fuji	B	fermenting apple juice	host-associated	plant	plant-corpus	yes	not entered	not entered	no	not applicable	not applicable	not applicable
CW_137.S_F3.T9_RB11_01_13210.mzXML	CW137_S_F3_T9	Fuji	simple	food	land	plant	fruit	fleshy fruit	pome	apple_cider	apple_cider	alcoholic	non-carbonated	cider	not entered	Malus	Malus pumila	fruit	Rosaceae	2016-11-08 11:00:00	TRUE	1122	orchard biome	agricultural feature	particulate material from skin	misc environment	15	USA:CA:Julian	Malus domestica	1457994	33.0666	-116.592	food fermentation metagenome	Limon Orchard	1154581	Cider Fermentation	Fuji	C	fermenting apple juice	host-associated	plant	plant-corpus	yes	not entered	not entered	no	not applicable	not applicable	not applicable
CW_138.S_F1.T10_RB12_01_13211.mzXML	CW138_S_F1_T10	Fuji	simple	food	land	plant	fruit	fleshy fruit	pome	apple_cider	apple_cider	alcoholic	non-carbonated	cider	not entered	Malus	Malus pumila	fruit	Rosaceae	2016-11-11 11:00:00	TRUE	1122	orchard biome	agricultural feature	particulate material from skin	misc environment	18	USA:CA:Julian	Malus domestica	1457994	33.0666	-116.592	food fermentation metagenome	Limon Orchard	1154581	Cider Fermentation	Fuji	A	fermenting apple juice	host-associated	plant	plant-corpus	yes	not entered	not entered	no	not applicable	not applicable	not applicable
CW_139.S_F2.T10_RC2_01_13213.mzXML	CW139_S_F2_T10	Fuji	simple	food	land	plant	fruit	fleshy fruit	pome	apple_cider	apple_cider	alcoholic	non-carbonated	cider	not entered	Malus	Malus pumila	fruit	Rosaceae	2016-11-11 11:00:00	TRUE	1122	orchard biome	agricultural feature	particulate material from skin	misc environment	18	USA:CA:Julian	Malus domestica	1457994	33.0666	-116.592	food fermentation metagenome	Limon Orchard	1154581	Cider Fermentation	Fuji	B	fermenting apple juice	host-associated	plant	plant-corpus	yes	not entered	not entered	no	not applicable	not applicable	not applicable
CW_140.S_F3.T10_RC3_01_13214.mzXML	CW140_S_F3_T10	Fuji	simple	food	land	plant	fruit	fleshy fruit	pome	apple_cider	apple_cider	alcoholic	non-carbonated	cider	not entered	Malus	Malus pumila	fruit	Rosaceae	2016-11-11 11:00:00	TRUE	1122	orchard biome	agricultural feature	particulate material from skin	misc environment	18	USA:CA:Julian	Malus domestica	1457994	33.0666	-116.592	food fermentation metagenome	Limon Orchard	1154581	Cider Fermentation	Fuji	C	fermenting apple juice	host-associated	plant	plant-corpus	yes	not entered	not entered	no	not applicable	not applicable	not applicable
CW_141.S_F1.T11_RC4_01_13215.mzXML	CW141_S_F1_T11	Fuji	simple	food	land	plant	fruit	fleshy fruit	pome	apple_cider	apple_cider	alcoholic	non-carbonated	cider	not entered	Malus	Malus pumila	fruit	Rosaceae	2016-11-14 11:00:00	TRUE	1122	orchard biome	agricultural feature	particulate material from skin	misc environment	21	USA:CA:Julian	Malus domestica	1457994	33.0666	-116.592	food fermentation metagenome	Limon Orchard	1154581	Cider Fermentation	Fuji	A	fermenting apple juice	host-associated	plant	plant-corpus	yes	not entered	not entered	no	not applicable	not applicable	not applicable
CW_142.S_F2.T11_RC5_01_13216.mzXML	CW142_S_F2_T11	Fuji	simple	food	land	plant	fruit	fleshy fruit	pome	apple_cider	apple_cider	alcoholic	non-carbonated	cider	not entered	Malus	Malus pumila	fruit	Rosaceae	2016-11-14 11:00:00	TRUE	1122	orchard biome	agricultural feature	particulate material from skin	misc environment	21	USA:CA:Julian	Malus domestica	1457994	33.0666	-116.592	food fermentation metagenome	Limon Orchard	1154581	Cider Fermentation	Fuji	B	fermenting apple juice	host-associated	plant	plant-corpus	yes	not entered	not entered	no	not applicable	not applicable	not applicable
CW_143.S_F3.T11_RC6_01_13217.mzXML	CW143_S_F3_T11	Fuji	simple	food	land	plant	fruit	fleshy fruit	pome	apple_cider	apple_cider	alcoholic	non-carbonated	cider	not entered	Malus	Malus pumila	fruit	Rosaceae	2016-11-14 11:00:00	TRUE	1122	orchard biome	agricultural feature	particulate material from skin	misc environment	21	USA:CA:Julian	Malus domestica	1457994	33.0666	-116.592	food fermentation metagenome	Limon Orchard	1154581	Cider Fermentation	Fuji	C	fermenting apple juice	host-associated	plant	plant-corpus	yes	not entered	not entered	no	not applicable	not applicable	not applicable
CW_144.S_F1.T12_RC7_01_13218.mzXML	CW144_S_F1_T12	Fuji	simple	food	land	plant	fruit	fleshy fruit	pome	apple_cider	apple_cider	alcoholic	non-carbonated	cider	not entered	Malus	Malus pumila	fruit	Rosaceae	2016-11-26 11:00:00	TRUE	1122	orchard biome	agricultural feature	particulate material from skin	plant-associated	33	USA:CA:Julian	Malus domestica	1457994	33.0666	-116.592	food fermentation metagenome	Limon Orchard	1154581	Cider Fermentation	Fuji	D	fermenting apple juice	host-associated	plant	plant-corpus	yes	not entered	not entered	no	not applicable	not applicable	not applicable
CW_145.S_F1.T13_RC8_01_13219.mzXML	CW145_S_F1_T13	Fuji	simple	food	land	plant	fruit	fleshy fruit	pome	apple_cider	apple_cider	alcoholic	non-carbonated	cider	not entered	Malus	Malus pumila	fruit	Rosaceae	2016-12-16 11:00:00	TRUE	1122	orchard biome	agricultural feature	particulate material from skin	misc environment	60	USA:CA:Julian	Malus domestica	1457994	33.0666	-116.592	food fermentation metagenome	Limon Orchard	1154581	Cider Fermentation	Fuji	D	fermenting apple juice	host-associated	plant	plant-corpus	yes	not entered	not entered	no	not applicable	not applicable	not applicable
CW_146.S_F1.T14_RC9_01_13220.mzXML	CW146_S_F1_T14	Fuji	simple	food	land	plant	fruit	fleshy fruit	pome	apple_cider	apple_cider	alcoholic	non-carbonated	cider	not entered	Malus	Malus pumila	fruit	Rosaceae	2016-12-23 11:00:00	TRUE	1122	orchard biome	agricultural feature	particulate material from skin	misc environment	90	USA:CA:Julian	Malus domestica	1457994	33.0666	-116.592	food fermentation metagenome	Limon Orchard	1154581	Cider Fermentation	Fuji	D	fermenting apple juice	host-associated	plant	plant-corpus	yes	not entered	not entered	no	not applicable	not applicable	not applicable
CW_18.S_P1.T6_BA9_01_13094.mzXML	CW18_P1_T6	Newtown Pippen	simple	food	land	plant	fruit	fleshy fruit	pome	apple_cider	apple_cider	alcoholic	non-carbonated	cider	not entered	Malus	Malus domestica	fruit	Rosaceae	2016-10-07 11:00:00	TRUE	1292	orchard biome	agricultural feature	fermented apple beverage	misc environment	10	USA:CA:Julian	Malus domestica	1457994	33.0324	-116.582	food fermentation metagenome	Julian Ciderworks	1154581	Cider Fermentation	Newtown Pippen	A	fermenting apple juiceing apple juice	host-associated	plant	plant-corpus	yes	not entered	not entered	no	not applicable	not applicable	not applicable
CW_19.S_P2.T6_BA10_01_13095.mzXML	CW19_P2_T6	Newtown Pippen	simple	food	land	plant	fruit	fleshy fruit	pome	apple_cider	apple_cider	alcoholic	non-carbonated	cider	not entered	Malus	Malus domestica	fruit	Rosaceae	2016-10-07 11:00:00	TRUE	1292	orchard biome	agricultural feature	fermented apple beverage	misc environment	10	USA:CA:Julian	Malus domestica	1457994	33.0324	-116.582	food fermentation metagenome	Julian Ciderworks	1154581	Cider Fermentation	Newtown Pippen	B	fermenting apple juiceing apple juice	host-associated	plant	plant-corpus	yes	not entered	not entered	no	not applicable	not applicable	not applicable
CW_2.S_P1.T0_BA2_01_13087.mzXML	CW2_P1_T0	Newtown Pippen	simple	food	land	plant	fruit	fleshy fruit	pome	apple	apple	alcoholic	non-carbonated	cider	not entered	Malus	Malus domestica	fruit	Rosaceae	2016-09-27 11:00:00	TRUE	1292	orchard biome	agricultural feature	apple juice	misc environment	0	USA:CA:Julian	Malus domestica	1457994	33.0324	-116.582	food metagenome	Julian Ciderworks	870726	Cider Fermentation	Newtown Pippen	A	apple juice	host-associated	plant	plant-corpus	yes	not entered	not entered	no	not applicable	not applicable	not applicable
CW_20.S_P3.T6_BA11_01_13096.mzXML	CW20_P3_T6	Newtown Pippen	simple	food	land	plant	fruit	fleshy fruit	pome	apple_cider	apple_cider	alcoholic	non-carbonated	cider	not entered	Malus	Malus domestica	fruit	Rosaceae	2016-10-07 11:00:00	TRUE	1292	orchard biome	agricultural feature	fermented apple beverage	misc environment	10	USA:CA:Julian	Malus domestica	1457994	33.0324	-116.582	food fermentation metagenome	Julian Ciderworks	1154581	Cider Fermentation	Newtown Pippen	C	fermenting apple juiceing apple juice	host-associated	plant	plant-corpus	yes	not entered	not entered	no	not applicable	not applicable	not applicable
CW_21.S_P1.T7_BA12_01_13097.mzXML	CW21_P1_T7	Newtown Pippen	simple	food	land	plant	fruit	fleshy fruit	pome	apple_cider	apple_cider	alcoholic	non-carbonated	cider	not entered	Malus	Malus domestica	fruit	Rosaceae	2016-10-10 11:00:00	TRUE	1292	orchard biome	agricultural feature	fermented apple beverage	misc environment	13	USA:CA:Julian	Malus domestica	1457994	33.0324	-116.582	food fermentation metagenome	Julian Ciderworks	1154581	Cider Fermentation	Newtown Pippen	A	fermenting apple juiceing apple juice	host-associated	plant	plant-corpus	yes	not entered	not entered	no	not applicable	not applicable	not applicable
CW_22.S_P2.T7_BB2_01_13099.mzXML	CW22_P2_T7	Newtown Pippen	simple	food	land	plant	fruit	fleshy fruit	pome	apple_cider	apple_cider	alcoholic	non-carbonated	cider	not entered	Malus	Malus domestica	fruit	Rosaceae	2016-10-10 11:00:00	TRUE	1292	orchard biome	agricultural feature	fermented apple beverage	misc environment	13	USA:CA:Julian	Malus domestica	1457994	33.0324	-116.582	food fermentation metagenome	Julian Ciderworks	1154581	Cider Fermentation	Newtown Pippen	B	fermenting apple juiceing apple juice	host-associated	plant	plant-corpus	yes	not entered	not entered	no	not applicable	not applicable	not applicable
CW_23.S_P3.T7_BB3_01_13100.mzXML	CW23_P3_T7	Newtown Pippen	simple	food	land	plant	fruit	fleshy fruit	pome	apple_cider	apple_cider	alcoholic	non-carbonated	cider	not entered	Malus	Malus domestica	fruit	Rosaceae	2016-10-10 11:00:00	TRUE	1292	orchard biome	agricultural feature	fermented apple beverage	misc environment	13	USA:CA:Julian	Malus domestica	1457994	33.0324	-116.582	food fermentation metagenome	Julian Ciderworks	1154581	Cider Fermentation	Newtown Pippen	C	fermenting apple juiceing apple juice	host-associated	plant	plant-corpus	yes	not entered	not entered	no	not applicable	not applicable	not applicable
CW_24.S_P1.T8_BB4_01_13101.mzXML	CW24_P1_T8	Newtown Pippen	simple	food	land	plant	fruit	fleshy fruit	pome	apple_cider	apple_cider	alcoholic	non-carbonated	cider	not entered	Malus	Malus domestica	fruit	Rosaceae	2016-10-13 11:00:00	TRUE	1292	orchard biome	agricultural feature	fermented apple beverage	misc environment	16	USA:CA:Julian	Malus domestica	1457994	33.0324	-116.582	food fermentation metagenome	Julian Ciderworks	1154581	Cider Fermentation	Newtown Pippen	A	fermenting apple juiceing apple juice	host-associated	plant	plant-corpus	yes	not entered	not entered	no	not applicable	not applicable	not applicable
CW_25.S_P2.T8_BB5_01_13102.mzXML	CW25_P2_T8	Newtown Pippen	simple	food	land	plant	fruit	fleshy fruit	pome	apple_cider	apple_cider	alcoholic	non-carbonated	cider	not entered	Malus	Malus domestica	fruit	Rosaceae	2016-10-13 11:00:00	TRUE	1292	orchard biome	agricultural feature	fermented apple beverage	misc environment	16	USA:CA:Julian	Malus domestica	1457994	33.0324	-116.582	food fermentation metagenome	Julian Ciderworks	1154581	Cider Fermentation	Newtown Pippen	B	fermenting apple juiceing apple juice	host-associated	plant	plant-corpus	yes	not entered	not entered	no	not applicable	not applicable	not applicable
CW_26.S_P3.T8_BB6_01_13103.mzXML	CW26_P3_T8	Newtown Pippen	simple	food	land	plant	fruit	fleshy fruit	pome	apple_cider	apple_cider	alcoholic	non-carbonated	cider	not entered	Malus	Malus domestica	fruit	Rosaceae	2016-10-13 11:00:00	TRUE	1292	orchard biome	agricultural feature	fermented apple beverage	misc environment	16	USA:CA:Julian	Malus domestica	1457994	33.0324	-116.582	food fermentation metagenome	Julian Ciderworks	1154581	Cider Fermentation	Newtown Pippen	C	fermenting apple juiceing apple juice	host-associated	plant	plant-corpus	yes	not entered	not entered	no	not applicable	not applicable	not applicable
CW_27.S_P1.T9_BB7_01_13104.mzXML	CW27_P1_T9	Newtown Pippen	simple	food	land	plant	fruit	fleshy fruit	pome	apple_cider	apple_cider	alcoholic	non-carbonated	cider	not entered	Malus	Malus domestica	fruit	Rosaceae	2016-10-18 11:00:00	TRUE	1292	orchard biome	agricultural feature	fermented apple beverage	misc environment	21	USA:CA:Julian	Malus domestica	1457994	33.0324	-116.582	food fermentation metagenome	Julian Ciderworks	1154581	Cider Fermentation	Newtown Pippen	A	fermenting apple juiceing apple juice	host-associated	plant	plant-corpus	yes	not entered	not entered	no	not applicable	not applicable	not applicable
CW_28.S_P2.T9_BB8_01_13105.mzXML	CW28_P2_T9	Newtown Pippen	simple	food	land	plant	fruit	fleshy fruit	pome	apple_cider	apple_cider	alcoholic	non-carbonated	cider	not entered	Malus	Malus domestica	fruit	Rosaceae	2016-10-18 11:00:00	TRUE	1292	orchard biome	agricultural feature	fermented apple beverage	misc environment	21	USA:CA:Julian	Malus domestica	1457994	33.0324	-116.582	food fermentation metagenome	Julian Ciderworks	1154581	Cider Fermentation	Newtown Pippen	B	fermenting apple juiceing apple juice	host-associated	plant	plant-corpus	yes	not entered	not entered	no	not applicable	not applicable	not applicable
CW_29.S_P3.T9_BB9_01_13106.mzXML	CW29_P3_T9	Newtown Pippen	simple	food	land	plant	fruit	fleshy fruit	pome	apple_cider	apple_cider	alcoholic	non-carbonated	cider	not entered	Malus	Malus domestica	fruit	Rosaceae	2016-10-18 11:00:00	TRUE	1292	orchard biome	agricultural feature	fermented apple beverage	misc environment	21	USA:CA:Julian	Malus domestica	1457994	33.0324	-116.582	food fermentation metagenome	Julian Ciderworks	1154581	Cider Fermentation	Newtown Pippen	C	fermenting apple juiceing apple juice	host-associated	plant	plant-corpus	yes	not entered	not entered	no	not applicable	not applicable	not applicable
CW_3.S_P1.T1_BA3_01_13088.mzXML	CW3_P1_T1	Newtown Pippen	simple	food	land	plant	fruit	fleshy fruit	pome	apple_cider	apple_cider	alcoholic	non-carbonated	cider	not entered	Malus	Malus domestica	fruit	Rosaceae	2016-09-28 11:00:00	TRUE	1292	orchard biome	agricultural feature	fermented apple beverage	misc environment	1	USA:CA:Julian	Malus domestica	1457994	33.0324	-116.582	food fermentation metagenome	Julian Ciderworks	1154581	Cider Fermentation	Newtown Pippen	A	fermenting apple juiceing apple juice	host-associated	plant	plant-corpus	yes	not entered	not entered	no	not applicable	not applicable	not applicable
CW_33.S_P1.T10_BB10_01_13107.mzXML	CW33_P1_T10	Newtown Pippen	simple	food	land	plant	fruit	fleshy fruit	pome	apple_cider	apple_cider	alcoholic	non-carbonated	cider	not entered	Malus	Malus domestica	fruit	Rosaceae	2016-10-27 11:00:00	TRUE	1292	orchard biome	agricultural feature	fermented apple beverage	misc environment	30	USA:CA:Julian	Malus domestica	1457994	33.0324	-116.582	food fermentation metagenome	Julian Ciderworks	1154581	Cider Fermentation	Newtown Pippen	D	fermenting apple juiceing apple juice	host-associated	plant	plant-corpus	yes	not entered	not entered	no	not applicable	not applicable	not applicable
CW_34.S_P1.T11_BB11_01_13108.mzXML	CW34_P1_T11	Newtown Pippen	simple	food	land	plant	fruit	fleshy fruit	pome	apple_cider	apple_cider	alcoholic	non-carbonated	cider	not entered	Malus	Malus domestica	fruit	Rosaceae	2016-11-28 11:00:00	TRUE	1292	orchard biome	agricultural feature	fermented apple beverage	misc environment	60	USA:CA:Julian	Malus domestica	1457994	33.0324	-116.582	food fermentation metagenome	Julian Ciderworks	1154581	Cider Fermentation	Newtown Pippen	D	fermenting apple juiceing apple juice	host-associated	plant	plant-corpus	yes	not entered	not entered	no	not applicable	not applicable	not applicable
CW_35.S_P1.T12_BB12_01_13109.mzXML	CW35_P1_T12	Newtown Pippen	simple	food	land	plant	fruit	fleshy fruit	pome	apple_cider	apple_cider	alcoholic	non-carbonated	cider	not entered	Malus	Malus domestica	fruit	Rosaceae	2016-12-27 11:00:00	TRUE	1292	orchard biome	agricultural feature	fermented apple beverage	misc environment	90	USA:CA:Julian	Malus domestica	1457994	33.0324	-116.582	food fermentation metagenome	Julian Ciderworks	1154581	Cider Fermentation	Newtown Pippen	D	fermenting apple juiceing apple juice	host-associated	plant	plant-corpus	yes	not entered	not entered	no	not applicable	not applicable	not applicable
CW_37.S_G1.T0_BC2_01_13111.mzXML	CW37_G1_T0	Granny Smith	simple	food	land	plant	fruit	fleshy fruit	pome	apple	apple	alcoholic	non-carbonated	cider	not entered	Malus	Malus sp.	fruit	Rosaceae	2016-09-28 11:00:00	TRUE	1122	orchard biome	agricultural feature	apple juice	misc environment	0	USA:CA:Julian	Malus domestica	1457994	33.0938	-116.645	food metagenome	Peacefield Orchard	870726	Cider Fermentation	Granny Smith	A	apple juice	host-associated	plant	plant-corpus	yes	not entered	not entered	no	not applicable	not applicable	not applicable
CW_38.S_G1.T1_BC3_01_13112.mzXML	CW38_G1_T1	Granny Smith	simple	food	land	plant	fruit	fleshy fruit	pome	apple_cider	apple_cider	alcoholic	non-carbonated	cider	not entered	Malus	Malus sp.	fruit	Rosaceae	2016-09-28 11:00:00	TRUE	1122	orchard biome	agricultural feature	particulate material from skin	misc environment	1	USA:CA:Julian	Malus domestica	1457994	33.0938	-116.645	food fermentation metagenome	Peacefield Orchard	1154581	Cider Fermentation	Granny Smith	A	fermenting apple juice	host-associated	plant	plant-corpus	yes	not entered	not entered	no	not applicable	not applicable	not applicable
CW_39.S_G2.T1_BC4_01_13113.mzXML	CW39_G2_T1	Granny Smith	simple	food	land	plant	fruit	fleshy fruit	pome	apple_cider	apple_cider	alcoholic	non-carbonated	cider	not entered	Malus	Malus sp.	fruit	Rosaceae	2016-09-28 11:00:00	TRUE	1122	orchard biome	agricultural feature	particulate material from skin	misc environment	1	USA:CA:Julian	Malus domestica	1457994	33.0938	-116.645	food fermentation metagenome	Peacefield Orchard	1154581	Cider Fermentation	Granny Smith	A	fermenting apple juice	host-associated	plant	plant-corpus	yes	not entered	not entered	no	not applicable	not applicable	not applicable
CW_4.S_P2.T1_BA4_01_13089.mzXML	CW4_P2_T1	Newtown Pippen	simple	food	land	plant	fruit	fleshy fruit	pome	apple_cider	apple_cider	alcoholic	non-carbonated	cider	not entered	Malus	Malus domestica	fruit	Rosaceae	2016-09-28 11:00:00	TRUE	1292	orchard biome	agricultural feature	fermented apple beverage	misc environment	1	USA:CA:Julian	Malus domestica	1457994	33.0324	-116.582	food fermentation metagenome	Julian Ciderworks	1154581	Cider Fermentation	Newtown Pippen	B	fermenting apple juiceing apple juice	host-associated	plant	plant-corpus	yes	not entered	not entered	no	not applicable	not applicable	not applicable
CW_40.S_G3.T1_BC5_01_13114.mzXML	CW40_G3_T1	Granny Smith	simple	food	land	plant	fruit	fleshy fruit	pome	apple_cider	apple_cider	alcoholic	non-carbonated	cider	not entered	Malus	Malus sp.	fruit	Rosaceae	2016-09-28 11:00:00	TRUE	1122	orchard biome	agricultural feature	particulate material from skin	misc environment	1	USA:CA:Julian	Malus domestica	1457994	33.0938	-116.645	food fermentation metagenome	Peacefield Orchard	1154581	Cider Fermentation	Granny Smith	C	fermenting apple juice	host-associated	plant	plant-corpus	yes	not entered	not entered	no	not applicable	not applicable	not applicable
CW_41.S_G1.T2_BC6_01_13115.mzXML	CW41_G1_T2	Granny Smith	simple	food	land	plant	fruit	fleshy fruit	pome	apple_cider	apple_cider	alcoholic	non-carbonated	cider	not entered	Malus	Malus sp.	fruit	Rosaceae	2016-09-29 11:00:00	TRUE	1122	orchard biome	agricultural feature	particulate material from skin	misc environment	2	USA:CA:Julian	Malus domestica	1457994	33.0938	-116.645	food fermentation metagenome	Peacefield Orchard	1154581	Cider Fermentation	Granny Smith	A	fermenting apple juice	host-associated	plant	plant-corpus	yes	not entered	not entered	no	not applicable	not applicable	not applicable
CW_42.S_G2.T2_BC7_01_13116.mzXML	CW42_G2_T2	Granny Smith	simple	food	land	plant	fruit	fleshy fruit	pome	apple_cider	apple_cider	alcoholic	non-carbonated	cider	not entered	Malus	Malus sp.	fruit	Rosaceae	2016-09-29 11:00:00	TRUE	1122	orchard biome	agricultural feature	particulate material from skin	misc environment	2	USA:CA:Julian	Malus domestica	1457994	33.0938	-116.645	food fermentation metagenome	Peacefield Orchard	1154581	Cider Fermentation	Granny Smith	B	fermenting apple juice	host-associated	plant	plant-corpus	yes	not entered	not entered	no	not applicable	not applicable	not applicable
CW_43.S_G3.T2_BC8_01_13117.mzXML	CW43_G3_T2	Granny Smith	simple	food	land	plant	fruit	fleshy fruit	pome	apple_cider	apple_cider	alcoholic	non-carbonated	cider	not entered	Malus	Malus sp.	fruit	Rosaceae	2016-09-29 11:00:00	TRUE	1122	orchard biome	agricultural feature	particulate material from skin	misc environment	2	USA:CA:Julian	Malus domestica	1457994	33.0938	-116.645	food fermentation metagenome	Peacefield Orchard	1154581	Cider Fermentation	Granny Smith	C	fermenting apple juice	host-associated	plant	plant-corpus	yes	not entered	not entered	no	not applicable	not applicable	not applicable
CW_5.S_P3.T1_BA5_01_13090.mzXML	CW5_P3_T1	Newtown Pippen	simple	food	land	plant	fruit	fleshy fruit	pome	apple_cider	apple_cider	alcoholic	non-carbonated	cider	not entered	Malus	Malus domestica	fruit	Rosaceae	2016-09-28 11:00:00	TRUE	1292	orchard biome	agricultural feature	fermented apple beverage	misc environment	1	USA:CA:Julian	Malus domestica	1457994	33.0324	-116.582	food fermentation metagenome	Julian Ciderworks	1154581	Cider Fermentation	Newtown Pippen	C	fermenting apple juiceing apple juice	host-associated	plant	plant-corpus	yes	not entered	not entered	no	not applicable	not applicable	not applicable
CW_53.S_G1.T6_BC9_01_13118.mzXML	CW53_G1_T6	Granny Smith	simple	food	land	plant	fruit	fleshy fruit	pome	apple_cider	apple_cider	alcoholic	non-carbonated	cider	not entered	Malus	Malus sp.	fruit	Rosaceae	2016-10-07 11:00:00	TRUE	1122	orchard biome	agricultural feature	particulate material from skin	misc environment	10	USA:CA:Julian	Malus domestica	1457994	33.0938	-116.645	food fermentation metagenome	Peacefield Orchard	1154581	Cider Fermentation	Granny Smith	A	fermenting apple juice	host-associated	plant	plant-corpus	yes	not entered	not entered	no	not applicable	not applicable	not applicable
CW_54.S_G2.T6_BC10_01_13119.mzXML	CW54_G2_T6	Granny Smith	simple	food	land	plant	fruit	fleshy fruit	pome	apple_cider	apple_cider	alcoholic	non-carbonated	cider	not entered	Malus	Malus sp.	fruit	Rosaceae	2016-10-07 11:00:00	TRUE	1122	orchard biome	agricultural feature	particulate material from skin	misc environment	10	USA:CA:Julian	Malus domestica	1457994	33.0938	-116.645	food fermentation metagenome	Peacefield Orchard	1154581	Cider Fermentation	Granny Smith	B	fermenting apple juice	host-associated	plant	plant-corpus	yes	not entered	not entered	no	not applicable	not applicable	not applicable
CW_55.S_G3.T6_BC11_01_13120.mzXML	CW55_G3_T6	Granny Smith	simple	food	land	plant	fruit	fleshy fruit	pome	apple_cider	apple_cider	alcoholic	non-carbonated	cider	not entered	Malus	Malus sp.	fruit	Rosaceae	2016-10-07 11:00:00	TRUE	1122	orchard biome	agricultural feature	particulate material from skin	misc environment	10	USA:CA:Julian	Malus domestica	1457994	33.0938	-116.645	food fermentation metagenome	Peacefield Orchard	1154581	Cider Fermentation	Granny Smith	C	fermenting apple juice	host-associated	plant	plant-corpus	yes	not entered	not entered	no	not applicable	not applicable	not applicable
CW_56.S_G1.T7_BC12_01_13121.mzXML	CW56_G1_T7	Granny Smith	simple	food	land	plant	fruit	fleshy fruit	pome	apple_cider	apple_cider	alcoholic	non-carbonated	cider	not entered	Malus	Malus sp.	fruit	Rosaceae	2016-10-10 11:00:00	TRUE	1122	orchard biome	agricultural feature	particulate material from skin	misc environment	13	USA:CA:Julian	Malus domestica	1457994	33.0938	-116.645	food fermentation metagenome	Peacefield Orchard	1154581	Cider Fermentation	Granny Smith	A	fermenting apple juice	host-associated	plant	plant-corpus	yes	not entered	not entered	no	not applicable	not applicable	not applicable
CW_57.S_G2.T7_BD2_01_13123.mzXML	CW57_G2_T7	Granny Smith	simple	food	land	plant	fruit	fleshy fruit	pome	apple_cider	apple_cider	alcoholic	non-carbonated	cider	not entered	Malus	Malus sp.	fruit	Rosaceae	2016-10-10 11:00:00	TRUE	1122	orchard biome	agricultural feature	particulate material from skin	misc environment	13	USA:CA:Julian	Malus domestica	1457994	33.0938	-116.645	food fermentation metagenome	Peacefield Orchard	1154581	Cider Fermentation	Granny Smith	B	fermenting apple juice	host-associated	plant	plant-corpus	yes	not entered	not entered	no	not applicable	not applicable	not applicable
CW_58.S_G3.T7_BD3_01_13124.mzXML	CW58_G3_T7	Granny Smith	simple	food	land	plant	fruit	fleshy fruit	pome	apple_cider	apple_cider	alcoholic	non-carbonated	cider	not entered	Malus	Malus sp.	fruit	Rosaceae	2016-10-10 11:00:00	TRUE	1122	orchard biome	agricultural feature	particulate material from skin	misc environment	13	USA:CA:Julian	Malus domestica	1457994	33.0938	-116.645	food fermentation metagenome	Peacefield Orchard	1154581	Cider Fermentation	Granny Smith	C	fermenting apple juice	host-associated	plant	plant-corpus	yes	not entered	not entered	no	not applicable	not applicable	not applicable
CW_59.S_G1.T8_BD4_01_13125.mzXML	CW59_G1_T8	Granny Smith	simple	food	land	plant	fruit	fleshy fruit	pome	apple_cider	apple_cider	alcoholic	non-carbonated	cider	not entered	Malus	Malus sp.	fruit	Rosaceae	2016-10-13 11:00:00	TRUE	1122	orchard biome	agricultural feature	particulate material from skin	misc environment	16	USA:CA:Julian	Malus domestica	1457994	33.0938	-116.645	food fermentation metagenome	Peacefield Orchard	1154581	Cider Fermentation	Granny Smith	A	fermenting apple juice	host-associated	plant	plant-corpus	yes	not entered	not entered	no	not applicable	not applicable	not applicable
CW_6.S_P1.T2_BA6_01_13091.mzXML	CW6_P1_T2	Newtown Pippen	simple	food	land	plant	fruit	fleshy fruit	pome	apple_cider	apple_cider	alcoholic	non-carbonated	cider	not entered	Malus	Malus domestica	fruit	Rosaceae	2016-09-29 11:00:00	TRUE	1292	orchard biome	agricultural feature	fermented apple beverage	misc environment	2	USA:CA:Julian	Malus domestica	1457994	33.0324	-116.582	food fermentation metagenome	Julian Ciderworks	1154581	Cider Fermentation	Newtown Pippen	A	fermenting apple juiceing apple juice	host-associated	plant	plant-corpus	yes	not entered	not entered	no	not applicable	not applicable	not applicable
CW_60.S_G2.T8_BD5_01_13126.mzXML	CW60_G2_T8	Granny Smith	simple	food	land	plant	fruit	fleshy fruit	pome	apple_cider	apple_cider	alcoholic	non-carbonated	cider	not entered	Malus	Malus sp.	fruit	Rosaceae	2016-10-13 11:00:00	TRUE	1122	orchard biome	agricultural feature	particulate material from skin	misc environment	16	USA:CA:Julian	Malus domestica	1457994	33.0938	-116.645	food fermentation metagenome	Peacefield Orchard	1154581	Cider Fermentation	Granny Smith	B	fermenting apple juice	host-associated	plant	plant-corpus	yes	not entered	not entered	no	not applicable	not applicable	not applicable
CW_61.S_G3.T8_BD6_01_13127.mzXML	CW61_G3_T8	Granny Smith	simple	food	land	plant	fruit	fleshy fruit	pome	apple_cider	apple_cider	alcoholic	non-carbonated	cider	not entered	Malus	Malus sp.	fruit	Rosaceae	2016-10-13 11:00:00	TRUE	1122	orchard biome	agricultural feature	particulate material from skin	misc environment	16	USA:CA:Julian	Malus domestica	1457994	33.0938	-116.645	food fermentation metagenome	Peacefield Orchard	1154581	Cider Fermentation	Granny Smith	C	fermenting apple juice	host-associated	plant	plant-corpus	yes	not entered	not entered	no	not applicable	not applicable	not applicable
CW_62.S_G1.T9_BD7_01_13128.mzXML	CW62_G1_T9	Granny Smith	simple	food	land	plant	fruit	fleshy fruit	pome	apple_cider	apple_cider	alcoholic	non-carbonated	cider	not entered	Malus	Malus sp.	fruit	Rosaceae	2016-10-18 11:00:00	TRUE	1122	orchard biome	agricultural feature	particulate material from skin	misc environment	21	USA:CA:Julian	Malus domestica	1457994	33.0938	-116.645	food fermentation metagenome	Peacefield Orchard	1154581	Cider Fermentation	Granny Smith	A	fermenting apple juice	host-associated	plant	plant-corpus	yes	not entered	not entered	no	not applicable	not applicable	not applicable
CW_63.S_G2.T9_BD8_01_13129.mzXML	CW63_G2_T9	Granny Smith	simple	food	land	plant	fruit	fleshy fruit	pome	apple_cider	apple_cider	alcoholic	non-carbonated	cider	not entered	Malus	Malus sp.	fruit	Rosaceae	2016-10-18 11:00:00	TRUE	1122	orchard biome	agricultural feature	particulate material from skin	misc environment	21	USA:CA:Julian	Malus domestica	1457994	33.0938	-116.645	food fermentation metagenome	Peacefield Orchard	1154581	Cider Fermentation	Granny Smith	B	fermenting apple juice	host-associated	plant	plant-corpus	yes	not entered	not entered	no	not applicable	not applicable	not applicable
CW_64.S_G3.T9_BD9_01_13130.mzXML	CW64_G3_T9	Granny Smith	simple	food	land	plant	fruit	fleshy fruit	pome	apple_cider	apple_cider	alcoholic	non-carbonated	cider	not entered	Malus	Malus sp.	fruit	Rosaceae	2016-10-18 11:00:00	TRUE	1122	orchard biome	agricultural feature	particulate material from skin	misc environment	21	USA:CA:Julian	Malus domestica	1457994	33.0938	-116.645	food fermentation metagenome	Peacefield Orchard	1154581	Cider Fermentation	Granny Smith	C	fermenting apple juice	host-associated	plant	plant-corpus	yes	not entered	not entered	no	not applicable	not applicable	not applicable
CW_68.S_G1.T10_BD10_01_13131.mzXML	CW68_G1_T10	Granny Smith	simple	food	land	plant	fruit	fleshy fruit	pome	apple_cider	apple_cider	alcoholic	non-carbonated	cider	not entered	Malus	Malus sp.	fruit	Rosaceae	2016-10-27 11:00:00	TRUE	1122	orchard biome	agricultural feature	particulate material from skin	misc environment	30	USA:CA:Julian	Malus domestica	1457994	33.0938	-116.645	food fermentation metagenome	Peacefield Orchard	1154581	Cider Fermentation	Granny Smith	D	fermenting apple juice	host-associated	plant	plant-corpus	yes	not entered	not entered	no	not applicable	not applicable	not applicable
CW_69.S_G1.T11_BD11_01_13132.mzXML	CW69_G1_T11	Granny Smith	simple	food	land	plant	fruit	fleshy fruit	pome	apple_cider	apple_cider	alcoholic	non-carbonated	cider	not entered	Malus	Malus sp.	fruit	Rosaceae	2016-11-28 11:00:00	TRUE	1122	orchard biome	agricultural feature	particulate material from skin	misc environment	60	USA:CA:Julian	Malus domestica	1457994	33.0938	-116.645	food fermentation metagenome	Peacefield Orchard	1154581	Cider Fermentation	Granny Smith	D	fermenting apple juice	host-associated	plant	plant-corpus	yes	not entered	not entered	no	not applicable	not applicable	not applicable
CW_7.S_P2.T2_BA7_01_13092.mzXML	CW7_P2_T2	Newtown Pippen	simple	food	land	plant	fruit	fleshy fruit	pome	apple_cider	apple_cider	alcoholic	non-carbonated	cider	not entered	Malus	Malus domestica	fruit	Rosaceae	2016-09-29 11:00:00	TRUE	1292	orchard biome	agricultural feature	fermented apple beverage	misc environment	2	USA:CA:Julian	Malus domestica	1457994	33.0324	-116.582	food fermentation metagenome	Julian Ciderworks	1154581	Cider Fermentation	Newtown Pippen	B	fermenting apple juiceing apple juice	host-associated	plant	plant-corpus	yes	not entered	not entered	no	not applicable	not applicable	not applicable
CW_70.S_G1.T12_BD12_01_13133.mzXML	CW70_G1_T12	Granny Smith	simple	food	land	plant	fruit	fleshy fruit	pome	apple_cider	apple_cider	alcoholic	non-carbonated	cider	not entered	Malus	Malus sp.	fruit	Rosaceae	2016-12-27 11:00:00	TRUE	1122	orchard biome	agricultural feature	particulate material from skin	misc environment	90	USA:CA:Julian	Malus domestica	1457994	33.0938	-116.645	food fermentation metagenome	Peacefield Orchard	1154581	Cider Fermentation	Granny Smith	D	fermenting apple juice	host-associated	plant	plant-corpus	yes	not entered	not entered	no	not applicable	not applicable	not applicable
CW_72.S_R1.T0_BE2_01_13135.mzXML	CW72_S_R1_T0	Ribston Pippen	simple	food	land	plant	fruit	fleshy fruit	pome	apple	apple	alcoholic	non-carbonated	cider	not entered	Malus	Malus sp.	fruit	Rosaceae	2016-10-24 11:00:00	TRUE	1122	orchard biome	agricultural feature	apple juice	misc environment	0	USA:CA:Julian	Malus domestica	1457994	33.0666	-116.592	food metagenome	Limon Orchard	870726	Cider Fermentation	Ribston Pippen	A	apple juice	host-associated	plant	plant-corpus	yes	not entered	not entered	no	not applicable	not applicable	not applicable
CW_73.S_R1.T1_BE3_01_13136.mzXML	CW73_S_R1_T1	Ribston Pippen	simple	food	land	plant	fruit	fleshy fruit	pome	apple_cider	apple_cider	alcoholic	non-carbonated	cider	not entered	Malus	Malus sp.	fruit	Rosaceae	2016-10-25 11:00:00	TRUE	1122	orchard biome	agricultural feature	particulate material from skin	misc environment	1	USA:CA:Julian	Malus domestica	1457994	33.0666	-116.592	food fermentation metagenome	Limon Orchard	1154581	Cider Fermentation	Ribston Pippen	A	fermenting apple juice	host-associated	plant	plant-corpus	yes	not entered	not entered	no	not applicable	not applicable	not applicable
CW_74.S_R2.T1_BE4_01_13137.mzXML	CW74_S_R2_T1	Ribston Pippen	simple	food	land	plant	fruit	fleshy fruit	pome	apple_cider	apple_cider	alcoholic	non-carbonated	cider	not entered	Malus	Malus sp.	fruit	Rosaceae	2016-10-25 11:00:00	TRUE	1122	orchard biome	agricultural feature	particulate material from skin	misc environment	1	USA:CA:Julian	Malus domestica	1457994	33.0666	-116.592	food fermentation metagenome	Limon Orchard	1154581	Cider Fermentation	Ribston Pippen	B	fermenting apple juice	host-associated	plant	plant-corpus	yes	not entered	not entered	no	not applicable	not applicable	not applicable
CW_75.S_R3.T1_BE5_01_13138.mzXML	CW75_S_R3_T1	Ribston Pippen	simple	food	land	plant	fruit	fleshy fruit	pome	apple_cider	apple_cider	alcoholic	non-carbonated	cider	not entered	Malus	Malus sp.	fruit	Rosaceae	2016-10-25 11:00:00	TRUE	1122	orchard biome	agricultural feature	particulate material from skin	misc environment	1	USA:CA:Julian	Malus domestica	1457994	33.0666	-116.592	food fermentation metagenome	Limon Orchard	1154581	Cider Fermentation	Ribston Pippen	C	fermenting apple juice	host-associated	plant	plant-corpus	yes	not entered	not entered	no	not applicable	not applicable	not applicable
CW_76.S_R1.T2_BE6_01_13139.mzXML	CW76_S_R1_T2	Ribston Pippen	simple	food	land	plant	fruit	fleshy fruit	pome	apple_cider	apple_cider	alcoholic	non-carbonated	cider	not entered	Malus	Malus sp.	fruit	Rosaceae	2016-10-26 11:00:00	TRUE	1122	orchard biome	agricultural feature	particulate material from skin	misc environment	2	USA:CA:Julian	Malus domestica	1457994	33.0666	-116.592	food fermentation metagenome	Limon Orchard	1154581	Cider Fermentation	Ribston Pippen	A	fermenting apple juice	host-associated	plant	plant-corpus	yes	not entered	not entered	no	not applicable	not applicable	not applicable
CW_77.S_R2.T2_BE7_01_13140.mzXML	CW77_S_R2_T2	Ribston Pippen	simple	food	land	plant	fruit	fleshy fruit	pome	apple_cider	apple_cider	alcoholic	non-carbonated	cider	not entered	Malus	Malus sp.	fruit	Rosaceae	2016-10-26 11:00:00	TRUE	1122	orchard biome	agricultural feature	particulate material from skin	misc environment	2	USA:CA:Julian	Malus domestica	1457994	33.0666	-116.592	food fermentation metagenome	Limon Orchard	1154581	Cider Fermentation	Ribston Pippen	B	fermenting apple juice	host-associated	plant	plant-corpus	yes	not entered	not entered	no	not applicable	not applicable	not applicable
CW_78.S_R3.T2_BE8_01_13141.mzXML	CW78_S_R3_T2	Ribston Pippen	simple	food	land	plant	fruit	fleshy fruit	pome	apple_cider	apple_cider	alcoholic	non-carbonated	cider	not entered	Malus	Malus sp.	fruit	Rosaceae	2016-10-26 11:00:00	TRUE	1122	orchard biome	agricultural feature	particulate material from skin	misc environment	2	USA:CA:Julian	Malus domestica	1457994	33.0666	-116.592	food fermentation metagenome	Limon Orchard	1154581	Cider Fermentation	Ribston Pippen	C	fermenting apple juice	host-associated	plant	plant-corpus	yes	not entered	not entered	no	not applicable	not applicable	not applicable
CW_79.S_R1.T3_BE9_01_13142.mzXML	CW79_S_R1_T3	Ribston Pippen	simple	food	land	plant	fruit	fleshy fruit	pome	apple_cider	apple_cider	alcoholic	non-carbonated	cider	not entered	Malus	Malus sp.	fruit	Rosaceae	2016-10-27 11:00:00	TRUE	1122	orchard biome	agricultural feature	particulate material from skin	misc environment	3	USA:CA:Julian	Malus domestica	1457994	33.0666	-116.592	food fermentation metagenome	Limon Orchard	1154581	Cider Fermentation	Ribston Pippen	A	fermenting apple juice	host-associated	plant	plant-corpus	yes	not entered	not entered	no	not applicable	not applicable	not applicable
CW_8.S_P3.T2_BA8_01_13093.mzXML	CW8_P3_T2	Newtown Pippen	simple	food	land	plant	fruit	fleshy fruit	pome	apple_cider	apple_cider	alcoholic	non-carbonated	cider	not entered	Malus	Malus domestica	fruit	Rosaceae	2016-09-29 11:00:00	TRUE	1292	orchard biome	agricultural feature	fermented apple beverage	misc environment	2	USA:CA:Julian	Malus domestica	1457994	33.0324	-116.582	food fermentation metagenome	Julian Ciderworks	1154581	Cider Fermentation	Newtown Pippen	C	fermenting apple juiceing apple juice	host-associated	plant	plant-corpus	yes	not entered	not entered	no	not applicable	not applicable	not applicable
CW_80.S_R2.T3_BE10_01_13143.mzXML	CW80_S_R2_T3	Ribston Pippen	simple	food	land	plant	fruit	fleshy fruit	pome	apple_cider	apple_cider	alcoholic	non-carbonated	cider	not entered	Malus	Malus sp.	fruit	Rosaceae	2016-10-27 11:00:00	TRUE	1122	orchard biome	agricultural feature	particulate material from skin	misc environment	3	USA:CA:Julian	Malus domestica	1457994	33.0666	-116.592	food fermentation metagenome	Limon Orchard	1154581	Cider Fermentation	Ribston Pippen	B	fermenting apple juice	host-associated	plant	plant-corpus	yes	not entered	not entered	no	not applicable	not applicable	not applicable
CW_81.S_R3.T3_BE11_01_13144.mzXML	CW81_S_R3_T3	Ribston Pippen	simple	food	land	plant	fruit	fleshy fruit	pome	apple_cider	apple_cider	alcoholic	non-carbonated	cider	not entered	Malus	Malus sp.	fruit	Rosaceae	2016-10-27 11:00:00	TRUE	1122	orchard biome	agricultural feature	particulate material from skin	misc environment	3	USA:CA:Julian	Malus domestica	1457994	33.0666	-116.592	food fermentation metagenome	Limon Orchard	1154581	Cider Fermentation	Ribston Pippen	C	fermenting apple juice	host-associated	plant	plant-corpus	yes	not entered	not entered	no	not applicable	not applicable	not applicable
CW_82.S_R1.T4_BE12_01_13145.mzXML	CW82_S_R1_T4	Ribston Pippen	simple	food	land	plant	fruit	fleshy fruit	pome	apple_cider	apple_cider	alcoholic	non-carbonated	cider	not entered	Malus	Malus sp.	fruit	Rosaceae	2016-10-28 11:00:00	TRUE	1122	orchard biome	agricultural feature	particulate material from skin	misc environment	4	USA:CA:Julian	Malus domestica	1457994	33.0666	-116.592	food fermentation metagenome	Limon Orchard	1154581	Cider Fermentation	Ribston Pippen	A	fermenting apple juice	host-associated	plant	plant-corpus	yes	not entered	not entered	no	not applicable	not applicable	not applicable
CW_83.S_R2.T4_BF2_01_13147.mzXML	CW83_S_R2_T4	Ribston Pippen	simple	food	land	plant	fruit	fleshy fruit	pome	apple_cider	apple_cider	alcoholic	non-carbonated	cider	not entered	Malus	Malus sp.	fruit	Rosaceae	2016-10-28 11:00:00	TRUE	1122	orchard biome	agricultural feature	particulate material from skin	misc environment	4	USA:CA:Julian	Malus domestica	1457994	33.0666	-116.592	food fermentation metagenome	Limon Orchard	1154581	Cider Fermentation	Ribston Pippen	B	fermenting apple juice	host-associated	plant	plant-corpus	yes	not entered	not entered	no	not applicable	not applicable	not applicable
CW_84.S_R3.T4_BF3_01_13148.mzXML	CW84_S_R3_T4	Ribston Pippen	simple	food	land	plant	fruit	fleshy fruit	pome	apple_cider	apple_cider	alcoholic	non-carbonated	cider	not entered	Malus	Malus sp.	fruit	Rosaceae	2016-10-28 11:00:00	TRUE	1122	orchard biome	agricultural feature	particulate material from skin	misc environment	4	USA:CA:Julian	Malus domestica	1457994	33.0666	-116.592	food fermentation metagenome	Limon Orchard	1154581	Cider Fermentation	Ribston Pippen	C	fermenting apple juice	host-associated	plant	plant-corpus	yes	not entered	not entered	no	not applicable	not applicable	not applicable
CW_85.S_R1.T5_BF4_01_13149.mzXML	CW85_S_R1_T5	Ribston Pippen	simple	food	land	plant	fruit	fleshy fruit	pome	apple_cider	apple_cider	alcoholic	non-carbonated	cider	not entered	Malus	Malus sp.	fruit	Rosaceae	2016-10-30 11:00:00	TRUE	1122	orchard biome	agricultural feature	particulate material from skin	misc environment	6	USA:CA:Julian	Malus domestica	1457994	33.0666	-116.592	food fermentation metagenome	Limon Orchard	1154581	Cider Fermentation	Ribston Pippen	A	fermenting apple juice	host-associated	plant	plant-corpus	yes	not entered	not entered	no	not applicable	not applicable	not applicable
CW_85.S_R2.T8_BG3_01_13160.mzXML	CW86_S_R2_T5	Ribston Pippen	simple	food	land	plant	fruit	fleshy fruit	pome	apple_cider	apple_cider	alcoholic	non-carbonated	cider	not entered	Malus	Malus sp.	fruit	Rosaceae	2016-10-30 11:00:00	TRUE	1122	orchard biome	agricultural feature	particulate material from skin	misc environment	6	USA:CA:Julian	Malus domestica	1457994	33.0666	-116.592	food fermentation metagenome	Limon Orchard	1154581	Cider Fermentation	Ribston Pippen	B	fermenting apple juice	host-associated	plant	plant-corpus	yes	not entered	not entered	no	not applicable	not applicable	not applicable
CW_86.S_R2.T5_BF5_01_13150.mzXML	CW87_S_R3_T5	Ribston Pippen	simple	food	land	plant	fruit	fleshy fruit	pome	apple_cider	apple_cider	alcoholic	non-carbonated	cider	not entered	Malus	Malus sp.	fruit	Rosaceae	2016-10-30 11:00:00	TRUE	1122	orchard biome	agricultural feature	particulate material from skin	misc environment	6	USA:CA:Julian	Malus domestica	1457994	33.0666	-116.592	food fermentation metagenome	Limon Orchard	1154581	Cider Fermentation	Ribston Pippen	C	fermenting apple juice	host-associated	plant	plant-corpus	yes	not entered	not entered	no	not applicable	not applicable	not applicable
CW_87.S_R3.T5_BF6_01_13151.mzXML	CW88_S_R1_T6	Ribston Pippen	simple	food	land	plant	fruit	fleshy fruit	pome	apple_cider	apple_cider	alcoholic	non-carbonated	cider	not entered	Malus	Malus sp.	fruit	Rosaceae	2016-11-01 11:00:00	TRUE	1122	orchard biome	agricultural feature	particulate material from skin	misc environment	8	USA:CA:Julian	Malus domestica	1457994	33.0666	-116.592	food fermentation metagenome	Limon Orchard	1154581	Cider Fermentation	Ribston Pippen	A	fermenting apple juice	host-associated	plant	plant-corpus	yes	not entered	not entered	no	not applicable	not applicable	not applicable
CW_88.S_R1.T6_BF7_01_13152.mzXML	CW89_S_R2_T6	Ribston Pippen	simple	food	land	plant	fruit	fleshy fruit	pome	apple_cider	apple_cider	alcoholic	non-carbonated	cider	not entered	Malus	Malus sp.	fruit	Rosaceae	2016-11-01 11:00:00	TRUE	1122	orchard biome	agricultural feature	particulate material from skin	misc environment	8	USA:CA:Julian	Malus domestica	1457994	33.0666	-116.592	food fermentation metagenome	Limon Orchard	1154581	Cider Fermentation	Ribston Pippen	B	fermenting apple juice	host-associated	plant	plant-corpus	yes	not entered	not entered	no	not applicable	not applicable	not applicable
CW_89.S_R2.T6_BF8_01_13153.mzXML	CW90_S_R3_T6	Ribston Pippen	simple	food	land	plant	fruit	fleshy fruit	pome	apple_cider	apple_cider	alcoholic	non-carbonated	cider	not entered	Malus	Malus sp.	fruit	Rosaceae	2016-11-01 11:00:00	TRUE	1122	orchard biome	agricultural feature	particulate material from skin	misc environment	8	USA:CA:Julian	Malus domestica	1457994	33.0666	-116.592	food fermentation metagenome	Limon Orchard	1154581	Cider Fermentation	Ribston Pippen	C	fermenting apple juice	host-associated	plant	plant-corpus	yes	not entered	not entered	no	not applicable	not applicable	not applicable
CW_90.S_R3.T6_BF9_01_13154.mzXML	CW91_S_R1_T7	Ribston Pippen	simple	food	land	plant	fruit	fleshy fruit	pome	apple_cider	apple_cider	alcoholic	non-carbonated	cider	not entered	Malus	Malus sp.	fruit	Rosaceae	2016-11-03 11:00:00	TRUE	1122	orchard biome	agricultural feature	particulate material from skin	misc environment	10	USA:CA:Julian	Malus domestica	1457994	33.0666	-116.592	food fermentation metagenome	Limon Orchard	1154581	Cider Fermentation	Ribston Pippen	A	fermenting apple juice	host-associated	plant	plant-corpus	yes	not entered	not entered	no	not applicable	not applicable	not applicable
CW_91.S_R1.T7_BF10_01_13155.mzXML	CW92_S_R2_T7	Ribston Pippen	simple	food	land	plant	fruit	fleshy fruit	pome	apple_cider	apple_cider	alcoholic	non-carbonated	cider	not entered	Malus	Malus sp.	fruit	Rosaceae	2016-11-03 11:00:00	TRUE	1122	orchard biome	agricultural feature	particulate material from skin	misc environment	10	USA:CA:Julian	Malus domestica	1457994	33.0666	-116.592	food fermentation metagenome	Limon Orchard	1154581	Cider Fermentation	Ribston Pippen	B	fermenting apple juice	host-associated	plant	plant-corpus	yes	not entered	not entered	no	not applicable	not applicable	not applicable
CW_92.S_R2.T7_BF11_01_13156.mzXML	CW93_S_R3_T7	Ribston Pippen	simple	food	land	plant	fruit	fleshy fruit	pome	apple_cider	apple_cider	alcoholic	non-carbonated	cider	not entered	Malus	Malus sp.	fruit	Rosaceae	2016-11-03 11:00:00	TRUE	1122	orchard biome	agricultural feature	particulate material from skin	misc environment	10	USA:CA:Julian	Malus domestica	1457994	33.0666	-116.592	food fermentation metagenome	Limon Orchard	1154581	Cider Fermentation	Ribston Pippen	C	fermenting apple juice	host-associated	plant	plant-corpus	yes	not entered	not entered	no	not applicable	not applicable	not applicable
CW_93.S_R3.T7_BF12_01_13157.mzXML	CW94_S_R1_T8	Ribston Pippen	simple	food	land	plant	fruit	fleshy fruit	pome	apple_cider	apple_cider	alcoholic	non-carbonated	cider	not entered	Malus	Malus sp.	fruit	Rosaceae	2016-11-05 11:00:00	TRUE	1122	orchard biome	agricultural feature	particulate material from skin	misc environment	12	USA:CA:Julian	Malus domestica	1457994	33.0666	-116.592	food fermentation metagenome	Limon Orchard	1154581	Cider Fermentation	Ribston Pippen	A	fermenting apple juice	host-associated	plant	plant-corpus	yes	not entered	not entered	no	not applicable	not applicable	not applicable
CW_94.S_R1.T8_BG2_01_13159.mzXML	CW95_R2_T8	Ribston Pippen	simple	food	land	plant	fruit	fleshy fruit	pome	apple_cider	apple_cider	alcoholic	non-carbonated	cider	not entered	Malus	Malus sp.	fruit	Rosaceae	2016-11-05 11:00:00	TRUE	1122	orchard biome	agricultural feature	particulate material from skin	misc environment	12	USA:CA:Julian	Malus domestica	1457994	33.0666	-116.592	food fermentation metagenome	Limon Orchard	1154581	Cider Fermentation	Ribston Pippen	B	fermenting apple juice	host-associated	plant	plant-corpus	yes	not entered	not entered	no	not applicable	not applicable	not applicable
CW_96.S_R3.T8_BG4_01_13161.mzXML	CW96_S_R3_T8	Ribston Pippen	simple	food	land	plant	fruit	fleshy fruit	pome	apple_cider	apple_cider	alcoholic	non-carbonated	cider	not entered	Malus	Malus sp.	fruit	Rosaceae	2016-11-05 11:00:00	TRUE	1122	orchard biome	agricultural feature	particulate material from skin	misc environment	12	USA:CA:Julian	Malus domestica	1457994	33.0666	-116.592	food fermentation metagenome	Limon Orchard	1154581	Cider Fermentation	Ribston Pippen	C	fermenting apple juice	host-associated	plant	plant-corpus	yes	not entered	not entered	no	not applicable	not applicable	not applicable
CW_97.S_R1.T9_BG5_01_13162.mzXML	CW97_S_R1_T9	Ribston Pippen	simple	food	land	plant	fruit	fleshy fruit	pome	apple_cider	apple_cider	alcoholic	non-carbonated	cider	not entered	Malus	Malus sp.	fruit	Rosaceae	2016-11-08 11:00:00	TRUE	1122	orchard biome	agricultural feature	particulate material from skin	misc environment	15	USA:CA:Julian	Malus domestica	1457994	33.0666	-116.592	food fermentation metagenome	Limon Orchard	1154581	Cider Fermentation	Ribston Pippen	A	fermenting apple juice	host-associated	plant	plant-corpus	yes	not entered	not entered	no	not applicable	not applicable	not applicable
CW_98.S_R2.T9_BG6_01_13163.mzXML	CW98_S_R2_T9	Ribston Pippen	simple	food	land	plant	fruit	fleshy fruit	pome	apple_cider	apple_cider	alcoholic	non-carbonated	cider	not entered	Malus	Malus sp.	fruit	Rosaceae	2016-11-08 11:00:00	TRUE	1122	orchard biome	agricultural feature	particulate material from skin	misc environment	15	USA:CA:Julian	Malus domestica	1457994	33.0666	-116.592	food fermentation metagenome	Limon Orchard	1154581	Cider Fermentation	Ribston Pippen	B	fermenting apple juice	host-associated	plant	plant-corpus	yes	not entered	not entered	no	not applicable	not applicable	not applicable
CW_99.S_R3.T9_BG7_01_13164.mzXML	CW99_S_R3_T9	Ribston Pippen	simple	food	land	plant	fruit	fleshy fruit	pome	apple_cider	apple_cider	alcoholic	non-carbonated	cider	not entered	Malus	Malus sp.	fruit	Rosaceae	2016-11-08 11:00:00	TRUE	1122	orchard biome	agricultural feature	particulate material from skin	misc environment	15	USA:CA:Julian	Malus domestica	1457994	33.0666	-116.592	food fermentation metagenome	Limon Orchard	1154581	Cider Fermentation	Ribston Pippen	C	fermenting apple juice	host-associated	plant	plant-corpus	yes	not entered	not entered	no	not applicable	not applicable	not applicable
cw1. PI. skin_1x_RC12_01_21689.mzXML	CW1_P1_skin	Newtown Pippen	simple	food	land	plant	fruit	fleshy fruit	pome	apple	apple	alcoholic	non-carbonated	cider	not entered	Malus	Malus domestica	fruit	Rosaceae	2016-09-27 11:00:00	TRUE	1292	orchard biome	agricultural feature	plant fruit food product	plant-associated	0	USA:CA:Julian	Malus domestica	1457994	33.0324	-116.582	food metagenome	Julian Ciderworks	870726	Cider Fermentation	Newtown Pippen	A	apple skin	host-associated	plant	plant-corpus	yes	not entered	not entered	no	not applicable	not applicable	not applicable
cw105.F1.skin_G86762_5x_witt_RD12_01_21690.mzXML	CW109_F1_skin	Fuji	simple	food	land	plant	fruit	fleshy fruit	pome	apple	apple	not applicable	not applicable	not applicable	not entered	Malus	Malus pumila	fruit	Rosaceae	2016-10-24 11:00:00	TRUE	1122	orchard biome	agricultural feature	particulate material from skin	plant-associated	0	USA:CA:Julian	Malus domestica	1457994	33.0666	-116.592	food metagenome	Limon Orchard	870726	Cider Fermentation	Fuji	A	apple skin	host-associated	plant	plant-corpus	no	not entered	not entered	no	not applicable	not applicable	not applicable
cw71.R1.skin_G86763_5x_witt_RB12_01_21687.mzXML	CW71_R1_skin	Ribston Pippen	simple	food	land	plant	fruit	fleshy fruit	pome	apple	apple	alcoholic	non-carbonated	cider	not entered	Malus	Malus sp.	fruit	Rosaceae	2016-10-24 11:00:00	TRUE	1122	orchard biome	agricultural feature	plant fruit food product	plant-associated	0	USA:CA:Julian	Malus domestica	1457994	33.0666	-116.592	food metagenome	Limon Orchard	870726	Cider Fermentation	Ribston Pippen	A	apple skin	host-associated	plant	plant-corpus	yes	not entered	not entered	no	not applicable	not applicable	not applicable
Fish_1_1x_GD1_01_20491.mzXML	mackerel_red	pacific mackerel- self caught	simple	food	aquatic	animal	animal	seafood	fish_saltwater	mackerel	red	not applicable	not applicable	not applicable	frozen	not applicable	not applicable	not applicable	not collected	not provided	TRUE	193	urban biome	anthropogenic environmental material	food product	misc environment	none	USA:CA:San Diego	not entered	not entered	32.842	-117.258	food metagenome	not entered	870726	Mackerel_hologenome	not applicable	not applicable	fish organs	host-associated	animal	animal-corpus	no	14	not provided	no	not applicable	not applicable	not applicable
Fish_10_1x_GE2_01_20520.mzXML	mackerel_bile	pacific mackerel- self caught	simple	food	aquatic	animal	animal	seafood	fish_saltwater	mackerel	bile	not applicable	not applicable	not applicable	frozen	not applicable	not applicable	not applicable	not collected	not provided	TRUE	202	urban biome	anthropogenic environmental material	food product	misc environment	none	USA:CA:San Diego	not entered	not entered	32.842	-117.258	food metagenome	not entered	870726	Mackerel_hologenome	not applicable	not applicable	fish organs	host-associated	animal	animal-corpus	no	not applicable	not provided	no	not applicable	not applicable	not applicable
Fish_11_1x_GE3_01_20523.mzXML	mackerel_liver_15	pacific mackerel- self caught	simple	food	aquatic	animal	animal	seafood	fish_saltwater	mackerel	liver_15	not applicable	not applicable	not applicable	frozen	not applicable	not applicable	not applicable	not collected	not provided	TRUE	203	urban biome	anthropogenic environmental material	food product	misc environment	none	USA:CA:San Diego	not entered	not entered	32.842	-117.258	food metagenome	not entered	870726	Mackerel_hologenome	not applicable	not applicable	fish organs	host-associated	animal	animal-corpus	no	not applicable	not provided	no	not applicable	not applicable	not applicable
Fish_12_1x_GE4_01_20525.mzXML	mackerel_brain	pacific mackerel- self caught	simple	food	aquatic	animal	animal	seafood	fish_saltwater	mackerel	brain	not applicable	not applicable	not applicable	frozen	not applicable	not applicable	not applicable	not collected	not provided	TRUE	204	urban biome	anthropogenic environmental material	food product	misc environment	none	USA:CA:San Diego	not entered	not entered	32.842	-117.258	food metagenome	not entered	870726	Mackerel_hologenome	not applicable	not applicable	fish organs	host-associated	animal	animal-corpus	no	not applicable	not provided	no	not applicable	not applicable	not applicable
Fish_13_1x_GE5_01_20528.mzXML	mackerel_side_muscle_6	pacific mackerel- self caught	simple	food	aquatic	animal	animal	seafood	fish_saltwater	mackerel	side_muscle_6	not applicable	not applicable	not applicable	frozen	not applicable	not applicable	not applicable	not collected	not provided	TRUE	205	urban biome	anthropogenic environmental material	food product	misc environment	none	USA:CA:San Diego	not entered	not entered	32.842	-117.258	food metagenome	not entered	870726	Mackerel_hologenome	not applicable	not applicable	fish organs	host-associated	animal	animal-corpus	no	not applicable	not provided	no	not applicable	not applicable	not applicable
Fish_14_1x_GE6_01_20531.mzXML	mackerel_gonad_13	pacific mackerel- self caught	simple	food	aquatic	animal	animal	seafood	fish_saltwater	mackerel	gonad_13	not applicable	not applicable	not applicable	frozen	not applicable	not applicable	not applicable	not collected	not provided	TRUE	206	urban biome	anthropogenic environmental material	food product	misc environment	none	USA:CA:San Diego	not entered	not entered	32.842	-117.258	food metagenome	not entered	870726	Mackerel_hologenome	not applicable	not applicable	fish organs	host-associated	animal	animal-corpus	no	not applicable	not provided	no	not applicable	not applicable	not applicable
Fish_15_1x_GE7_01_20534.mzXML	mackerel_pylo_cec_10	pacific mackerel- self caught	simple	food	aquatic	animal	animal	seafood	fish_saltwater	mackerel	pylo_cec_10	not applicable	not applicable	not applicable	frozen	not applicable	not applicable	not applicable	not collected	not provided	TRUE	207	urban biome	anthropogenic environmental material	food product	misc environment	none	USA:CA:San Diego	not entered	not entered	32.842	-117.258	food metagenome	not entered	870726	Mackerel_hologenome	not applicable	not applicable	fish organs	host-associated	animal	animal-corpus	no	not applicable	not provided	no	not applicable	not applicable	not applicable
Fish_16_1x_GE8_01_20537.mzXML	mackerel_dig	pacific mackerel- self caught	simple	food	aquatic	animal	animal	seafood	fish_saltwater	mackerel	dig	not applicable	not applicable	not applicable	frozen	not applicable	not applicable	not applicable	not collected	not provided	TRUE	208	urban biome	anthropogenic environmental material	food product	misc environment	none	USA:CA:San Diego	not entered	not entered	32.842	-117.258	food metagenome	not entered	870726	Mackerel_hologenome	not applicable	not applicable	fish organs	host-associated	animal	animal-corpus	no	not applicable	not provided	no	not applicable	not applicable	not applicable
Fish_2_1x_GD2_01_20495.mzXML	mackerel_7iyn	pacific mackerel- self caught	simple	food	aquatic	animal	animal	seafood	fish_saltwater	mackerel	7iyn	not applicable	not applicable	not applicable	frozen	not applicable	not applicable	not applicable	not collected	not provided	TRUE	194	urban biome	anthropogenic environmental material	food product	misc environment	none	USA:CA:San Diego	not entered	not entered	32.842	-117.258	food metagenome	not entered	870726	Mackerel_hologenome	not applicable	not applicable	fish organs	host-associated	animal	animal-corpus	no	not applicable	not provided	no	not applicable	not applicable	not applicable
Fish_3_1x_GD3_01_20498.mzXML	mackerel_skin	pacific mackerel- self caught	simple	food	aquatic	animal	animal	seafood	fish_saltwater	mackerel	skin	not applicable	not applicable	not applicable	frozen	not applicable	not applicable	not applicable	not collected	not provided	TRUE	195	urban biome	anthropogenic environmental material	food product	misc environment	none	USA:CA:San Diego	not entered	not entered	32.842	-117.258	food metagenome	not entered	870726	Mackerel_hologenome	not applicable	not applicable	fish organs	host-associated	animal	animal-corpus	no	not applicable	not provided	no	not applicable	not applicable	not applicable
Fish_4_1x_GD4_01_20501.mzXML	mackerel_tail	pacific mackerel- self caught	simple	food	aquatic	animal	animal	seafood	fish_saltwater	mackerel	tail	not applicable	not applicable	not applicable	frozen	not applicable	not applicable	not applicable	not collected	not provided	TRUE	196	urban biome	anthropogenic environmental material	food product	misc environment	none	USA:CA:San Diego	not entered	not entered	32.842	-117.258	food metagenome	not entered	870726	Mackerel_hologenome	not applicable	not applicable	fish organs	host-associated	animal	animal-corpus	no	not applicable	not provided	no	not applicable	not applicable	not applicable
Fish_5_1x_GD5_01_20504.mzXML	mackerel_tail muscl	pacific mackerel- self caught	simple	food	aquatic	animal	animal	seafood	fish_saltwater	mackerel	tail muscl	not applicable	not applicable	not applicable	frozen	not applicable	not applicable	not applicable	not collected	not provided	TRUE	197	urban biome	anthropogenic environmental material	food product	misc environment	none	USA:CA:San Diego	not entered	not entered	32.842	-117.258	food metagenome	not entered	870726	Mackerel_hologenome	not applicable	not applicable	fish organs	host-associated	animal	animal-corpus	no	not applicable	not provided	no	not applicable	not applicable	not applicable
Fish_6_1x_GD6_01_20507.mzXML	mackerel_gill	pacific mackerel- self caught	simple	food	aquatic	animal	animal	seafood	fish_saltwater	mackerel	gill	not applicable	not applicable	not applicable	frozen	not applicable	not applicable	not applicable	not collected	not provided	TRUE	198	urban biome	anthropogenic environmental material	food product	misc environment	none	USA:CA:San Diego	not entered	not entered	32.842	-117.258	food metagenome	not entered	870726	Mackerel_hologenome	not applicable	not applicable	fish organs	host-associated	animal	animal-corpus	no	not applicable	not provided	no	not applicable	not applicable	not applicable
Fish_7_1x_GD7_01_20510.mzXML	mackerel_stomach_9	pacific mackerel- self caught	simple	food	aquatic	animal	animal	seafood	fish_saltwater	mackerel	stomach_9	not applicable	not applicable	not applicable	frozen	not applicable	not applicable	not applicable	not collected	not provided	TRUE	199	urban biome	anthropogenic environmental material	food product	misc environment	none	USA:CA:San Diego	not entered	not entered	32.842	-117.258	food metagenome	not entered	870726	Mackerel_hologenome	not applicable	not applicable	fish organs	host-associated	animal	animal-corpus	no	not applicable	not provided	no	not applicable	not applicable	not applicable
Fish_8_1x_GD8_01_20513.mzXML	mackerel_gonad_13	pacific mackerel- self caught	simple	food	aquatic	animal	animal	seafood	fish_saltwater	mackerel	gonad_13	not applicable	not applicable	not applicable	frozen	not applicable	not applicable	not applicable	not collected	not provided	TRUE	200	urban biome	anthropogenic environmental material	food product	misc environment	none	USA:CA:San Diego	not entered	not entered	32.842	-117.258	food metagenome	not entered	870726	Mackerel_hologenome	not applicable	not applicable	fish organs	host-associated	animal	animal-corpus	no	not applicable	not provided	no	not applicable	not applicable	not applicable
Fish_9_1x_GE1_01_20516.mzXML	mackerel_heart	pacific mackerel- self caught	simple	food	aquatic	animal	animal	seafood	fish_saltwater	mackerel	heart	not applicable	not applicable	not applicable	frozen	not applicable	not applicable	not applicable	not collected	not provided	TRUE	201	urban biome	anthropogenic environmental material	food product	misc environment	none	USA:CA:San Diego	not entered	not entered	32.842	-117.258	food metagenome	not entered	870726	Mackerel_hologenome	not applicable	not applicable	fish organs	host-associated	animal	animal-corpus	no	not applicable	not provided	no	not applicable	not applicable	not applicable
G000073460_170522180710.mzXML	G73460	Abbott Total Comfort	complex	food	land	plant	complex	complex	complex	complex	complex	not applicable	not applicable	not applicable	not entered	not entered	not entered	not entered	not entered	not entered	not entered	not entered	not entered	not entered	not entered	not entered	not entered	not entered	not entered	not entered	not entered	not entered	not entered	not entered	not entered	not entered	not entered	not entered	infant formula	host-associated	plant	plant-corpus	no	not applicable	not applicable	no	not applicable	not entered	not entered
G000073461_170522182039.mzXML	G73461	Abbott Pro Sensitive	complex	food	land	complex	complex	complex	complex	complex	complex	not applicable	not applicable	not applicable	not entered	not entered	not entered	not entered	not entered	not entered	not entered	not entered	not entered	not entered	not entered	not entered	not entered	not entered	not entered	not entered	not entered	not entered	not entered	not entered	not entered	not entered	not entered	not entered	infant formula	host-associated	not applicable	not applicable	no	not applicable	not applicable	no	not applicable	not entered	not entered
G000073462_170522183406.mzXML	G73462	Abbot Pro Advance	complex	food	land	complex	complex	complex	complex	complex	complex	not applicable	not applicable	not applicable	not entered	not entered	not entered	not entered	not entered	not entered	not entered	not entered	not entered	not entered	not entered	not entered	not entered	not entered	not entered	not entered	not entered	not entered	not entered	not entered	not entered	not entered	not entered	not entered	infant formula	host-associated	not applicable	not applicable	no	not applicable	not applicable	no	not applicable	not entered	not entered
G72441_1x_BA6_01_17274.mzXML	11442.G72441	lemon peel	simple	food	land	plant	fruit	fleshy fruit	citrus	lemon	lemon	not applicable	not applicable	not applicable	not applicable	Citrus	Citrus sp.	fruit	Rutaceae	2017-04-30 21:00:00	TRUE	193	urban biome	anthropogenic environmental material	food product	misc environment	none	USA:CA:San Diego	not entered	not entered	32.842	-117.258	food metagenome	not entered	870726	Global FoodOmics	not entered	not entered	lemon	host-associated	plant	plant-corpus	no	2	not provided	no	not applicable	not applicable	not applicable
G72446_5x_10ul_RH2_01_19569.mzXML	11442.G72446	cooked rice in chicken biryani	complex	food	land	complex	complex	complex	complex	complex	complex	not applicable	not applicable	not applicable	cooked	oryza	oryza sp.	fruit	Poaceae	2017-04-30 21:00:00	TRUE	193	urban biome	anthropogenic environmental material	food product	misc environment	lt yellow	USA:CA:San Diego	not entered	not entered	32.842	-117.258	food metagenome	not entered	870726	Global FoodOmics	not entered	not entered	indian dish	host-associated	not applicable	not applicable	no	4	not provided	no	not applicable	not applicable	not applicable
G72448_5x_BG12_01_18396.mzXML	11442.G72448	pita in chicken biryani	complex	food	land	plant	complex	complex	complex	complex	complex	not applicable	not applicable	not applicable	baked	not applicable	not applicable	not applicable	not collected	2017-04-30 21:00:00	TRUE	193	urban biome	anthropogenic environmental material	food product	misc environment	none	USA:CA:San Diego	not entered	not entered	32.842	-117.258	food metagenome	not entered	870726	Global FoodOmics	not entered	not entered	pita bread	host-associated	plant	plant-corpus	no	7	not provided	no	not applicable	not applicable	not applicable
G72449_1x_BB6_01_17263.mzXML	11442.G72449	raw green onion	simple	food	land	plant	vegetable/herb	vegetable/herb	vegetable	onion	green onion	not applicable	not applicable	not applicable	not applicable	Allium	Allium sp.	stem	Amaryllidaceae	2017-05-02 21:00:00	TRUE	193	urban biome	anthropogenic environmental material	food product	misc environment	none	USA:CA:San Diego	not entered	not entered	32.842	-117.258	food metagenome	not entered	870726	Global FoodOmics	not entered	not entered	onion	host-associated	plant	plant-corpus	no	2	not provided	no	not applicable	not applicable	not applicable
G72450_5x_BA3_01_18258.mzXML	11442.G72450	organic butter	simple	food	land	animal	animal	dairy	butter	butter	butter	not applicable	not applicable	not applicable	processed	not applicable	not applicable	not applicable	not collected	2017-05-02 20:15:00	TRUE	193	urban biome	anthropogenic environmental material	food product	misc environment	none	USA:CA:San Diego	not entered	not entered	32.842	-117.258	food metagenome	not entered	870726	Global FoodOmics	not entered	not entered	butter	host-associated	animal	animal-secretion	no	7	not provided	no	not applicable	not applicable	not applicable
G72451_p2_c6_GA3_01_21633.mzXML	11442.G72451	raw red onion	simple	food	land	plant	vegetable/herb	vegetable/herb	vegetable	onion	red onion	not applicable	not applicable	not applicable	not applicable	Allium	Allium sp.	stem	Amaryllidaceae	2017-05-02 21:15:00	TRUE	193	urban biome	anthropogenic environmental material	food product	misc environment	none	USA:CA:San Diego	not entered	not entered	32.842	-117.258	food metagenome	not entered	870726	Global FoodOmics	not entered	not entered	onion	host-associated	plant	plant-corpus	no	2	not provided	no	not applicable	not applicable	not applicable
G72452_rerun_5ul_RE11_01_17715.mzXML	11442.G72452	walnut	simple	food	land	plant	fruit	fleshy fruit	drupe	walnut	walnut	not applicable	not applicable	not applicable	not applicable	Juglans	Juglans sp.	fruit	Juglandaceae	2017-05-02 21:15:00	TRUE	193	urban biome	anthropogenic environmental material	food product	misc environment	none	USA:CA:San Diego	not entered	not entered	32.842	-117.258	food metagenome	not entered	870726	Global FoodOmics	not entered	not entered	nut	host-associated	plant	plant-corpus	no	11	not provided	no	not applicable	not applicable	not applicable
G72453_RA12_01_17534.mzXML	11442.G72453	raw jasmine rice	simple	food	land	plant	fruit	grain/grass	grain/grass	rice	jasmine white rice	not applicable	not applicable	not applicable	not applicable	oryza	oryza sativa	seed	Poaceae	2017-05-02 21:15:00	TRUE	193	urban biome	anthropogenic environmental material	food product	misc environment	none	USA:CA:San Diego	not entered	not entered	32.842	-117.258	food metagenome	not entered	870726	Global FoodOmics	not entered	not entered	grain	host-associated	plant	plant-corpus	no	11	not provided	no	not applicable	not applicable	not applicable
G72454_BE3_01_19004.mzXML	11442.G72454	potato chip	complex	food	land	plant	vegetable/herb	vegetable/herb	vegetable	potato	potato	not applicable	not applicable	not applicable	processed	not applicable	not applicable	not applicable	not collected	2017-05-02 21:15:00	TRUE	193	urban biome	anthropogenic environmental material	food product	misc environment	none	USA:CA:San Diego	not entered	not entered	32.842	-117.258	food metagenome	not entered	870726	Global FoodOmics	not entered	not entered	chip	host-associated	plant	plant-corpus	no	9	not provided	not collected	not collected	not applicable	not applicable
G72455_BD3_01_18990.mzXML	11442.G72455	dried chickpea snack	complex	food	land	plant	complex	complex	complex	complex	complex	not applicable	not applicable	not applicable	dried	Cicer	Cicer sp.	fruit	Fabaceae	2017-05-02 21:15:00	TRUE	193	urban biome	anthropogenic environmental material	food product	misc environment	none	USA:CA:San Diego	not entered	not entered	32.842	-117.258	food metagenome	not entered	870726	Global FoodOmics	not entered	not entered	snack	host-associated	plant	plant-corpus	no	9	not provided	no	not applicable	not applicable	not applicable
G72456_10x_BH6_01_17934.mzXML	11442.G72456	baby snack, cheese twists	complex	food	land	complex	complex	complex	complex	complex	complex	not applicable	not applicable	not applicable	processed	not applicable	not applicable	not applicable	not collected	2017-05-08	TRUE	193	urban biome	anthropogenic environmental material	food product	misc environment	none	USA:CA:San Diego	not entered	not entered	32.842	-117.258	food fermentation metagenome	not entered	1154581	Global FoodOmics	not entered	not entered	baby food dairy	host-associated	not applicable	not applicable	yes	1	not provided	natural	natural flavoring	not applicable	not applicable
G72457_10x_rerun_BA7_01_17917.mzXML	11442.G72457	toddler formula mix	complex	food	complex	complex	complex	complex	complex	complex	complex	not applicable	not applicable	not applicable	processed	not applicable	not applicable	not applicable	not collected	2017-05-08	TRUE	193	urban biome	anthropogenic environmental material	food product	misc environment	none	USA:CA:San Diego	not entered	not entered	32.842	-117.258	food metagenome	not entered	870726	Global FoodOmics	not entered	not entered	formula	host-associated	not applicable	not applicable	no	1	not provided	natural;artificial	both	not applicable	not applicable
G72458_10x_BB7_01_17809.mzXML	11442.G72458	Trader Joe's mac'n'cheese	complex	food	land	complex	complex	complex	complex	complex	complex	not applicable	not applicable	not applicable	processed	not applicable	not applicable	not applicable	not collected	2017-05-08	TRUE	193	urban biome	anthropogenic environmental material	food product	misc environment	none	USA:CA:San Diego	not entered	not entered	32.842	-117.258	food fermentation metagenome	not entered	1154581	Global FoodOmics	not entered	not entered	pasta	host-associated	not applicable	not applicable	yes	1	not provided	no	not applicable	not applicable	not applicable
G72459_10x_BC7_01_17816.mzXML	11442.G72459	baby snack, cereal puffs	complex	food	land	plant	complex	complex	complex	complex	complex	not applicable	not applicable	not applicable	processed	not applicable	not applicable	not applicable	not collected	2017-05-08	TRUE	193	urban biome	anthropogenic environmental material	food product	misc environment	none	USA:CA:San Diego	not entered	not entered	32.842	-117.258	food metagenome	not entered	870726	Global FoodOmics	not entered	not entered	baby food cereal	host-associated	plant	plant-corpus	no	1	not provided	natural	natural strawberry apple flavor;tocopherols for freshness;refined sugar	not applicable	not applicable
G72460_10x_BD7_01_17828.mzXML	11442.G72460	toddler food, chicken sticks	complex	food	land	complex	complex	complex	complex	complex	complex	not applicable	not applicable	not applicable	processed	not applicable	not applicable	not applicable	not collected	2017-05-08	TRUE	193	urban biome	anthropogenic environmental material	food product	misc environment	none	USA:CA:San Diego	not entered	not entered	32.842	-117.258	food metagenome	not entered	870726	Global FoodOmics	not entered	not entered	baby food meat	host-associated	animal	animal-corpus	no	1	not provided	natural	natural flavoring	not applicable	not applicable
G72461_10x_BE7_01_17843.mzXML	11442.G72461	Philadelphia strawberry cream cheese	complex	food	land	animal	animal	dairy	cheese	cream cheese	cream cheese	not applicable	not applicable	not applicable	fermented	not applicable	not applicable	not applicable	not collected	2017-05-08	TRUE	193	urban biome	anthropogenic environmental material	food product	misc environment	none	USA:CA:San Diego	not entered	not entered	32.842	-117.258	food fermentation metagenome	not entered	1154581	Global FoodOmics	not entered	not entered	cream cheese	host-associated	animal	animal-secretion	yes	1	not provided	natural	strawberry puree	not applicable	not applicable
G72462_10x_BF7_01_17855.mzXML	11442.G72462	Country potato white bread	complex	food	land	plant	complex	complex	complex	complex	complex	not applicable	not applicable	not applicable	processed	not applicable	not applicable	not applicable	not collected	2017-05-08	TRUE	193	urban biome	anthropogenic environmental material	food product	misc environment	none	USA:CA:San Diego	not entered	not entered	32.842	-117.258	food fermentation metagenome	not entered	1154581	Global FoodOmics	not entered	not entered	bread	host-associated	plant	plant-corpus	yes	1	not provided	yes	vitamins;minerals	not applicable	not applicable
G72463_p1_g7_GD4_01_21938.mzXML	11442.G72463	Borodinsky rye bread	complex	food	land	plant	fruit	grain/grass	complex	complex	complex	not applicable	not applicable	not applicable	processed	not applicable	not applicable	not applicable	not collected	2017-05-08	TRUE	193	urban biome	anthropogenic environmental material	food product	misc environment	none	USA:CA:San Diego	not entered	not entered	32.842	-117.258	food fermentation metagenome	not entered	1154581	Global FoodOmics	not entered	not entered	bread	host-associated	plant	plant-corpus	yes	1	not provided	no	not applicable	not applicable	not applicable
G72464_10x_BG5_01_17922.mzXML	11442.G72464	Pacifico beer	simple	beverage	land	plant	fruit	grain/grass	grain/grass	grain_fermented	complex	alcoholic	carbonated	beer	fermented	not applicable	not applicable	not applicable	not collected	2017-05-08	TRUE	193	urban biome	anthropogenic environmental material	food product	misc environment	liquid sample yellow	USA:CA:San Diego	not entered	not entered	32.842	-117.258	food fermentation metagenome	not entered	1154581	Global FoodOmics	not entered	not entered	beer	host-associated	plant	plant-corpus	yes	1	not provided	no	not applicable	not applicable	not applicable
G72465_10x_BH7_01_17935.mzXML	11442.G72465	baby food, gerber rice and banana apple cereal mix	complex	food	land	plant	fruit	complex	complex	complex	complex	not applicable	not applicable	not applicable	processed	not applicable	not applicable	not applicable	not collected	2017-05-08	TRUE	193	urban biome	anthropogenic environmental material	food product	misc environment	none	USA:CA:San Diego	not entered	not entered	32.842	-117.258	food metagenome	not entered	870726	Global FoodOmics	not entered	not entered	baby food cereal	host-associated	plant	plant-corpus	no	1	not provided	natural;artificial	both	not applicable	not applicable
G72466_10x_BA8_01_17873.mzXML	11442.G72466	baby food, Earth's best multigrain cereal mix	complex	food	land	plant	fruit	grain/grass	grain/grass	complex	complex	not applicable	not applicable	not applicable	processed	not applicable	not applicable	not applicable	not collected	2017-05-08	TRUE	193	urban biome	anthropogenic environmental material	food product	misc environment	none	USA:CA:San Diego	not entered	not entered	32.842	-117.258	food metagenome	not entered	870726	Global FoodOmics	not entered	not entered	baby food cereal	host-associated	plant	plant-corpus	no	1	not provided	no	not applicable	not applicable	not applicable
G72467_10x_BB8_01_17915.mzXML	11442.G72467	pretzel sticks	complex	food	land	complex	complex	complex	complex	complex	complex	not applicable	not applicable	not applicable	processed	not applicable	not applicable	not applicable	not collected	2017-05-08	TRUE	193	urban biome	anthropogenic environmental material	food product	misc environment	none	USA:CA:San Diego	not entered	not entered	32.842	-117.258	food metagenome	not entered	870726	Global FoodOmics	not entered	not entered	pretzel	host-associated	plant	plant-corpus	no	1	not provided	yes	minerals	not applicable	not applicable
G72468_p1_c8_GC8_01_21933.mzXML	11442.G72468	Turkish delight, pomegranate with pistachios	complex	food	land	complex	complex	complex	complex	complex	complex	not applicable	not applicable	not applicable	processed	not applicable	not applicable	not applicable	not collected	2017-05-08	TRUE	193	urban biome	anthropogenic environmental material	food product	misc environment	none	USA:CA:San Diego	not entered	not entered	32.842	-117.258	food metagenome	not entered	870726	Global FoodOmics	not entered	not entered	dessert	host-associated	plant	plant-corpus	no	1	not provided	not collected	not collected	not applicable	not applicable
G72469_10x_BD8_01_17829.mzXML	11442.G72469	baby food, Gerber pear pineapple	complex	food	land	plant	fruit	fleshy fruit	complex	complex	complex	not applicable	not applicable	not applicable	processed	not applicable	not applicable	not applicable	not collected	2017-05-08	TRUE	193	urban biome	anthropogenic environmental material	food product	misc environment	none	USA:CA:San Diego	not entered	not entered	32.842	-117.258	food metagenome	not entered	870726	Global FoodOmics	not entered	not entered	baby food fruit	host-associated	plant	plant-corpus	no	1	not provided	no	not applicable	not applicable	not applicable
G72470_10x_BE8_01_17844.mzXML	11442.G72470	salmon caviar	simple	food	aquatic	animal	animal	egg	egg_fish	egg_salmon	egg_salmon	not applicable	not applicable	not applicable	not applicable	not applicable	not applicable	not applicable	not collected	2017-05-08	TRUE	193	urban biome	anthropogenic environmental material	food product	misc environment	none	USA:CA:San Diego	not entered	not entered	32.842	-117.258	food metagenome	not entered	870726	Global FoodOmics	not entered	not entered	caviar	host-associated	animal	animal-corpus	no	1	not provided	no	not collected	not applicable	not applicable
G72471_1x_BD6_01_17298.mzXML	11442.G72471	raw english pea	simple	food	land	plant	fruit	legume	legume	pea	english pea	not applicable	not applicable	not applicable	not applicable	Pisum	Pisum sativum	fruit	Fabaceae	2017-04-30 21:45:00	TRUE	193	urban biome	anthropogenic environmental material	food product	misc environment	none	USA:CA:Encinitas	not entered	not entered	32.842	-117.258	food metagenome	not entered	870726	Global FoodOmics	not entered	not entered	pea	host-associated	plant	plant-corpus	no	2	not provided	no	not applicable	not applicable	not applicable
G72472_1x_rerun_BE6_01_17363.mzXML	11442.G72472	raw celery	simple	food	land	plant	vegetable/herb	vegetable/herb	vegetable	celery	celery	not applicable	not applicable	not applicable	not applicable	apium	apium sp.	stem	Apiaceae	2017-04-30 21:50:00	TRUE	193	urban biome	anthropogenic environmental material	food product	misc environment	none	USA:CA:San Diego	not entered	not entered	32.842	-117.258	food metagenome	not entered	870726	Global FoodOmics	not entered	not entered	celery	host-associated	plant	plant-corpus	no	2	not provided	no	not applicable	not applicable	not applicable
G72473_5x_BA12_01_18267.mzXML	11442.G72473	dubliner cheese	complex	food	land	animal	animal	dairy	cheese	dubliner cheese	dubliner cheese	not applicable	not applicable	not applicable	fermented	not applicable	not applicable	not applicable	not collected	2017-04-30 21:58:00	TRUE	193	urban biome	anthropogenic environmental material	food product	misc environment	none	USA:CA:San Diego	not entered	not entered	32.842	-117.258	food fermentation metagenome	not entered	1154581	Global FoodOmics	not entered	not entered	cheese	host-associated	animal	animal-secretion	yes	7	not provided	no	not applicable	not applicable	not applicable
G72474_5x_10ul_BB8_01_19656.mzXML	11442.G72474	dark chocolate w/ hazelnuts	complex	food	land	complex	complex	complex	complex	complex	complex	not applicable	not applicable	not applicable	processed	not applicable	not applicable	not applicable	not collected	2017-04-30 10:04:00	TRUE	193	urban biome	anthropogenic environmental material	food product	misc environment	none	USA:CA:San Diego	not entered	not entered	32.842	-117.258	food fermentation metagenome	not entered	1154581	Global FoodOmics	not entered	not entered	chocolate	host-associated	plant	plant-corpus	yes	6	not provided	no	hazelnuts	not applicable	not applicable
G72477_1x_BF2_01_19535.mzXML	11442.G72477	uncooked tempeh	complex	food	land	plant	fruit	legume	legume	bean	soybean	not applicable	not applicable	not applicable	not applicable	not applicable	not applicable	not applicable	not collected	2017-04-30 09:33:00	TRUE	193	urban biome	anthropogenic environmental material	food product	misc environment	none	USA:CA:San Diego	not entered	not entered	32.842	-117.258	food fermentation metagenome	not entered	1154581	Global FoodOmics	not entered	not entered	vegan dish	host-associated	plant	plant-corpus	yes	4	not provided	no	not applicable	not applicable	not applicable
G72478_1x_BF6_01_17324.mzXML	11442.G72478	raw ginger	simple	food	land	plant	vegetable/herb	vegetable/herb	vegetable	ginger	ginger	not applicable	not applicable	not applicable	not applicable	Zingiber	Zingiber sp.	tuber	Zingiberaceae	2017-04-30 21:50:00	TRUE	193	urban biome	anthropogenic environmental material	food product	misc environment	none	USA:CA:San Diego	not entered	not entered	32.842	-117.258	food metagenome	not entered	870726	Global FoodOmics	not entered	not entered	spice	host-associated	plant	plant-corpus	no	2	not provided	no	not applicable	not applicable	not applicable
G72479_5x_rerun_10ul_BA8_01_19654.mzXML	11442.G72479	dark chocolate w/ almond butter	complex	food	land	complex	complex	complex	complex	complex	complex	not applicable	not applicable	not applicable	processed	not applicable	not applicable	not applicable	not applicable	2017-04-30 10:17:00	TRUE	193	urban biome	anthropogenic environmental material	food product	misc environment	none	USA:CA:San Diego	not entered	not entered	32.842	-117.258	food fermentation metagenome	not entered	1154581	Global FoodOmics	not entered	not entered	chocolate	host-associated	plant	plant-corpus	yes	6	not provided	no	almond butter	not applicable	not applicable
G72480_1x_BG6_01_17337.mzXML	11442.G72480	strawberries (california giant, organic )	simple	food	land	plant	fruit	fleshy fruit	pseudocarp	strawberry	strawberry	not applicable	not applicable	not applicable	not applicable	Fragaria	Fragaria sp.	fruit	Rosaceae	2017-04-30 21:50:00	TRUE	193	urban biome	anthropogenic environmental material	food product	misc environment	none	USA:CA:San Diego	not entered	not entered	32.842	-117.258	food metagenome	not entered	870726	Global FoodOmics	not entered	not entered	berry	host-associated	plant	plant-corpus	no	2	not provided	no	not applicable	not applicable	not applicable
G72481_5x_rerun_10ul_RD2_01_19581.mzXML	11442.G72481	sourdough loaf (Whole foods)	complex	food	land	plant	fruit	grain/grass	grain/grass	complex	complex	not applicable	not applicable	not applicable	baked	not applicable	not applicable	not applicable	not collected	2017-05-01 09:33:00	TRUE	193	urban biome	anthropogenic environmental material	food product	misc environment	none	USA:CA:San Diego	not entered	not entered	32.842	-117.258	food fermentation metagenome	not entered	1154581	Global FoodOmics	not entered	not entered	bread	host-associated	not applicable	not applicable	yes	4	not provided	no	not applicable	not applicable	not applicable
G72482_BG3_01_19035.mzXML	11442.G72482	blackberry jam	complex	food	land	plant	fruit	fleshy fruit	drupe_aggregate	blackberry	blackberry	not applicable	not applicable	not applicable	processed	not applicable	not applicable	not applicable	not collected	2017-04-30 22:33:00	TRUE	193	urban biome	anthropogenic environmental material	food product	misc environment	off pink color	USA:CA:San Diego	not entered	not entered	32.842	-117.258	food metagenome	not entered	870726	Global FoodOmics	not entered	not entered	jam	host-associated	plant	plant-corpus	no	9	not provided	no	not applicable	not applicable	not applicable
G72483_rerun_BB3_01_19064.mzXML	11442.G72483	buttery spread original earth balance	complex	food	land	plant	fruit	complex	complex	complex	complex	not applicable	not applicable	not applicable	processed	not applicable	not applicable	not applicable	not collected	2017-04-30 22:36:00	TRUE	193	urban biome	anthropogenic environmental material	food product	misc environment	none	USA:CA:San Diego	not entered	not entered	32.842	-117.258	food metagenome	not entered	870726	Global FoodOmics	not entered	not entered	butter alternative	host-associated	plant	plant-corpus	no	9	not provided	yes	natural flavoring	not applicable	not applicable
G72484_1x_8ul_BE12_01_20201.mzXML	11442.G72484	Philadelphia cream cheese	complex	food	land	animal	animal	dairy	cheese	cream cheese	cream cheese	not applicable	not applicable	not applicable	fermented	not applicable	not applicable	not applicable	not collected	2017-04-30 22:41:00	TRUE	193	urban biome	anthropogenic environmental material	food product	misc environment	none	USA:CA:San Diego	not entered	not entered	32.842	-117.258	food fermentation metagenome	not entered	1154581	Global FoodOmics	not entered	not entered	cream cheese	host-associated	animal	animal-secretion	yes	10	not provided	no	not applicable	not applicable	not applicable
G72485_RD10_01_18365.mzXML	11442.G72485	jasmine rice	simple	food	land	plant	fruit	grain/grass	grain/grass	rice	rice	not applicable	not applicable	not applicable	not applicable	oryza	oryza sp.	seed	Poaceae	2017-04-30 22:47:00	TRUE	193	urban biome	anthropogenic environmental material	food product	misc environment	none	USA:CA:San Diego	not entered	not entered	32.842	-117.258	food metagenome	not entered	870726	Global FoodOmics	not entered	not entered	grain	host-associated	plant	plant-corpus	no	11	not provided	no	not applicable	not applicable	not applicable
G72490_5x_RA6_01_20124.mzXML	11442.G72490	Green Hot Sauce	complex	food	land	plant	fruit	complex	complex	complex	complex	not applicable	not applicable	not applicable	processed	not applicable	not applicable	not applicable	not collected	2017-05-02 12:00:00	TRUE	193	urban biome	anthropogenic environmental material	food product	misc environment	none	USA:CA:San Diego	not entered	not entered	32.842	-117.258	food metagenome	not entered	870726	Global FoodOmics	not entered	not entered	salsa	host-associated	plant	plant-corpus	no	10	not provided	no	not applicable	not applicable	not applicable
G72491_p10_h6_GD8_01_21653.mzXML	11442.G72491	Hot Hot Sauce	complex	food	land	plant	fruit	complex	complex	complex	complex	not applicable	not applicable	not applicable	processed	not applicable	not applicable	not applicable	not collected	2017-05-02 12:00:00	TRUE	193	urban biome	anthropogenic environmental material	food product	misc environment	none	USA:CA:San Diego	not entered	not entered	32.842	-117.258	food metagenome	not entered	870726	Global FoodOmics	not entered	not entered	salsa	host-associated	plant	plant-corpus	no	10	not provided	no	not applicable	not applicable	not applicable
G72492_1x_BH6_01_17350.mzXML	11442.G72492	raspberry	simple	food	land	plant	fruit	fleshy fruit	drupe_aggregate	raspberry	red raspberry	not applicable	not applicable	not applicable	not applicable	rubus	raspberry	fruit	Rosaceae	2017-06-17 20:23:00	TRUE	193	urban biome	anthropogenic environmental material	food product	misc environment	yellow	USA:CA:San Diego	not entered	not entered	32.842	-117.258	food metagenome	not entered	870726	Global FoodOmics	not entered	not entered	berry	host-associated	plant	plant-corpus	no	2	not provided	no	not applicable	not applicable	not applicable
G72493_1x_BA7_01_17275.mzXML	11442.G72493	brussel sprout	simple	food	land	plant	vegetable/herb	vegetable/herb	flower	brussel sprout	brussel sprout	not applicable	not applicable	not applicable	not applicable	Brassica	Brassica oleracea	flower/leaf	Brassicaceae	2017-06-17 20:23:00	TRUE	193	urban biome	anthropogenic environmental material	food product	misc environment	none	USA:CA:San Diego	not entered	not entered	32.842	-117.258	food metagenome	not entered	870726	Global FoodOmics	not entered	not entered	brussel sprout	host-associated	plant	plant-corpus	no	2	not provided	no	not applicable	not applicable	not applicable
G72494_BH6_01_19053.mzXML	11442.G72494	beef-less ground beef	complex	food	land	plant	vegetable/herb	vegetable/herb	vegetable	onion	onion	not applicable	not applicable	not applicable	processed	not applicable	not applicable	not applicable	not collected	2017-06-17 20:23:00	TRUE	193	urban biome	anthropogenic environmental material	food product	misc environment	none	USA:CA:San Diego	not entered	not entered	32.842	-117.258	food metagenome	not entered	870726	Global FoodOmics	not entered	not entered	meat substitute	host-associated	plant	plant-corpus	no	9	not provided	no	not applicable	not applicable	not applicable
G72495_BG6_01_19038.mzXML	11442.G72495	animal crackers	complex	food	land	plant	fruit	grain/grass	grain/grass	corn	corn flour	not applicable	not applicable	not applicable	baked	not applicable	not applicable	not applicable	not collected	2017-06-17 20:39:00	TRUE	193	urban biome	anthropogenic environmental material	food product	misc environment	none	USA:CA:San Diego	not entered	not entered	32.842	-117.258	food metagenome	not entered	870726	Global FoodOmics	not entered	not entered	cracker	host-associated	not applicable	not applicable	no	9	not provided	no	not applicable	not applicable	not applicable
G72496_2x_RC8_01_19133.mzXML	11442.G72496	cookie, oatmeal golden raisin from Scripps Day	complex	food	land	plant	complex	complex	complex	complex	complex	not applicable	not applicable	not applicable	processed	not applicable	not applicable	not applicable	not collected	2017-06-17 21:21:00	TRUE	193	urban biome	anthropogenic environmental material	food product	misc environment	none	USA:CA:San Diego	not entered	not entered	32.842	-117.258	food metagenome	not entered	870726	Global FoodOmics	not entered	not entered	cookie	host-associated	plant	plant-corpus	no	13	not provided	not collected	not collected	not applicable	not applicable
G72498_1x_BB7_01_17264.mzXML	11442.G72498	jalapeno	simple	food	land	plant	fruit	fleshy fruit	berry	pepper	jalapeno pepper	not applicable	not applicable	not applicable	not applicable	Capsicum	Capsicum annuum	fruit	Solanaceae	2017-06-18 21:06:00	TRUE	193	urban biome	anthropogenic environmental material	food product	misc environment	none	USA:CA:San Diego	not entered	not entered	32.842	-117.258	food metagenome	not entered	870726	Global FoodOmics	not entered	not entered	pepper	host-associated	plant	plant-corpus	no	2	not provided	no	not applicable	not applicable	not applicable
G72499_5x_10ul_rerun_RH5_01_19639.mzXML	11442.G72499	caper	complex	food	land	plant	vegetable/herb	vegetable/herb	vegetable	caper	caper	not applicable	not applicable	not applicable	pickled	capparis	capparis sp.	fruit	Capparaceae	2017-06-18 21:06:00	TRUE	193	urban biome	anthropogenic environmental material	food product	misc environment	none	USA:CA:San Diego	not entered	not entered	32.842	-117.258	food fermentation metagenome	not entered	1154581	Global FoodOmics	not entered	not entered	pickled veggie	host-associated	plant	plant-corpus	yes	4	not provided	no	not applicable	not applicable	not applicable
G72501_BC3_01_18940.mzXML	11442.G72501	bell pepper stuffing	complex	food	land	plant	fruit	complex	complex	complex	complex	not applicable	not applicable	not applicable	cooked	not applicable	not applicable	not applicable	not collected	2017-04-30 22:00:00	TRUE	193	urban biome	anthropogenic environmental material	food product	misc environment	none	USA:CA:San Diego	not entered	not entered	32.842	-117.258	food metagenome	not entered	870726	Global FoodOmics	not entered	not entered	stuffing	host-associated	plant	plant-corpus	no	9	not provided	no	not applicable	not applicable	not applicable
G72502_rerun_5ul_RC12_01_17659.mzXML	11442.G72502	chia seeds- dry	simple	food	land	plant	fruit	grain/grass	grain/grass	chia	chia	not applicable	not applicable	not applicable	dried	salvia	salvia hispanica	seed	Lamiaceae	2017-04-30 22:00:00	TRUE	193	urban biome	anthropogenic environmental material	food product	misc environment	none	USA:CA:San Diego	not entered	not entered	32.842	-117.258	food metagenome	not entered	870726	Global FoodOmics	not entered	not entered	grain	host-associated	plant	plant-corpus	no	11	not provided	no	not applicable	not applicable	not applicable
G72503_RA11_01_17533.mzXML	11442.G72503	McCann's steel cut oatmeal	simple	food	land	plant	fruit	grain/grass	grain/grass	oat	oat	not applicable	not applicable	not applicable	not applicable	secale	secale sp.	seed	Poaceae	2017-04-30 22:00:00	TRUE	193	urban biome	anthropogenic environmental material	food product	misc environment	none	USA:CA:San Diego	not entered	not entered	32.842	-117.258	food metagenome	not entered	870726	Global FoodOmics	not entered	not entered	grain	host-associated	plant	plant-corpus	no	11	not provided	no	not applicable	not applicable	not applicable
G72505_rerun_5ul_RG11_01_17748.mzXML	11442.G72505	McCann's quick cooking rolled oats	simple	food	land	plant	fruit	grain/grass	grain/grass	oat	oat	not applicable	not applicable	not applicable	processed	Avena	Avena sp.	seed	Poaceae	2017-04-30 22:15:00	TRUE	193	urban biome	anthropogenic environmental material	food product	misc environment	none	USA:CA:San Diego	not entered	not entered	32.842	-117.258	food metagenome	not entered	870726	Global FoodOmics	not entered	not entered	grain	host-associated	plant	plant-corpus	no	11	not provided	no	not applicable	not applicable	not applicable
G72506_1x_BG12_01_20237.mzXML	11442.G72506	Monschauer Senf, Urrezept; german mustard directly from Monschau; just opened	complex	food	land	plant	complex	complex	complex	complex	complex	not applicable	not applicable	not applicable	processed	not applicable	not applicable	not applicable	not collected	2017-04-30 22:15:00	TRUE	193	urban biome	anthropogenic environmental material	food product	misc environment	none	USA:CA:San Diego	not entered	not entered	32.842	-117.258	food metagenome	not entered	870726	Global FoodOmics	not entered	not entered	mustard	host-associated	plant	plant-corpus	no	10	not provided	no	not applicable	not applicable	not applicable
G72508_RH11_01_17791.mzXML	11442.G72508	pine nut, Trader Joe's; dry toasted	simple	food	land	plant	fruit	seed	seed	pine nut	pine nut	not applicable	not applicable	not applicable	toasted	Pinus	Pinus sp.	seed	Pinaceae	2017-04-30 22:15:00	TRUE	193	urban biome	anthropogenic environmental material	food product	misc environment	none	USA:CA:San Diego	not entered	not entered	32.842	-117.258	food metagenome	not entered	870726	Global FoodOmics	not entered	not entered	nut	host-associated	plant	plant-corpus	no	11	not provided	no	not applicable	not applicable	not applicable
G72509_5x_RB6_01_19477.mzXML	11442.G72509	cacao nib, Trader Joe's	complex	food	land	complex	complex	complex	complex	complex	complex	not applicable	not applicable	not applicable	processed	not applicable	not applicable	not applicable	not collected	2017-04-30 22:15:00	TRUE	193	urban biome	anthropogenic environmental material	food product	misc environment	none	USA:CA:San Diego	not entered	not entered	32.842	-117.258	food fermentation metagenome	not entered	1154581	Global FoodOmics	not entered	not entered	chocolate	host-associated	plant	plant-corpus	yes	4	not provided	natural	cacao;vanilla flavor	not applicable	not applicable
G72510_BA2_01_18983.mzXML	11442.G72510	roasted teriyaki seaweed snack	complex	food	complex	complex	complex	complex	complex	complex	complex	not applicable	not applicable	not applicable	roasted	not applicable	not applicable	not applicable	not collected	2017-04-30 22:15:00	TRUE	193	urban biome	anthropogenic environmental material	food product	misc environment	none	USA:CA:San Diego	not entered	not entered	32.842	-117.258	food fermentation metagenome	not entered	1154581	Global FoodOmics	not entered	not entered	seaweed	free-living	saline	water (non-saline) (saline)	yes	9	not provided	no	not applicable	not applicable	not applicable
G72511_1x_10ul_BD9_01_20293.mzXML	11442.G72511	sumac	simple	food	land	plant	fruit	fleshy fruit	berry	sumac	sumac	not applicable	not applicable	not applicable	dried;powdered	rhus	rhus sp.	fruit	Anacardiaceae	2017-04-30 22:15:00	TRUE	193	urban biome	anthropogenic environmental material	food product	misc environment	none	USA:CA:San Diego	not entered	not entered	32.842	-117.258	food metagenome	not entered	870726	Global FoodOmics	not entered	not entered	spice	host-associated	plant	plant-corpus	no	10	not provided	no	not applicable	not applicable	not applicable
G72512_1x_BF8_01_20220.mzXML	11442.G72512	cloves, ground	simple	food	land	plant	vegetable/herb	vegetable/herb	herb/spice	cloves	cloves	not applicable	not applicable	not applicable	dried and ground	syzygium	syzygium sp.	flower	Myrtaceae	2017-04-30 22:15:00	TRUE	193	urban biome	anthropogenic environmental material	food product	misc environment	none	USA:CA:San Diego	not entered	not entered	32.842	-117.258	food metagenome	not entered	870726	Global FoodOmics	not entered	not entered	spice	host-associated	plant	plant-corpus	no	10	not provided	no	not applicable	not applicable	not applicable
G72513_1x_10ul_BC8_01_20285.mzXML	11442.G72513	cardamom	simple	food	land	plant	vegetable/herb	vegetable/herb	herb/spice	cardamom	cardamom	not applicable	not applicable	not applicable	dried and ground	elettaria	elettaria sp.	seed	Zingiberaceae	2017-04-30 22:15:00	TRUE	193	urban biome	anthropogenic environmental material	food product	misc environment	none	USA:CA:San Diego	not entered	not entered	32.842	-117.258	food metagenome	not entered	870726	Global FoodOmics	not entered	not entered	spice	host-associated	plant	plant-corpus	no	10	not provided	no	not applicable	not applicable	not applicable
G72514_10x_RC9_01_20166.mzXML	11442.G72514	turmeric, ground	simple	food	land	plant	vegetable/herb	vegetable/herb	herb/spice	turmeric	turmeric	not applicable	not applicable	not applicable	dried and ground	curcuma	curcuma sp.	root	Zingiberaceae	2017-04-30 22:15:00	TRUE	193	urban biome	anthropogenic environmental material	food product	misc environment	none	USA:CA:San Diego	not entered	not entered	32.842	-117.258	food metagenome	not entered	870726	Global FoodOmics	not entered	not entered	spice	host-associated	plant	plant-corpus	no	10	not provided	no	not applicable	not applicable	not applicable
G72515_5x_RC10_01_20167.mzXML	11442.G72515	asafoetida powder	complex	food	land	plant	vegetable/herb	vegetable/herb	herb/spice	complex	complex	not applicable	not applicable	not applicable	dried and ground	ferula	ferula sp.	mastic gum/ root	Apiaceae	2017-04-30 22:15:00	TRUE	193	urban biome	anthropogenic environmental material	food product	misc environment	none	USA:CA:San Diego	not entered	not entered	32.842	-117.258	food metagenome	not entered	870726	Global FoodOmics	not entered	not entered	spice	host-associated	plant	plant-corpus	no	10	not provided	no	not applicable	not applicable	not applicable
G72516_10x_BG10_01_17926.mzXML	11442.G72516	roasted chicken	complex	food	land	animal	animal	poultry	poultry	chicken	chicken	not applicable	not applicable	not applicable	roasted	not applicable	not applicable	not applicable	not collected	2017-05-07 15:45:00	TRUE	193	urban biome	anthropogenic environmental material	food product	misc environment	none	USA:CA:San Diego	not entered	not entered	32.842	-117.258	food metagenome	not entered	870726	Global FoodOmics	not entered	not entered	meat	host-associated	animal	animal-corpus	no	1	not provided	no	not applicable	not applicable	not applicable
G72517_10x_BH10_01_17938.mzXML	11442.G72517	pineapple	simple	food	land	plant	fruit	fleshy fruit	multifruit	pineapple	pineapple	not applicable	not applicable	not applicable	not applicable	Ananas	Ananas sp.	fruit	Bromeliaceae	2017-05-07 15:45:00	TRUE	193	urban biome	anthropogenic environmental material	food product	misc environment	none	USA:CA:San Diego	not entered	not entered	32.842	-117.258	food metagenome	not entered	870726	Global FoodOmics	not entered	not entered	pineapple	host-associated	plant	plant-corpus	no	1	not provided	no	not applicable	not applicable	not applicable
G72518_10x_BA11_01_17807.mzXML	11442.G72518	medjool dates	simple	food	land	plant	fruit	fleshy fruit	drupe	date	medjool date	not applicable	not applicable	not applicable	not applicable	phoenix	phoenix sp.	fruit	Arecaceae	2017-05-07 15:45:00	TRUE	193	urban biome	anthropogenic environmental material	food product	misc environment	none	USA:CA:San Diego	not entered	not entered	32.842	-117.258	food metagenome	not entered	870726	Global FoodOmics	not entered	not entered	date	host-associated	plant	plant-corpus	no	1	not provided	no	not applicable	not applicable	not applicable
G72519_10x_BB11_01_17893.mzXML	11442.G72519	choco snack	complex	food	land	complex	complex	complex	complex	complex	complex	not applicable	not applicable	not applicable	processed	not applicable	not applicable	not applicable	not collected	2017-05-07 15:45:00	TRUE	193	urban biome	anthropogenic environmental material	food product	misc environment	none	USA:CA:San Diego	not entered	not entered	32.842	-117.258	food fermentation metagenome	not entered	1154581	Global FoodOmics	not entered	not entered	chocolate snack	host-associated	not applicable	not applicable	yes	1	not provided	not collected	not collected	not applicable	not applicable
G72520_10x_BG12_01_17904.mzXML	11442.G72520	pizza	complex	food	land	complex	complex	complex	complex	complex	complex	not applicable	not applicable	not applicable	baked	not applicable	not applicable	not applicable	not collected	2017-05-07 15:45:00	TRUE	193	urban biome	anthropogenic environmental material	food product	misc environment	none	USA:CA:San Diego	not entered	not entered	32.842	-117.258	food fermentation metagenome	not entered	1154581	Global FoodOmics	not entered	not entered	pizza	host-associated	not applicable	not applicable	yes	1	not provided	not collected	not collected	not applicable	not applicable
G72521_10x_BH12_01_17940.mzXML	11442.G72521	banana	simple	food	land	plant	fruit	fleshy fruit	berry	banana	banana	not applicable	not applicable	not applicable	not applicable	musa	musa sp.	fruit	Musaceae	2017-05-07 15:45:00	TRUE	193	urban biome	anthropogenic environmental material	food product	misc environment	none	USA:CA:San Diego	not entered	not entered	32.842	-117.258	food metagenome	not entered	870726	Global FoodOmics	not entered	not entered	banana	host-associated	plant	plant-corpus	no	1	not provided	no	not applicable	not applicable	not applicable
G72522_p1_d11_GD1_01_21934.mzXML	11442.G72522	nutella	complex	food	land	complex	complex	complex	complex	complex	complex	not applicable	not applicable	not applicable	processed	not applicable	not applicable	not applicable	not collected	2017-05-07 17:23:00	TRUE	193	urban biome	anthropogenic environmental material	food product	misc environment	none	USA:CA:San Diego	not entered	not entered	32.842	-117.258	food fermentation metagenome	not entered	1154581	Global FoodOmics	not entered	not entered	chocolate spread	host-associated	not applicable	not applicable	yes	1	not provided	no	not applicable	not applicable	not applicable
G72523_10x_BC11_01_17821.mzXML	11442.G72523	crushed red pepper	simple	food	land	plant	fruit	fleshy fruit	berry	pepper	red pepper	not applicable	not applicable	not applicable	dried	Capsicum	Capsicum sp.	fruit	Solanaceae	2017-05-07 18:10:00	TRUE	193	urban biome	anthropogenic environmental material	food product	misc environment	none	USA:CA:San Diego	not entered	not entered	32.842	-117.258	food metagenome	not entered	870726	Global FoodOmics	not entered	not entered	spice	host-associated	plant	plant-corpus	no	1	not provided	no	not applicable	not applicable	not applicable
G72524_10x_rerun_BA6_01_17909.mzXML	11442.G72524	brownies	complex	food	land	complex	complex	complex	complex	complex	complex	not applicable	not applicable	not applicable	baked	not applicable	not applicable	not applicable	not collected	2017-05-07 22:23:00	TRUE	193	urban biome	anthropogenic environmental material	food product	misc environment	none	USA:CA:San Diego	not entered	not entered	32.842	-117.258	food fermentation metagenome	not entered	1154581	Global FoodOmics	not entered	not entered	brownie	host-associated	not applicable	not applicable	yes	1	not provided	not collected	not collected	not applicable	not applicable
G72525_10x_BB6_01_17913.mzXML	11442.G72525	Naan	complex	food	land	complex	complex	complex	complex	complex	complex	not applicable	not applicable	not applicable	baked	not applicable	not applicable	not applicable	not collected	2017-05-07 22:23:00	TRUE	193	urban biome	anthropogenic environmental material	food product	misc environment	none	USA:CA:San Diego	not entered	not entered	32.842	-117.258	food metagenome	not entered	870726	Global FoodOmics	not entered	not entered	bread	host-associated	not applicable	not applicable	no	1	not provided	not collected	not collected	not applicable	not applicable
G72526_10x_3ul_BC6_01_17907.mzXML	11442.G72526	Dried Meat	complex	food	land	complex	complex	complex	complex	complex	complex	not applicable	not applicable	not applicable	dried	not applicable	not applicable	not applicable	not collected	2017-05-07 22:23:00	TRUE	193	urban biome	anthropogenic environmental material	food product	misc environment	none	USA:CA:San Diego	not entered	not entered	32.842	-117.258	food metagenome	not entered	870726	Global FoodOmics	not entered	not entered	meat	host-associated	animal	animal-corpus	no	1	not provided	preservative	sodium benzoate, sodium nitrite, etc.	not applicable	not applicable
G72527_10x_BD6_01_17827.mzXML	11442.G72527	Hershey Milk Chocolate Egg	complex	food	land	complex	complex	complex	complex	complex	complex	not applicable	not applicable	not applicable	processed	not applicable	not applicable	not applicable	not collected	2017-05-07	TRUE	193	urban biome	anthropogenic environmental material	food product	misc environment	none	USA:CA:San Diego	not entered	not entered	32.842	-117.258	food fermentation metagenome	not entered	1154581	Global FoodOmics	not entered	not entered	chocolate	host-associated	not applicable	not applicable	yes	1	not provided	artificial	artificial flavor	not applicable	not applicable
G72528_10x_BE6_01_17839.mzXML	11442.G72528	One A Day's Men Vitamin Gummies	complex	food	land	mineral	mineral	complex	complex	complex	complex	not applicable	not applicable	not applicable	processed	not applicable	not applicable	not applicable	not collected	2017-05-07	TRUE	193	urban biome	anthropogenic environmental material	food product	misc environment	none	USA:CA:San Diego	not entered	not entered	32.842	-117.258	food metagenome	not entered	870726	Global FoodOmics	not entered	not entered	vitamin mix	not applicable	not applicable	not applicable	no	1	not provided	artificial	artificially flavored	not applicable	not applicable
G72529_10x_BF6_01_17854.mzXML	11442.G72529	Toasted nori seaweed	simple	food	aquatic	algae	algae	seaweed	seaweed	nori	nori seaweed	not applicable	not applicable	not applicable	toasted	not applicable	not applicable	not applicable	not collected	2017-05-07	TRUE	193	urban biome	anthropogenic environmental material	food product	misc environment	none	USA:CA:San Diego	not entered	not entered	32.842	-117.258	food metagenome	not entered	870726	Global FoodOmics	not entered	not entered	seaweed	free-living	saline	water (non-saline) (saline)	no	1	not provided	no	not applicable	not applicable	not applicable
G72530_10x_BG6_01_17923.mzXML	11442.G72530	Spam	complex	food	land	complex	complex	complex	complex	complex	complex	not applicable	not applicable	not applicable	processed	not applicable	not applicable	not applicable	not collected	2017-05-07	TRUE	193	urban biome	anthropogenic environmental material	food product	misc environment	none	USA:CA:San Diego	not entered	not entered	32.842	-117.258	food metagenome	not entered	870726	Global FoodOmics	not entered	not entered	spam	host-associated	animal	animal-corpus	no	1	not provided	yes	sodium phosphate;potassium chloride;sodium ascorbate;sodium nitrite	not applicable	not applicable
G72531_5x_RE6_01_20193.mzXML	11442.G72531	sambal oelek	complex	food	land	plant	vegetable/herb	vegetable/herb	herb/spice	complex	complex	not applicable	not applicable	not applicable	processed	not applicable	not applicable	not applicable	not collected	2017-05-02 19:00:00	TRUE	193	urban biome	anthropogenic environmental material	food product	misc environment	none	USA:CA:San Diego	not entered	not entered	32.842	-117.258	food metagenome	not entered	870726	Global FoodOmics	not entered	not entered	sauce	host-associated	plant	plant-corpus	no	10	not provided	yes	potassium sorbate; sodium bisulfate;xanthan gum	not applicable	not applicable
G72532_1x_BC7_01_17286.mzXML	11442.G72532	long green onion	simple	food	land	plant	vegetable/herb	vegetable/herb	vegetable	onion	green onion	not applicable	not applicable	not applicable	not applicable	Allium	Allium sp.	stem	Amaryllidaceae	2017-05-02 19:00:00	TRUE	193	urban biome	anthropogenic environmental material	food product	misc environment	none	USA:CA:San Diego	not entered	not entered	32.842	-117.258	food metagenome	not entered	870726	Global FoodOmics	not entered	not entered	onion	host-associated	plant	plant-corpus	no	2	not provided	no	not applicable	not applicable	not applicable
G72533_1x_BD7_01_17299.mzXML	11442.G72533	small red bell pepper with peel	simple	food	land	plant	fruit	fleshy fruit	berry	pepper	red bell pepper	not applicable	not applicable	not applicable	not applicable	Capsicum	Capsicum sp.	fruit	Solanaceae	2017-05-02 19:00:00	TRUE	193	urban biome	anthropogenic environmental material	food product	misc environment	orange;yellow	USA:CA:San Diego	not entered	not entered	32.842	-117.258	food metagenome	not entered	870726	Global FoodOmics	not entered	not entered	pepper	host-associated	plant	plant-corpus	no	2	not provided	no	not applicable	not applicable	not applicable
G72534_1x_BE7_01_17312.mzXML	11442.G72534	radish with peel	simple	food	land	plant	vegetable/herb	vegetable/herb	vegetable	radish	red radish	not applicable	not applicable	not applicable	not applicable	Raphanus	raphanus sp.	root	Brassicaceae	2017-05-02 19:00:00	TRUE	193	urban biome	anthropogenic environmental material	food product	misc environment	none	USA:CA:San Diego	not entered	not entered	32.842	-117.258	food metagenome	not entered	870726	Global FoodOmics	not entered	not entered	radish	host-associated	plant	plant-corpus	no	2	not provided	no	not applicable	not applicable	not applicable
G72539_5x_BH8_01_20063.mzXML	11442.G72539	extra firm tofu, fried with multiple ingredients	complex	food	land	plant	fruit	legume	legume	bean	soybean	not applicable	not applicable	not applicable	fried	glycine	glycine sp.	seed	Fabaceae	2017-05-02 19:00:00	TRUE	193	urban biome	anthropogenic environmental material	food product	misc environment	pale brownish yellow	USA:CA:San Diego	not entered	not entered	32.842	-117.258	food metagenome	not entered	870726	Global FoodOmics	not entered	not entered	tofu	host-associated	plant	plant-corpus	no	15	not provided	natural	magnesium chloride;calcium sulfate	not applicable	not applicable
G72642_5x_BA6_01_18261.mzXML	11442.G72642	Flagship reserve	complex	food	land	animal	animal	dairy	cheese	cheese	cheese	not applicable	not applicable	not applicable	fermented	not applicable	not applicable	not applicable	not collected	2017-06-30	TRUE	193	urban biome	anthropogenic environmental material	food product	misc environment	none	USA:CA:Del Mar	not entered	not entered	32.842	-117.258	food fermentation metagenome	not entered	1154581	Global FoodOmics	not entered	not entered	cheese	host-associated	animal	animal-secretion	yes	7	not provided	no	not applicable	not applicable	not applicable
G72643_5x_BE4_01_18315.mzXML	11442.G72643	stilton colston basset	complex	food	land	animal	animal	dairy	cheese	stilton cheese	stilton cheese	not applicable	not applicable	not applicable	fermented	not applicable	not applicable	not applicable	not collected	2017-06-30	TRUE	193	urban biome	anthropogenic environmental material	food product	misc environment	none	USA:CA:Del Mar	not entered	not entered	32.842	-117.258	food fermentation metagenome	not entered	1154581	Global FoodOmics	not entered	not entered	cheese	host-associated	animal	animal-secretion	yes	7	not provided	no	not applicable	not applicable	not applicable
G72644_5x_BF7_01_18332.mzXML	11442.G72644	stilton colston basset	complex	food	land	animal	animal	dairy	cheese	stilton cheese	stilton cheese	not applicable	not applicable	not applicable	fermented	not applicable	not applicable	not applicable	not collected	2017-06-30	TRUE	193	urban biome	anthropogenic environmental material	food product	misc environment	none	USA:CA:Del Mar	not entered	not entered	32.842	-117.258	food fermentation metagenome	not entered	1154581	Global FoodOmics	not entered	not entered	cheese	host-associated	animal	animal-secretion	yes	7	not provided	no	not applicable	not applicable	not applicable
G72645_5x_BD10_01_18307.mzXML	11442.G72645	taleggio	complex	food	land	animal	animal	dairy	cheese	washed cheese	washed cheese	not applicable	not applicable	not applicable	fermented	not applicable	not applicable	not applicable	not collected	2017-06-30	TRUE	193	urban biome	anthropogenic environmental material	food product	misc environment	none	USA:CA:Del Mar	not entered	not entered	32.842	-117.258	food fermentation metagenome	not entered	1154581	Global FoodOmics	not entered	not entered	cheese	host-associated	animal	animal-secretion	yes	7	not provided	no	not applicable	not applicable	not applicable
G72646_5x_BE8_01_18319.mzXML	11442.G72646	taleggio	complex	food	land	animal	animal	dairy	cheese	washed cheese	washed cheese	not applicable	not applicable	not applicable	fermented	not applicable	not applicable	not applicable	not collected	2017-06-30 12:52:00	TRUE	193	urban biome	anthropogenic environmental material	food product	misc environment	none	USA:CA:Del Mar	not entered	not entered	32.842	-117.258	food fermentation metagenome	not entered	1154581	Global FoodOmics	not entered	not entered	cheese	host-associated	animal	animal-secretion	yes	7	not provided	no	not applicable	not applicable	not applicable
G72647_5x_BC9_01_18292.mzXML	11442.G72647	stinking bishop	complex	food	land	animal	animal	dairy	cheese	washed cheese	washed cheese	not applicable	not applicable	not applicable	fermented	not applicable	not applicable	not applicable	not collected	2017-06-30 12:42:00	TRUE	193	urban biome	anthropogenic environmental material	food product	misc environment	none	USA:CA:Del Mar	not entered	not entered	32.842	-117.258	food fermentation metagenome	not entered	1154581	Global FoodOmics	not entered	not entered	cheese	host-associated	animal	animal-secretion	yes	7	not provided	natural	pear juice	not applicable	not applicable
G72648_5x_BH7_01_18405.mzXML	11442.G72648	stinking bishop	complex	food	land	animal	animal	dairy	cheese	washed cheese	washed cheese	not applicable	not applicable	not applicable	fermented	not applicable	not applicable	not applicable	not collected	2017-06-30 12:57:00	TRUE	193	urban biome	anthropogenic environmental material	food product	misc environment	none	USA:CA:Del Mar	not entered	not entered	32.842	-117.258	food fermentation metagenome	not entered	1154581	Global FoodOmics	not entered	not entered	cheese	host-associated	animal	animal-secretion	yes	7	not provided	natural	pear juice	not applicable	not applicable
G72649_5x_BB2_01_18271.mzXML	11442.G72649	honey bee goat gouda	complex	food	land	animal	animal	dairy	cheese	gouda cheese	gouda cheese	not applicable	not applicable	not applicable	fermented	not applicable	not applicable	not applicable	not collected	2017-06-30	TRUE	193	urban biome	anthropogenic environmental material	food product	misc environment	none	USA:CA:Del Mar	not entered	not entered	32.842	-117.258	food fermentation metagenome	not entered	1154581	Global FoodOmics	not entered	not entered	cheese	host-associated	animal	animal-secretion	yes	7	not provided	natural	honey	not applicable	not applicable
G72650_5x_BC3_01_18286.mzXML	11442.G72650	lambchopper	complex	food	land	animal	animal	dairy	cheese	gouda cheese	gouda cheese	not applicable	not applicable	not applicable	fermented	not applicable	not applicable	not applicable	not collected	2017-06-30 12:11:00	TRUE	193	urban biome	anthropogenic environmental material	food product	misc environment	none	USA:CA:Del Mar	not entered	not entered	32.842	-117.258	food fermentation metagenome	not entered	1154581	Global FoodOmics	not entered	not entered	cheese	host-associated	animal	animal-secretion	yes	7	not provided	no	not applicable	0.25	years
G72651_5x_BC5_01_18288.mzXML	11442.G72651	le petit basque	complex	food	land	animal	animal	dairy	cheese	petit basque cheese	petit basque cheese	not applicable	not applicable	not applicable	fermented	not applicable	not applicable	not applicable	not collected	2017-06-30	TRUE	193	urban biome	anthropogenic environmental material	food product	misc environment	none	USA:CA:Del Mar	not entered	not entered	32.842	-117.258	food fermentation metagenome	not entered	1154581	Global FoodOmics	not entered	not entered	cheese	host-associated	animal	animal-secretion	yes	7	not provided	no	not applicable	not applicable	not applicable
G72652_5x_BG4_01_18388.mzXML	11442.G72652	tomme brulee	complex	food	land	animal	animal	dairy	cheese	tomme brulee cheese	tomme brulee cheese	not applicable	not applicable	not applicable	fermented	not applicable	not applicable	not applicable	not collected	2017-06-30	TRUE	193	urban biome	anthropogenic environmental material	food product	misc environment	none	USA:CA:Del Mar	not entered	not entered	32.842	-117.258	food fermentation metagenome	not entered	1154581	Global FoodOmics	not entered	not entered	cheese	host-associated	animal	animal-secretion	yes	7	not provided	no	not applicable	not applicable	not applicable
G72653_5x_BC8_01_18291.mzXML	11442.G72653	Flagship reserve	complex	food	land	animal	animal	dairy	cheese	cheddar cheese	cheddar cheese	not applicable	not applicable	not applicable	fermented	not applicable	not applicable	not applicable	not collected	2017-06-30	TRUE	193	urban biome	anthropogenic environmental material	food product	misc environment	none	USA:CA:Del Mar	not entered	not entered	32.842	-117.258	food fermentation metagenome	not entered	1154581	Global FoodOmics	not entered	not entered	cheese	host-associated	animal	animal-secretion	yes	7	not provided	no	not applicable	not applicable	not applicable
G72654_5x_BF11_01_18336.mzXML	11442.G72654	choco 21	complex	food	land	animal	animal	dairy	cheese	blue cheese	blue cheese	not applicable	not applicable	not applicable	fermented	not applicable	not applicable	not applicable	not collected	2017-06-30 12:21:00	TRUE	193	urban biome	anthropogenic environmental material	food product	misc environment	none	USA:CA:Del Mar	not entered	not entered	32.842	-117.258	food fermentation metagenome	not entered	1154581	Global FoodOmics	not entered	not entered	cheese	host-associated	animal	animal-secretion	yes	7	not provided	natural	chocolate liquour	not applicable	not applicable
G72655_5x_BG5_01_18389.mzXML	11442.G72655	shropshire	complex	food	land	animal	animal	dairy	cheese	blue cheese	blue cheese	not applicable	not applicable	not applicable	fermented	not applicable	not applicable	not applicable	not collected	2017-06-30	TRUE	193	urban biome	anthropogenic environmental material	food product	misc environment	none	USA:CA:Del Mar	not entered	not entered	32.842	-117.258	food fermentation metagenome	not entered	1154581	Global FoodOmics	not entered	not entered	cheese	host-associated	animal	animal-secretion	yes	7	not provided	natural	annato	not applicable	not applicable
G72656_5x_BE3_01_18314.mzXML	11442.G72656	erborinato san carione	complex	food	land	animal	animal	dairy	cheese	blue cheese	blue cheese	not applicable	not applicable	not applicable	fermented	not applicable	not applicable	not applicable	not collected	2017-06-30 12:21:00	TRUE	193	urban biome	anthropogenic environmental material	food product	misc environment	none	USA:CA:Del Mar	not entered	not entered	32.842	-117.258	food fermentation metagenome	not entered	1154581	Global FoodOmics	not entered	not entered	cheese	host-associated	animal	animal-secretion	yes	7	not provided	natural	coffee	not applicable	not applicable
G72658_rerun_5ul_RE10_01_17712.mzXML	11442.G72658	peanut butter	simple	food	land	plant	fruit	legume	legume	peanut	peanut butter	not applicable	not applicable	not applicable	blended	Arachis	Arachis hypogaea	seed	Fabaceae	2017-05-17 08:00:00	TRUE	193	urban biome	anthropogenic environmental material	food product	misc environment	none	USA:CA:San Diego	not entered	not entered	32.842	-117.258	food metagenome	not entered	870726	Global FoodOmics	not entered	not entered	nut butter	host-associated	plant	plant-corpus	no	11	not provided	no	not applicable	not applicable	not applicable
G72659_BH3_01_19050.mzXML	11442.G72659	red raspberry preserves	complex	food	land	plant	fruit	fleshy fruit	drupe_aggregate	raspberry	raspberry	not applicable	not applicable	not applicable	processed	rubus	raspberry	fruit	Rosaceae	2017-05-17 08:00:00	TRUE	193	urban biome	anthropogenic environmental material	food product	misc environment	none	USA:CA:San Diego	not entered	not entered	32.842	-117.258	food metagenome	not entered	870726	Global FoodOmics	not entered	not entered	preserved fruit	host-associated	plant	plant-corpus	no	9	not provided	no	not applicable	not applicable	not applicable
G72660_rerun_rerun_BA6_01_19091.mzXML	11442.G72660	buttery spread whipped	complex	food	land	plant	fruit	legume	legume	bean	soybean	not applicable	not applicable	not applicable	processed	not applicable	not applicable	not applicable	not collected	2017-05-17 08:00:00	TRUE	193	urban biome	anthropogenic environmental material	food product	misc environment	none	USA:CA:San Diego	not entered	not entered	32.842	-117.258	food metagenome	not entered	870726	Global FoodOmics	not entered	not entered	buttery spread	host-associated	plant	plant-corpus	no	9	not provided	no	not applicable	not applicable	not applicable
G72661_5x_RE5_01_20192.mzXML	11442.G72661	tabasco, 3 drops	complex	food	land	plant	fruit	complex	complex	complex	complex	not applicable	not applicable	not applicable	processed	not applicable	not applicable	not applicable	not collected	2017-05-17 08:00:00	TRUE	193	urban biome	anthropogenic environmental material	food product	misc environment	none	USA:CA:San Diego	not entered	not entered	32.842	-117.258	food fermentation metagenome	not entered	1154581	Global FoodOmics	not entered	not entered	sauce	host-associated	plant	plant-corpus	yes	10	not provided	no	not applicable	not applicable	not applicable
G72663_RF10_01_17619.mzXML	11442.G72663	poppy seeds	simple	food	land	plant	fruit	grain/grass	grain/grass	poppy seed	poppy seed	not applicable	not applicable	not applicable	not applicable	papaver	papaver sp.	seed	Papaveraceae	2017-06-22 16:40:00	TRUE	193	urban biome	anthropogenic environmental material	food product	misc environment	none	USA:CA:San Diego	not entered	not entered	32.842	-117.258	food metagenome	not entered	870726	Global FoodOmics	not entered	not entered	seed	host-associated	plant	plant-corpus	no	11	not provided	no	not applicable	not applicable	not applicable
G72664_5x_RD5_01_19507.mzXML	11442.G72664	BBQ soy protein	complex	food	land	plant	complex	complex	complex	complex	complex	not applicable	not applicable	not applicable	cooked	not applicable	not applicable	not applicable	not collected	2017-06-24 14:30:00	TRUE	193	urban biome	anthropogenic environmental material	food product	misc environment	none	USA:CA:San Diego	not entered	not entered	32.842	-117.258	food metagenome	not entered	870726	Global FoodOmics	not entered	not entered	vegan dish	host-associated	plant	plant-corpus	no	4	not provided	no	not applicable	not applicable	not applicable
G72667_BA5_01_18986.mzXML	11442.G72667	Salted Plantain Chips	complex	food	land	plant	fruit	fleshy fruit	berry	plantain	plantain	not applicable	not applicable	not applicable	dried	musa	musa sp.	fruit	Musaceae	2017-05-19	TRUE	193	urban biome	anthropogenic environmental material	food product	misc environment	none	USA:CA:San Diego	not entered	not entered	32.842	-117.258	food metagenome	not entered	870726	Global FoodOmics	not entered	not entered	fruit, dried	host-associated	plant	plant-corpus	no	9	not provided	not collected	not collected	not applicable	not applicable
G72668_5x_BH6_01_18404.mzXML	11442.G72668	Kraft Reduced fat Parmesan cheese	complex	food	land	animal	animal	dairy	cheese	parmesan cheese	parmesan cheese	not applicable	not applicable	not applicable	fermented	not applicable	not applicable	not applicable	not collected	2017-05-19	TRUE	193	urban biome	anthropogenic environmental material	food product	misc environment	none	USA:CA:San Diego	not entered	not entered	32.842	-117.258	food fermentation metagenome	not entered	1154581	Global FoodOmics	not entered	not entered	cheese	host-associated	animal	animal-secretion	yes	7	not provided	natural	rice flour; starch; maltodextrin; sorbic acid	not applicable	not applicable
G72669_1x_BG4_01_20229.mzXML	11442.G72669	Crushed red chile pepper	simple	food	land	plant	fruit	fleshy fruit	berry	pepper	red chile pepper	not applicable	not applicable	not applicable	dried	Capsicum	Capsicum sp.	fruit	Solanaceae	2017-05-19	TRUE	193	urban biome	anthropogenic environmental material	food product	misc environment	none	USA:CA:San Diego	not entered	not entered	32.842	-117.258	food metagenome	not entered	870726	Global FoodOmics	not entered	not entered	pepper	host-associated	plant	plant-corpus	no	10	not provided	no	not applicable	not applicable	not applicable
[truncated: 2,932 more rows]
[truncated: 107 more columns]

## Sheet: subgroup hierarchy
sample_type_group_1	sample_type_group2	sample_type_group3	sample_type_group4	sample_type_group5	sample_type_group6
plant	fruit	fleshy fruit	berry	tomato, grapes, eggplant, banana, avocado, kiwi, coffee, currant, passionfruit, pepper, blueberry, guava, papaya, cranberries
[truncated: 48 more rows]

## Sheet: empo category
http://www.earthmicrobiome.org/protocols-and-standards/empo/
[truncated: 10 more rows]

## Sheet: dictionary
	Metadata Category	Required	Definition	Format	Helpful hints	Links
[truncated: 157 more rows]

[truncated: 4 more sheets: botany, additives_specific, sugars, Sheet11]
